# Supplementary material for: Genetic architecture study of rheumatoid arthritis and juvenile idiopathic arthritis
Source: PeerJ. 2020 Jan 15;8:e8234. doi: 10.7717/peerj.8234 (PMC6969553; doi:10.7717/peerj.8234)
Supplement: Supplemental Information 1 [file peerj-08-8234-s001.xls]

## Sheet: Table S1
Supplementary Table 1 SNPs reaching genome-wide significance threshold of P-value < 5x10-8 in rheumatoid arthritis (RA) study.
SNP	Chr	Pos(hg19)	A1	A2	OR(A1)	Pval	95%CI
rs2258734	1	2483961	A	G	0.9	8.8e-13	0.93-0.87
rs10797431	1	2501222	T	G	0.91	1.7e-11	0.94-0.89
rs4310388	1	2507415	T	G	0.91	1.3e-12	0.93-0.88
rs60733400	1	2516781	A	G	0.9	1.7e-13	0.93-0.88
rs6667564	1	2520302	T	C	1.1	2.3e-12	1.13-1.07
rs6701238	1	2520500	A	G	0.91	2.3e-12	0.93-0.88
rs6670198	1	2520527	T	C	1.1	2.4e-12	1.13-1.07
rs876938	1	2523212	G	C	1.11	1.2e-13	1.14-1.08
rs867435	1	2523706	T	C	0.9	1.3e-13	0.93-0.88
rs867436	1	2523723	T	C	0.9	3e-13	0.93-0.88
chr1:2523811	1	2523811	A	G	0.89	3.3e-14	0.92-0.86
rs9730673	1	2523839	T	C	1.12	9.3e-13	1.16-1.09
chr1:2523878	1	2523878	A	G	1.11	5.3e-11	1.15-1.08
chr1:2523969	1	2523969	A	C	0.87	9.4e-11	0.91-0.84
chr1:2523993	1	2523993	A	G	0.9	2.9e-10	0.93-0.87
chr1:2523999	1	2523999	A	G	0.9	1.4e-12	0.92-0.87
rs745368	1	2524205	T	C	0.9	4.1e-13	0.93-0.88
rs745367	1	2524457	T	C	1.1	6.2e-12	1.13-1.07
rs10752747	1	2524915	T	G	0.9	4.4e-13	0.93-0.88
rs3828154	1	2524943	A	G	0.91	7.1e-12	0.93-0.88
rs3748819	1	2524966	T	C	0.9	4.7e-13	0.93-0.88
rs3748818	1	2525660	A	G	0.9	5e-13	0.93-0.88
rs3748817	1	2525665	T	C	1.1	7.7e-12	1.13-1.07
rs3748816	1	2526746	A	G	1.1	9e-12	1.13-1.07
rs2260976	1	2527678	A	G	0.9	5.5e-13	0.93-0.88
rs2843401	1	2528133	T	C	0.9	5e-13	0.93-0.88
rs2843402	1	2528682	T	C	0.9	5.2e-13	0.93-0.88
rs2764845	1	2528999	T	G	1.1	7.8e-12	1.13-1.07
rs2843403	1	2529097	T	C	0.91	8.2e-12	0.93-0.88
rs2764842	1	2529192	A	G	0.9	5.5e-13	0.93-0.88
rs2764841	1	2529360	A	G	1.1	8.3e-12	1.13-1.07
rs2764840	1	2529437	T	C	1.1	8.3e-12	1.13-1.07
rs2843404	1	2530558	T	C	0.9	6e-13	0.93-0.88
rs2764848	1	2530694	A	G	1.11	5.9e-13	1.14-1.08
rs2985855	1	2531372	A	C	0.9	5.6e-13	0.93-0.88
rs6689711	1	2531467	T	C	0.9	5.8e-13	0.93-0.88
rs6681973	1	2531505	T	C	1.1	9.7e-12	1.13-1.07
rs6682043	1	2531514	A	C	1.11	5.8e-13	1.14-1.08
rs2985859	1	2532416	T	C	0.9	5.6e-13	0.93-0.88
rs3001837	1	2532506	A	G	1.11	5.7e-13	1.14-1.08
rs2985857	1	2532624	T	C	1.11	5.9e-13	1.14-1.08
rs6424092	1	2532899	A	C	1.11	6.3e-13	1.14-1.08
rs10910098	1	2533250	A	C	0.9	5.9e-13	0.93-0.88
rs10910099	1	2533552	A	C	1.11	6.2e-13	1.14-1.08
rs60520190	1	2533706	A	G	0.9	6e-13	0.93-0.88
rs11585048	1	2534087	T	C	0.9	6.4e-13	0.93-0.88
rs10797435	1	2534801	G	C	1.11	6.9e-13	1.14-1.08
rs6664969	1	2534978	A	G	0.9	8.3e-13	0.93-0.88
rs4648562	1	2535613	A	C	0.9	8.9e-13	0.93-0.88
rs4648652	1	2535758	A	G	1.1	1.1e-11	1.13-1.07
rs4648653	1	2535895	T	C	0.9	8.9e-13	0.93-0.88
rs4648563	1	2536002	G	C	0.9	9.2e-13	0.93-0.88
chr1:2537095	1	2537095	A	G	0.9	8.8e-13	0.93-0.88
rs4074789	1	2537464	A	G	1.1	3.4e-11	1.13-1.07
rs41300092	1	2537838	T	C	0.91	3.7e-12	0.93-0.88
rs10910105	1	2538209	A	G	0.91	5e-12	0.93-0.88
rs10797436	1	2538349	A	G	0.91	5e-12	0.93-0.88
rs10910106	1	2538886	T	G	0.91	5.2e-12	0.93-0.88
rs10797437	1	2539006	T	C	1.1	5.4e-11	1.13-1.07
rs10910107	1	2539181	T	C	0.91	5.4e-11	0.94-0.89
rs4445406	1	2539400	T	C	1.1	5.4e-11	1.13-1.07
rs10910108	1	2539532	A	G	1.1	5.4e-11	1.13-1.07
rs4278312	1	2539555	A	G	1.1	5.4e-11	1.13-1.07
rs4422947	1	2539590	T	C	0.91	5.3e-11	0.94-0.89
rs60687045	1	2539603	A	G	0.91	5.9e-12	0.93-0.88
rs4073285	1	2539796	T	C	0.91	6.8e-12	0.93-0.88
rs4073286	1	2539901	A	C	1.1	5.3e-11	1.13-1.07
rs10797438	1	2540262	T	C	0.91	5.3e-11	0.94-0.89
rs10797439	1	2540364	A	G	0.91	5.3e-11	0.94-0.89
rs10797440	1	2541269	A	G	1.1	5.8e-11	1.13-1.07
rs10910111	1	2542653	A	G	1.1	5.4e-11	1.13-1.07
rs10752748	1	2544640	A	G	0.91	5.7e-12	0.93-0.88
rs6684865	1	2546229	A	G	0.91	6.3e-12	0.93-0.88
rs10910112	1	2551053	T	C	1.1	6.2e-11	1.13-1.07
rs10797441	1	2551660	T	G	1.1	9.8e-12	1.13-1.07
rs6673993	1	2552071	T	C	1.09	8.6e-11	1.13-1.07
rs4648654	1	2553083	A	G	0.91	8.8e-11	0.94-0.89
rs3890745	1	2553624	T	C	1.1	1.1e-11	1.13-1.07
rs4474198	1	2553758	T	C	0.91	9.2e-11	0.94-0.89
rs10797442	1	2554344	T	G	1.1	9.5e-12	1.13-1.07
rs12146058	1	2554563	A	G	1.1	1.2e-11	1.13-1.07
rs28568531	1	2555640	A	T	0.91	1.1e-11	0.93-0.88
rs7368072	1	2556125	T	C	0.91	1e-11	0.93-0.88
rs7368105	1	2556548	T	C	0.91	9.7e-12	0.93-0.88
rs7364820	1	2556709	A	G	0.91	9.7e-12	0.93-0.88
rs7523364	1	2557191	T	C	1.1	8.7e-12	1.13-1.07
rs6422657	1	2557531	T	C	1.1	8.7e-12	1.13-1.07
rs6668149	1	2558308	A	C	0.91	8.8e-12	0.93-0.88
rs12748729	1	2558740	T	C	1.1	8.8e-12	1.13-1.07
rs12730932	1	2559589	T	G	0.91	8.7e-12	0.93-0.88
rs4648657	1	2560735	A	G	0.91	8.9e-12	0.93-0.88
rs4648658	1	2560882	A	G	1.09	8.7e-11	1.13-1.07
rs4648659	1	2560903	T	G	0.91	8.9e-12	0.93-0.88
rs28532547	1	2561286	T	G	0.91	9.3e-12	0.93-0.88
rs4648564	1	2562169	T	C	1.1	9e-12	1.13-1.07
rs12749591	1	2563250	T	G	1.09	9.5e-11	1.13-1.07
rs6698817	1	2564183	T	C	0.91	1.1e-11	0.93-0.88
rs12752515	1	2564465	T	C	0.91	1.1e-11	0.93-0.88
rs6666788	1	2567500	A	G	0.91	1.3e-11	0.93-0.88
rs4648565	1	2570023	A	G	0.91	1.8e-11	0.93-0.88
rs28690427	1	2571823	A	G	0.91	1.7e-11	0.93-0.88
rs9970196	1	2574078	T	C	0.9	1.1e-11	0.93-0.88
rs28611770	1	2581542	A	G	0.9	2.1e-11	0.93-0.88
rs66517664	1	2684782	A	G	0.91	4.5e-08	0.94-0.88
chr1:2693121	1	2693121	A	T	1.1	3.1e-08	1.13-1.06
chr1:2693265	1	2693265	T	C	0.91	2.2e-08	0.94-0.88
rs4648448	1	2695687	T	C	0.92	4.7e-08	0.95-0.89
rs6666430	1	2698950	A	G	0.92	4.9e-08	0.95-0.89
chr1:2703107	1	2703107	T	G	1.09	3.5e-08	1.12-1.06
rs60389769	1	2717470	A	G	0.92	4.2e-08	0.95-0.89
rs11203290	1	17389580	T	C	1.13	1.3e-08	1.17-1.08
rs2016693	1	17397704	A	C	0.91	1.3e-08	0.94-0.88
rs875219	1	17398066	G	C	0.91	2e-08	0.94-0.89
rs875218	1	17398069	T	C	0.91	1.9e-08	0.94-0.89
rs3818048	1	17398307	A	G	0.91	2.6e-08	0.94-0.89
rs910234	1	17398427	T	C	0.91	2.7e-08	0.94-0.89
rs910233	1	17398429	T	G	0.91	2.5e-08	0.94-0.89
rs910232	1	17398514	A	C	1.09	2.4e-08	1.13-1.06
rs910230	1	17398753	A	G	0.91	2.8e-08	0.94-0.89
rs2311483	1	17398791	T	C	0.91	2.4e-08	0.94-0.89
rs3818042	1	17398849	A	G	1.09	2.1e-08	1.13-1.06
rs742798	1	17399176	T	C	0.91	2.5e-08	0.94-0.89
rs742797	1	17399256	T	C	0.91	2.4e-08	0.94-0.89
rs4448563	1	17399543	A	G	0.91	2.4e-08	0.94-0.89
rs2746531	1	17399785	A	G	0.91	2.6e-08	0.94-0.88
rs12759261	1	17399804	G	C	0.91	2.6e-08	0.94-0.89
rs6663485	1	17400061	A	G	0.91	2.5e-08	0.94-0.89
rs12134161	1	17400510	T	C	1.09	2.5e-08	1.13-1.06
rs12134165	1	17400526	G	C	1.09	2.5e-08	1.13-1.06
rs12741570	1	17400879	A	C	1.09	2.3e-08	1.13-1.06
rs2295055	1	17400966	A	G	1.1	1.4e-08	1.13-1.06
rs2295054	1	17400975	T	C	0.91	1.4e-08	0.94-0.88
rs2295053	1	17401094	A	G	1.1	1.4e-08	1.13-1.06
rs2295052	1	17401109	A	G	0.91	1.4e-08	0.94-0.88
rs2295051	1	17401137	T	C	0.91	1.4e-08	0.94-0.88
rs3818041	1	17401283	T	C	1.1	1.6e-08	1.13-1.06
rs3818040	1	17401740	T	C	0.91	1.8e-08	0.94-0.88
rs3818039	1	17401790	A	C	0.91	1.8e-08	0.94-0.88
rs3818038	1	17401805	A	G	1.1	1.8e-08	1.13-1.06
rs3818037	1	17401815	A	G	0.91	1.8e-08	0.94-0.88
rs3818036	1	17401848	T	C	0.91	1.8e-08	0.94-0.88
rs3818035	1	17402116	T	G	1.1	1.5e-08	1.13-1.06
rs3818034	1	17402135	T	C	0.91	1.6e-08	0.94-0.88
rs3818033	1	17402159	A	G	1.1	1.4e-08	1.13-1.06
rs3818032	1	17402255	T	C	1.1	1.4e-08	1.13-1.06
rs3818031	1	17402418	A	G	0.91	9.6e-09	0.94-0.88
rs2647204	1	17402420	A	G	1.1	1.8e-08	1.13-1.06
rs12138566	1	17402566	T	C	0.91	9.8e-09	0.94-0.88
rs2647203	1	17402606	T	C	0.91	1.5e-08	0.94-0.88
rs12760512	1	17402627	T	C	0.91	9.1e-09	0.94-0.88
rs12755767	1	17402643	A	G	0.91	9.1e-09	0.94-0.88
chr1:17402763	1	17402763	A	G	0.9	2e-08	0.94-0.87
rs71493540	1	17402801	T	C	1.13	3.9e-09	1.18-1.09
rs7514768	1	17403074	T	G	1.1	8.5e-09	1.13-1.06
rs7528156	1	17403103	A	G	0.91	9.7e-09	0.94-0.88
rs7523863	1	17403228	T	C	1.1	9.4e-09	1.13-1.06
rs11587943	1	17403329	T	C	0.91	9.4e-09	0.94-0.88
rs11585299	1	17403405	T	G	1.1	8.7e-09	1.13-1.06
rs11587487	1	17403407	A	G	0.91	6.6e-09	0.94-0.88
chr1:17403485	1	17403485	T	C	1.1	8.9e-09	1.13-1.06
rs35479817	1	17403488	A	C	1.1	8.9e-09	1.13-1.06
rs2647199	1	17403563	T	G	0.91	2e-08	0.94-0.88
rs2647198	1	17403901	T	C	0.91	8.1e-09	0.94-0.88
rs2647197	1	17403908	A	G	0.91	8.1e-09	0.94-0.88
rs1980510	1	17403989	T	C	0.91	8.5e-09	0.94-0.88
rs1980509	1	17404006	T	C	1.1	7.8e-09	1.13-1.06
rs35108553	1	17404802	T	C	0.91	5.3e-09	0.94-0.88
chr1:17404834	1	17404834	A	G	1.1	3.2e-09	1.14-1.07
rs35342519	1	17404836	G	C	1.1	2.7e-09	1.14-1.07
rs35210292	1	17404852	T	C	1.1	4.5e-09	1.13-1.07
rs34902742	1	17404907	A	G	1.1	5.5e-09	1.13-1.06
chr1:17404949	1	17404949	T	C	0.91	1.1e-08	0.94-0.88
rs10887995	1	17404950	A	G	1.1	1e-08	1.13-1.06
rs9435752	1	17405386	T	C	0.91	5.1e-09	0.94-0.88
rs9435753	1	17405428	T	C	1.1	5.1e-09	1.13-1.06
rs2057096	1	17405809	A	G	1.1	5.3e-09	1.13-1.06
rs2057095	1	17405916	T	C	1.1	5.3e-09	1.13-1.06
rs2057094	1	17405949	T	C	1.1	5.8e-09	1.13-1.06
rs2057092	1	17406045	T	C	1.1	5.8e-09	1.13-1.06
rs2647195	1	17406580	T	C	1.1	5.8e-09	1.13-1.06
rs3818028	1	17406793	T	C	0.91	9.9e-09	0.94-0.88
rs2746529	1	17406876	A	C	0.91	5.2e-09	0.94-0.88
rs2647194	1	17406951	A	G	1.1	5.2e-09	1.13-1.06
rs2647192	1	17407207	A	C	1.1	3.9e-09	1.13-1.06
chr1:17407209	1	17407209	A	G	1.1	5.2e-09	1.13-1.06
rs2647190	1	17407323	T	G	0.91	5.2e-09	0.94-0.88
rs2647189	1	17407416	T	C	1.1	5.3e-09	1.13-1.06
rs3818021	1	17407526	A	G	1.1	5.3e-09	1.13-1.06
rs2295050	1	17408213	T	C	0.91	5.5e-09	0.94-0.88
chr1:17408312	1	17408312	G	C	1.1	7.1e-09	1.13-1.06
rs2295048	1	17408356	G	C	1.1	5.5e-09	1.13-1.06
rs2295047	1	17408405	T	C	1.1	5.5e-09	1.13-1.06
rs2076617	1	17409017	A	G	0.91	9.5e-09	0.94-0.88
rs2235925	1	17409241	A	G	0.91	1e-08	0.94-0.88
rs2647187	1	17409382	T	C	0.91	4.5e-09	0.94-0.88
rs4989050	1	17409829	G	C	0.91	5.6e-09	0.94-0.88
rs1883913	1	17410364	A	G	1.1	5.4e-09	1.13-1.06
rs730387	1	17410557	A	G	0.91	9.4e-09	0.94-0.88
rs2076616	1	17412501	A	G	1.1	4e-09	1.14-1.07
rs2076615	1	17413121	A	C	1.11	9.9e-09	1.15-1.07
rs2076614	1	17413459	A	G	0.9	8.1e-09	0.94-0.87
rs733785	1	17413769	T	C	1.11	2.5e-09	1.15-1.07
rs761426	1	17413899	A	T	0.9	1.9e-09	0.93-0.87
rs2746523	1	17414020	A	G	0.9	2.1e-09	0.93-0.87
rs2311481	1	17414063	T	C	0.9	1.9e-09	0.93-0.87
rs742795	1	17414305	A	C	1.1	1.8e-08	1.13-1.06
rs2235924	1	17415655	A	G	0.91	3.6e-09	0.94-0.88
rs2235922	1	17416462	A	G	1.09	1.8e-08	1.13-1.06
rs2014725	1	17417253	T	C	0.91	1.9e-08	0.94-0.89
rs2014719	1	17417313	T	C	0.91	3e-08	0.94-0.89
rs2014718	1	17417315	A	G	0.91	3e-08	0.94-0.89
rs11588995	1	17417958	T	C	1.12	2.1e-08	1.17-1.08
rs2273111	1	17418894	A	G	0.91	1.7e-08	0.94-0.89
rs11203298	1	17419066	T	C	0.91	1.6e-08	0.94-0.89
rs61767325	1	17419488	A	C	1.09	1.7e-08	1.13-1.06
rs12411274	1	17419693	T	C	0.91	1.6e-08	0.94-0.89
rs2235920	1	17420398	G	C	1.09	1.6e-08	1.13-1.06
rs11203299	1	17428832	T	C	1.09	4.3e-08	1.13-1.06
rs2235909	1	17429774	T	G	0.9	4.6e-09	0.94-0.87
rs6586520	1	17638145	T	C	1.12	1.3e-13	1.15-1.08
rs10888017	1	17638752	T	C	1.11	1.9e-11	1.14-1.08
rs1886300	1	17641684	T	C	0.92	3.5e-09	0.95-0.90
rs9970772	1	17642273	T	C	1.09	3.2e-10	1.12-1.06
rs34470277	1	17643054	A	G	0.88	4.4e-17	0.91-0.86
rs55877413	1	17643218	A	T	1.11	5.8e-10	1.14-1.07
rs34298414	1	17643777	A	C	1.09	1.7e-10	1.12-1.06
rs35412937	1	17644463	T	G	0.89	1.6e-16	0.91-0.86
rs7534455	1	17645435	A	G	0.91	4e-11	0.94-0.89
rs10788663	1	17647045	T	C	0.91	1.2e-12	0.93-0.88
rs10788664	1	17647475	T	C	1.1	3.1e-12	1.14-1.07
rs4920592	1	17647920	T	C	0.92	4.2e-11	0.94-0.89
rs10888018	1	17649358	T	C	0.91	1.5e-10	0.94-0.89
rs11203355	1	17649442	A	G	1.09	4.2e-11	1.12-1.06
rs11203356	1	17649487	T	C	1.09	4.5e-11	1.12-1.06
rs10888019	1	17649489	A	G	1.09	1.4e-10	1.12-1.06
rs11203357	1	17649497	A	G	1.09	4.1e-11	1.12-1.06
rs10888020	1	17649614	A	G	0.92	4.1e-11	0.94-0.89
chr1:17649679	1	17649679	T	C	0.92	2.1e-10	0.94-0.89
rs10888022	1	17649680	A	G	1.09	1.9e-10	1.12-1.06
rs10888023	1	17649726	T	G	1.09	3.8e-11	1.12-1.06
rs11203358	1	17650247	A	G	0.9	1.5e-12	0.93-0.88
rs11203359	1	17650619	T	C	0.92	2.7e-11	0.94-0.89
rs12030939	1	17650818	A	G	0.92	2.4e-11	0.94-0.89
rs13375202	1	17651637	A	G	1.13	1.9e-17	1.16-1.10
rs11203360	1	17651694	T	C	0.91	2e-11	0.94-0.89
rs11203361	1	17651704	G	C	1.09	2e-11	1.12-1.06
rs11203362	1	17651722	T	G	1.09	2e-11	1.12-1.06
rs4920594	1	17651926	A	G	1.09	1.9e-11	1.12-1.06
rs4920595	1	17652294	G	C	0.89	1.7e-17	0.91-0.86
rs1924552	1	17653189	A	C	1.09	1.9e-11	1.12-1.07
rs1204894	1	17653954	A	T	0.91	7.6e-11	0.94-0.89
rs1204893	1	17654254	T	C	0.91	7.4e-11	0.94-0.89
rs12741565	1	17654306	T	G	1.09	1.9e-11	1.12-1.07
rs11203363	1	17655049	T	C	1.09	1.9e-11	1.12-1.07
rs11203364	1	17655066	A	T	0.91	1.9e-11	0.94-0.89
rs1748041	1	17655407	T	C	0.9	6.6e-13	0.93-0.88
rs4920363	1	17655564	A	G	1.09	2e-11	1.12-1.06
rs1957881	1	17655668	T	C	1.09	2e-11	1.12-1.06
rs1748040	1	17655714	A	G	1.09	4.8e-11	1.12-1.07
rs1957880	1	17655776	A	G	1.09	2.5e-11	1.12-1.06
rs1957879	1	17655778	A	G	0.92	2.1e-11	0.94-0.89
rs1748039	1	17656017	T	C	1.09	5e-11	1.12-1.07
rs1957878	1	17656098	A	G	0.92	2.2e-11	0.94-0.89
rs11203365	1	17656496	T	G	0.92	2.2e-11	0.94-0.89
rs12035959	1	17656635	T	C	1.09	2e-11	1.12-1.06
rs12034419	1	17656766	T	C	0.92	2.3e-11	0.94-0.89
rs1748038	1	17657123	A	G	1.11	7.6e-13	1.14-1.08
rs11203366	1	17657534	A	G	0.92	2.4e-11	0.94-0.89
rs11203367	1	17657616	T	C	1.09	2.1e-11	1.12-1.06
rs35809798	1	17657986	A	G	1.09	2.1e-11	1.12-1.06
rs12035527	1	17658337	T	C	0.92	5.4e-11	0.94-0.89
rs4920596	1	17658462	A	G	0.92	2e-11	0.94-0.89
rs4920597	1	17658505	A	G	0.92	2e-11	0.94-0.89
rs4920598	1	17658516	A	G	0.91	1.8e-11	0.94-0.89
rs12037914	1	17658554	T	C	1.09	1.8e-11	1.12-1.07
rs12035646	1	17658562	T	C	0.91	1.5e-11	0.94-0.89
rs12033604	1	17658697	T	G	0.91	1.5e-11	0.94-0.89
rs4506506	1	17658942	A	G	1.09	1.9e-11	1.12-1.06
rs4506507	1	17659176	A	T	1.09	3e-11	1.12-1.06
rs1635597	1	17659556	A	G	1.09	4.1e-11	1.12-1.07
rs3795214	1	17659813	T	C	1.09	1.8e-11	1.12-1.07
rs882537	1	17660047	A	G	1.1	4.1e-11	1.12-1.07
rs874881	1	17660499	G	C	1.09	2.7e-11	1.12-1.06
rs874882	1	17660660	A	G	0.91	1.4e-11	0.94-0.89
rs1548323	1	17660697	T	C	1.09	1.4e-11	1.12-1.07
rs12737739	1	17660890	A	C	0.88	6.6e-18	0.91-0.86
rs1555658	1	17661128	A	C	1.1	3.3e-11	1.13-1.07
rs4345840	1	17661402	A	G	0.91	1.2e-11	0.94-0.89
chr1:17661805	1	17661805	A	G	1.11	4.8e-13	1.14-1.08
rs1748035	1	17661996	T	C	1.1	3.2e-11	1.13-1.07
rs1748034	1	17662541	A	C	1.1	3.2e-11	1.13-1.07
rs2240340	1	17662639	T	C	1.09	1.2e-11	1.12-1.07
rs1748033	1	17662662	T	C	1.1	2.9e-11	1.13-1.07
rs1621005	1	17662751	G	C	0.91	2.9e-11	0.94-0.89
rs1748032	1	17662804	T	C	0.91	7.7e-11	0.94-0.89
rs1748031	1	17662907	A	T	1.1	2.1e-11	1.13-1.07
rs1748030	1	17663291	T	C	0.91	2.2e-11	0.94-0.89
rs1635593	1	17663323	G	C	1.1	2.3e-11	1.13-1.07
rs1748029	1	17663338	A	C	0.91	2.3e-11	0.94-0.89
rs1635592	1	17663407	A	G	1.1	2.2e-11	1.13-1.07
rs1635591	1	17663630	T	G	1.1	2.2e-11	1.13-1.07
rs1748028	1	17663743	T	C	1.1	2.2e-11	1.13-1.07
rs1635590	1	17663832	G	C	0.91	4.3e-11	0.94-0.89
rs1748027	1	17663930	T	C	1.1	2.2e-11	1.13-1.07
rs1635589	1	17664139	A	G	0.91	2.3e-11	0.94-0.89
chr1:17664235	1	17664235	T	C	1.1	5.1e-11	1.13-1.07
rs1635588	1	17664239	A	G	1.11	8.8e-13	1.14-1.08
rs1635587	1	17664280	T	C	1.1	2.3e-11	1.13-1.07
rs1748025	1	17664329	G	C	0.91	3.4e-11	0.94-0.89
rs1635586	1	17664770	A	G	1.1	2.2e-11	1.13-1.07
rs1635585	1	17664813	T	G	1.1	2.3e-11	1.13-1.07
rs1635584	1	17664836	A	G	0.91	2.3e-11	0.94-0.89
rs1635583	1	17665003	G	C	1.1	2.3e-11	1.13-1.07
rs2477152	1	17665064	T	C	0.91	2.2e-11	0.94-0.89
rs2428736	1	17665091	A	G	0.91	2.3e-11	0.94-0.89
rs1635582	1	17665134	A	G	0.91	2.3e-11	0.94-0.89
rs1635581	1	17665175	A	G	0.91	2.1e-11	0.94-0.89
rs1635580	1	17665293	T	C	1.1	2.1e-11	1.13-1.07
rs1635579	1	17665401	A	G	0.91	2.1e-11	0.94-0.89
rs1635578	1	17666095	T	C	1.1	1.9e-11	1.13-1.07
rs11203368	1	17666508	T	C	0.91	9e-13	0.93-0.88
rs1748021	1	17668270	A	G	1.11	1.8e-13	1.14-1.08
rs1748017	1	17670291	T	C	1.11	1.8e-13	1.14-1.08
rs1635573	1	17670431	A	C	0.91	6.9e-13	0.93-0.88
rs1635572	1	17670637	A	G	0.91	1.3e-11	0.94-0.89
rs1748016	1	17671140	T	C	1.1	9.9e-12	1.13-1.07
rs11587827	1	17671382	G	C	0.91	2.1e-12	0.93-0.89
rs2301888	1	17672730	A	G	0.88	2.2e-18	0.91-0.86
rs35210719	1	17673102	T	C	0.9	5.1e-15	0.92-0.87
rs6683037	1	17673259	T	C	0.9	5.2e-15	0.92-0.87
rs2240339	1	17674108	T	C	0.88	2.5e-18	0.91-0.86
rs2240338	1	17674185	T	C	0.88	2.7e-18	0.91-0.86
rs2240336	1	17674402	T	C	0.89	4.6e-17	0.91-0.86
rs2240335	1	17674537	A	C	0.88	3.3e-18	0.91-0.86
rs766449	1	17674852	T	C	1.11	3.2e-13	1.14-1.08
rs12137845	1	38232264	T	C	0.92	3.9e-08	0.95-0.89
chr1:38238055	1	38238055	T	C	0.92	3.9e-08	0.95-0.89
rs72661817	1	38238503	T	C	0.92	3.8e-08	0.95-0.89
rs12116786	1	38247095	A	G	0.91	6.4e-10	0.94-0.89
rs12118489	1	38247673	T	G	0.91	5.7e-10	0.94-0.89
rs11264103	1	38249493	A	G	1.1	4.7e-10	1.13-1.06
rs2306627	1	38260503	T	C	1.1	5.1e-11	1.14-1.07
rs28489009	1	38267253	A	G	1.1	5.3e-11	1.14-1.07
rs12395	1	38268836	T	C	0.91	1.1e-10	0.93-0.88
rs28411034	1	38276997	A	G	0.9	4.6e-08	0.94-0.87
rs28411352	1	38278579	T	C	1.12	3.6e-12	1.15-1.08
rs67164465	1	38281858	A	G	1.1	7e-11	1.14-1.07
rs55699901	1	38284147	A	C	1.1	1.5e-10	1.14-1.07
rs12760154	1	38284616	G	C	0.91	7.7e-11	0.93-0.88
rs12726977	1	38285556	A	G	1.1	1.9e-10	1.14-1.07
rs4653329	1	38285893	T	G	1.1	7.9e-11	1.14-1.07
rs34888157	1	38290103	T	C	1.1	2e-10	1.14-1.07
rs67704103	1	38291337	T	C	1.1	1.8e-10	1.14-1.07
rs28544343	1	38294626	T	C	1.11	1.5e-10	1.14-1.07
rs28378413	1	38301220	A	G	1.11	1.5e-10	1.14-1.07
rs28625842	1	38310786	A	G	0.9	4.7e-08	0.94-0.87
rs12729989	1	38327384	A	G	1.11	4.6e-08	1.15-1.07
rs72661861	1	38328896	A	T	0.91	1.4e-09	0.94-0.88
rs4652969	1	38332737	T	G	0.9	1.2e-10	0.93-0.88
chr1:38334317	1	38334317	A	T	1.11	9.8e-11	1.14-1.08
chr1:38334318	1	38334318	A	C	1.11	1.1e-10	1.14-1.07
rs28593140	1	38335152	T	C	0.9	1.7e-10	0.93-0.87
rs56121826	1	38342416	T	C	1.11	1.7e-10	1.14-1.07
rs72661863	1	38344602	A	G	1.11	1.7e-10	1.14-1.07
rs56023437	1	38353403	T	C	1.11	1.6e-10	1.14-1.07
rs4652970	1	38354246	A	G	1.11	1.3e-10	1.14-1.07
rs2291161	1	38355103	T	G	1.11	1.3e-10	1.14-1.07
rs34349547	1	38356870	G	C	0.9	1.2e-10	0.93-0.87
rs4281294	1	38360972	A	G	0.9	1.1e-10	0.93-0.87
rs55850309	1	38362803	A	G	1.11	1.4e-10	1.14-1.07
rs736202	1	113819380	T	C	1.21	2e-10	1.28-1.14
rs773566	1	113821584	T	C	0.91	4.1e-10	0.94-0.88
rs773560	1	113828107	A	G	1.11	1.5e-11	1.14-1.07
rs773556	1	113829208	T	C	1.1	1.9e-11	1.14-1.07
rs773554	1	113830085	T	C	1.1	2.1e-11	1.14-1.07
rs72685677	1	113840826	T	C	1.63	5.9e-32	1.77-1.50
rs773588	1	113844824	A	C	0.91	2e-11	0.93-0.88
rs12086096	1	113856853	A	G	1.11	6.7e-12	1.15-1.08
rs12061333	1	113860779	A	C	1.12	5.2e-12	1.15-1.08
rs72685699	1	113871830	T	C	0.81	4.1e-18	0.85-0.77
rs1578712	1	113880299	T	G	1.23	4.1e-18	1.29-1.18
rs9308261	1	113891118	T	C	0.92	4.7e-09	0.94-0.89
rs12128454	1	113910209	T	C	0.78	2.6e-28	0.81-0.74
rs61817534	1	113912226	A	G	1.48	1.2e-09	1.68-1.30
rs12130666	1	113912281	T	C	0.78	3.4e-28	0.81-0.75
rs12126425	1	113914390	A	G	0.78	2.8e-28	0.81-0.74
rs72685702	1	113919261	T	C	1.29	1.6e-28	1.34-1.23
rs12048327	1	113921412	T	C	1.11	1.5e-10	1.14-1.07
rs12038879	1	113922029	T	C	0.9	1.6e-10	0.93-0.87
rs12039603	1	113922234	T	C	0.9	1.6e-10	0.93-0.87
rs72687906	1	113922269	A	G	0.67	5.5e-17	0.74-0.61
rs12049447	1	113922845	T	C	1.11	1.5e-10	1.14-1.07
rs66565865	1	113923579	A	G	1.11	1.4e-10	1.14-1.07
chr1:113926865	1	113926865	T	C	1.17	9.6e-13	1.22-1.12
rs12049093	1	113927563	A	C	1.1	9.6e-09	1.13-1.06
rs12567622	1	113931145	T	C	0.91	1e-08	0.94-0.88
rs1112543	1	113931805	T	C	0.91	1.7e-08	0.94-0.89
rs72687913	1	113932279	T	G	1.43	2e-15	1.56-1.31
rs4839320	1	113932681	T	C	0.91	1.5e-08	0.94-0.89
rs12568854	1	113933570	A	G	1.1	1.4e-08	1.13-1.06
chr1:113934072	1	113934072	A	G	1.56	2.9e-11	1.78-1.37
rs2027536	1	113936988	A	G	1.09	9e-09	1.12-1.06
rs1539411	1	113938988	T	C	1.09	1.6e-08	1.13-1.06
rs1112085	1	113941165	A	G	1.09	1.5e-08	1.13-1.06
rs6688827	1	113945989	A	C	1.09	5.8e-09	1.12-1.06
rs1418607	1	113947923	T	C	1.09	1.4e-08	1.13-1.06
rs2027537	1	113948608	G	C	1.09	1.4e-08	1.13-1.06
rs12021783	1	113949328	A	C	0.91	1.4e-08	0.94-0.89
rs12023641	1	113951107	A	C	0.91	1.4e-08	0.94-0.89
rs55737954	1	113953536	A	G	1.09	1.4e-08	1.13-1.06
rs71711068	1	113958609	T	C	0.91	2e-09	0.94-0.88
chr1:113958634	1	113958634	T	C	0.91	3.9e-08	0.94-0.88
chr1:113958641	1	113958641	A	G	1.1	4.7e-08	1.14-1.07
chr1:113958650	1	113958650	G	C	0.91	3.5e-08	0.94-0.88
chr1:113958659	1	113958659	T	C	0.91	4.1e-08	0.94-0.88
chr1:113958666	1	113958666	A	G	1.18	1.4e-10	1.24-1.12
chr1:113958725	1	113958725	G	C	0.9	5.9e-09	0.94-0.87
chr1:113958734	1	113958734	T	C	0.91	2.9e-08	0.94-0.88
chr1:113958750	1	113958750	G	C	0.91	4.8e-08	0.94-0.88
chr1:113958875	1	113958875	T	C	0.9	2.5e-08	0.94-0.87
rs11102627	1	113959886	A	G	1.09	4.2e-09	1.12-1.06
rs11102628	1	113960583	A	G	1.09	4.2e-09	1.12-1.06
rs10458458	1	113966941	G	C	0.91	1e-08	0.94-0.88
rs10458459	1	113967405	T	C	1.1	1.1e-08	1.13-1.06
rs12029305	1	113967674	A	G	0.91	1.1e-08	0.94-0.88
rs12032395	1	113970774	A	G	0.91	9.7e-09	0.94-0.88
rs72687924	1	113972547	T	G	1.1	9.9e-09	1.13-1.06
rs11102630	1	113972875	A	T	0.92	4.4e-09	0.94-0.89
rs12030900	1	113974263	A	G	0.91	9e-09	0.94-0.88
rs12034178	1	113974559	T	G	1.1	9.5e-09	1.13-1.06
rs12039669	1	113982627	T	G	0.91	9.8e-09	0.94-0.88
rs12022213	1	113983654	T	C	1.1	9.8e-09	1.13-1.06
rs12039944	1	113983743	A	G	0.91	1e-08	0.94-0.88
rs1936928	1	113984057	A	G	1.1	1e-08	1.13-1.06
rs1936927	1	113984230	A	G	0.91	1e-08	0.94-0.88
rs1573996	1	113985456	A	G	0.91	1.1e-08	0.94-0.88
rs11102636	1	113989250	A	G	0.91	8.9e-09	0.94-0.88
rs12043827	1	113990049	A	G	1.1	8.9e-09	1.13-1.06
rs11102637	1	113991792	A	G	1.1	7.6e-09	1.13-1.06
chr1:113992475	1	113992475	T	C	1.1	7.8e-09	1.13-1.06
rs10857996	1	113995283	A	C	1.09	3.8e-09	1.12-1.06
rs12045559	1	113996866	T	G	1.1	8.8e-09	1.13-1.06
rs12046450	1	113997472	A	G	1.1	8.9e-09	1.13-1.06
rs11102638	1	113997686	T	C	0.91	7.7e-09	0.94-0.88
rs11102639	1	114004883	T	C	0.92	3.1e-09	0.94-0.89
rs11102640	1	114007147	T	G	1.1	5.3e-09	1.13-1.06
rs11102641	1	114008284	A	G	0.91	5.3e-09	0.94-0.88
rs72687938	1	114010937	T	G	0.91	5.6e-09	0.94-0.88
rs72687939	1	114011306	A	G	1.1	5e-09	1.13-1.07
rs12026005	1	114016258	T	C	0.91	3.6e-09	0.94-0.88
rs12027235	1	114017832	T	C	0.91	1.9e-09	0.94-0.89
rs12038754	1	114019236	T	C	1.1	3.5e-09	1.14-1.07
rs7413018	1	114019991	T	G	0.91	3.5e-09	0.94-0.88
chr1:114023067	1	114023067	T	C	1.1	3.2e-09	1.14-1.07
rs72687944	1	114023339	T	C	1.1	3.2e-09	1.14-1.07
rs12038473	1	114024348	T	C	1.1	3.2e-09	1.14-1.07
rs61819363	1	114024462	T	C	1.59	1.7e-11	1.83-1.39
rs11102644	1	114024669	A	G	0.91	3e-09	0.94-0.88
rs72687947	1	114026715	T	G	1.1	2.8e-09	1.14-1.07
rs72687948	1	114026766	A	C	0.91	2.6e-09	0.94-0.88
rs72687949	1	114027480	A	G	1.1	2.3e-09	1.14-1.07
rs12044485	1	114030926	T	C	1.1	2.3e-09	1.14-1.07
rs12039226	1	114032511	A	G	1.1	2.3e-09	1.14-1.07
rs12033666	1	114035088	A	G	0.91	2.1e-09	0.94-0.88
rs1936926	1	114036165	A	G	1.1	2.1e-09	1.14-1.07
rs28661018	1	114039645	A	G	0.91	8.2e-10	0.94-0.89
rs12046451	1	114050091	A	G	1.1	1.2e-09	1.14-1.07
chr1:114055817	1	114055817	T	G	0.9	4.4e-10	0.93-0.87
rs12046434	1	114056016	A	G	1.12	2.8e-10	1.16-1.08
rs12047332	1	114056841	A	G	1.11	1.3e-10	1.15-1.08
rs12045148	1	114057949	A	T	0.9	1.1e-09	0.93-0.88
rs4838988	1	114058280	T	C	1.11	1.1e-09	1.14-1.07
rs4839323	1	114058349	T	C	0.91	1.2e-09	0.94-0.89
rs12024139	1	114061869	T	G	1.1	1.2e-09	1.14-1.07
rs11102645	1	114063190	A	T	1.11	4.7e-10	1.15-1.07
rs12022849	1	114063523	A	G	0.91	1.3e-09	0.93-0.88
rs2884705	1	114064790	T	C	1.1	1.1e-09	1.14-1.07
rs2359413	1	114064898	T	G	0.9	1.1e-09	0.93-0.88
rs72687960	1	114065295	A	T	1.1	1.1e-09	1.14-1.07
rs72687961	1	114065340	T	C	1.1	1.1e-09	1.14-1.07
rs4546922	1	114066063	A	G	1.1	1e-09	1.13-1.06
rs12021500	1	114066991	T	C	0.91	1e-09	0.94-0.89
rs2051083	1	114068579	T	G	1.11	8.2e-10	1.14-1.07
rs12026682	1	114069085	A	G	1.11	8e-10	1.14-1.07
rs11102647	1	114071219	T	C	0.91	1e-09	0.94-0.89
rs4839324	1	114071617	A	G	1.11	2.4e-10	1.15-1.08
rs61819372	1	114072110	A	C	1.59	1.8e-11	1.82-1.39
rs72687965	1	114073152	G	C	0.71	3.7e-13	0.78-0.65
rs10858000	1	114075796	T	C	1.17	4.6e-28	1.21-1.14
rs11102648	1	114076435	A	C	1.17	3.1e-26	1.20-1.13
rs11102649	1	114076546	A	G	0.86	2.3e-25	0.89-0.84
rs17508163	1	114077939	A	G	1.11	1.8e-10	1.14-1.07
rs2153977	1	114080071	T	C	1.15	5.3e-24	1.18-1.12
rs10858001	1	114081002	G	C	0.87	5.5e-24	0.89-0.85
rs10858002	1	114082932	A	G	0.87	5.6e-24	0.89-0.85
rs4456089	1	114084544	T	C	1.17	2.4e-28	1.21-1.14
rs11102651	1	114086821	T	C	0.87	4.7e-24	0.89-0.85
rs66782936	1	114087710	T	G	1.1	5.2e-10	1.13-1.07
rs10745339	1	114088416	A	G	0.85	7.4e-28	0.88-0.83
rs17013326	1	114089316	A	G	1.17	7.5e-28	1.21-1.14
chr1:114090090	1	114090090	A	G	0.58	4e-14	0.67-0.51
rs55855422	1	114092915	A	G	0.9	3.9e-10	0.93-0.88
chr1:114093340	1	114093340	T	G	0.53	3.6e-50	0.57-0.48
rs72687973	1	114093421	A	T	1.19	3.3e-32	1.23-1.16
rs12037873	1	114093834	A	T	1.17	8.9e-28	1.21-1.14
rs12730675	1	114094044	A	G	1.11	3.9e-10	1.14-1.07
rs11102652	1	114094286	T	C	1.17	6.5e-28	1.21-1.14
rs12074958	1	114095339	A	G	0.85	1.1e-27	0.88-0.83
rs34258372	1	114095750	A	G	1.11	4.4e-10	1.14-1.07
rs12035317	1	114096097	T	G	0.85	1.2e-27	0.88-0.83
rs4274063	1	114096460	A	G	0.87	1.2e-23	0.89-0.85
rs4581284	1	114098499	A	G	0.9	4.2e-10	0.93-0.88
rs11102653	1	114101115	A	G	1.17	3.3e-28	1.21-1.14
rs6689879	1	114101719	T	C	0.87	2.7e-24	0.89-0.85
rs12043639	1	114102229	A	G	1.15	2.7e-24	1.18-1.12
rs7536360	1	114105476	A	C	0.85	4.9e-28	0.88-0.83
rs17508814	1	114106769	T	C	1.11	1.1e-10	1.14-1.07
rs72687980	1	114106807	T	C	1.17	3.4e-28	1.21-1.14
rs12077419	1	114106923	A	T	1.17	3.9e-28	1.21-1.14
rs56257513	1	114107044	T	G	1.11	1.3e-10	1.14-1.07
chr1:114107247	1	114107247	T	G	0.59	4.3e-14	0.67-0.51
rs1343128	1	114108252	A	G	1.17	4.7e-28	1.21-1.14
rs6704188	1	114108711	A	G	1.15	4.2e-24	1.18-1.12
chr1:114109088	1	114109088	A	G	1.17	4.7e-28	1.21-1.14
rs10858005	1	114109621	T	G	1.17	5.1e-28	1.21-1.14
rs1418958	1	114110836	A	T	0.85	9.3e-28	0.88-0.83
rs1418957	1	114110901	A	T	1.15	1e-23	1.18-1.12
rs1343125	1	114111036	A	G	0.85	1.1e-27	0.88-0.83
rs11102656	1	114113225	A	G	1.15	3.1e-24	1.18-1.12
rs11102657	1	114114537	A	T	0.85	1.9e-29	0.87-0.82
rs2884704	1	114114717	T	C	0.84	2.2e-32	0.86-0.81
rs2884703	1	114114843	A	G	1.17	3e-28	1.21-1.14
rs12084114	1	114116574	T	C	0.85	1.6e-29	0.87-0.82
rs12039224	1	114116845	A	G	0.87	3e-24	0.89-0.85
rs12021513	1	114116889	T	C	1.15	3e-24	1.18-1.12
rs34799402	1	114118574	T	C	0.9	1.1e-10	0.93-0.87
rs12731969	1	114118742	T	G	0.9	1.1e-10	0.93-0.87
rs10858007	1	114119237	A	G	0.85	3e-28	0.88-0.83
rs10858008	1	114119620	T	C	1.17	4.4e-28	1.21-1.14
rs11102658	1	114119751	G	C	0.87	2e-24	0.89-0.85
rs1217201	1	114123773	A	G	0.85	1.7e-28	0.88-0.83
rs1217203	1	114125259	A	G	1.18	1e-28	1.21-1.14
rs1235687	1	114126107	T	G	0.85	8.8e-29	0.87-0.83
rs1217204	1	114126220	G	C	1.18	5.1e-29	1.21-1.14
rs12753075	1	114127526	T	C	0.9	6.2e-10	0.93-0.88
rs1113523	1	114129474	A	G	1.18	2.4e-29	1.21-1.14
rs1217208	1	114130098	A	G	0.85	7e-29	0.87-0.83
rs1217237	1	114131740	T	G	1.18	5.2e-29	1.21-1.14
rs12739970	1	114132073	A	G	0.9	4.3e-10	0.93-0.88
rs12723023	1	114132358	A	G	1.11	4.4e-10	1.14-1.07
rs1217236	1	114132712	A	G	0.85	9e-29	0.88-0.83
rs1235000	1	114134025	A	G	1.08	3.8e-08	1.12-1.05
rs1217235	1	114134977	T	G	1.18	1.1e-28	1.21-1.14
rs1217234	1	114135346	G	C	0.85	1.4e-28	0.88-0.83
rs61819423	1	114135526	T	C	0.9	4.7e-10	0.93-0.88
rs61819424	1	114135555	A	G	1.11	4.7e-10	1.14-1.07
rs1217233	1	114135708	T	G	0.85	1.4e-28	0.88-0.83
rs1217232	1	114136037	T	C	0.85	1.1e-28	0.88-0.83
rs61819425	1	114136618	A	G	1.59	1.1e-12	1.81-1.40
rs61819426	1	114137902	A	G	1.63	3.4e-13	1.86-1.43
rs1217230	1	114138534	A	T	1.18	1.2e-28	1.21-1.14
rs1217228	1	114139359	T	G	1.18	1.4e-28	1.21-1.14
rs1217227	1	114139616	T	C	0.85	1.4e-28	0.88-0.83
rs1217226	1	114139922	T	C	0.85	1.4e-28	0.88-0.83
rs1217224	1	114140569	G	C	0.92	4.4e-08	0.95-0.90
rs1217223	1	114140889	A	G	1.18	1.3e-28	1.21-1.14
rs1235688	1	114141492	T	C	0.85	1.3e-28	0.88-0.83
rs1217221	1	114141775	A	G	0.85	3.8e-28	0.88-0.83
rs1217219	1	114143822	T	C	1.16	1.7e-26	1.19-1.13
chr1:114144231	1	114144231	T	G	0.84	2.3e-28	0.87-0.82
chr1:114144407	1	114144407	T	C	1.1	7.9e-10	1.14-1.07
rs9429725	1	114144408	A	G	0.9	8e-09	0.94-0.87
rs12731010	1	114144746	A	G	1.11	4.9e-10	1.14-1.07
chr1:114144768	1	114144768	A	G	0.52	2.3e-21	0.60-0.46
chr1:114144866	1	114144866	A	C	0.59	3.2e-14	0.67-0.51
rs1217215	1	114146334	A	C	0.85	7.9e-29	0.87-0.83
rs1217214	1	114147381	G	C	1.18	7.7e-29	1.21-1.14
rs1237289	1	114147865	A	G	0.85	1.4e-28	0.88-0.83
rs1217212	1	114148822	T	C	0.92	4.5e-08	0.95-0.90
rs10858011	1	114148921	A	G	1.18	7.2e-29	1.21-1.14
rs1217211	1	114149792	A	T	1.18	7.5e-29	1.21-1.14
rs9803891	1	114149945	A	G	1.11	3.7e-10	1.14-1.07
rs17031716	1	114151847	A	C	1.2	1.2e-33	1.23-1.16
chr1:114154300	1	114154300	T	C	0.53	2.9e-21	0.60-0.46
rs1228280	1	114154652	A	G	1.18	6.3e-29	1.21-1.14
rs10489936	1	114155409	G	C	0.9	5.9e-10	0.93-0.88
rs3761931	1	114157023	A	G	0.9	5.5e-10	0.93-0.88
rs1217199	1	114157788	T	C	0.85	5.8e-29	0.87-0.83
rs11102661	1	114160758	A	G	1.2	7.3e-36	1.23-1.16
rs1217200	1	114161116	A	C	0.84	6.3e-36	0.86-0.81
rs1217192	1	114162194	A	G	0.84	6.6e-36	0.86-0.81
rs1217193	1	114162619	G	C	0.84	6.9e-36	0.86-0.81
rs1217194	1	114163501	G	C	0.9	4.1e-12	0.93-0.88
rs12565589	1	114164508	A	G	1.2	6.8e-36	1.23-1.16
rs2798135	1	114166835	T	G	0.84	5.6e-36	0.86-0.81
rs1624335	1	114167780	T	G	0.9	3.9e-12	0.93-0.88
rs2798137	1	114170238	T	G	1.11	3.9e-12	1.14-1.08
rs1777234	1	114170837	A	T	1.2	5.4e-36	1.23-1.16
rs2798138	1	114171796	A	C	1.2	5.4e-36	1.23-1.16
rs35320278	1	114171838	T	G	0.9	4.4e-10	0.93-0.88
rs1230666	1	114173410	A	G	1.57	4.8e-96	1.64-1.50
rs35836713	1	114173758	T	G	0.9	4.6e-10	0.93-0.88
rs1217210	1	114173800	G	C	1.2	6.4e-36	1.23-1.16
rs1230675	1	114175770	A	G	0.9	2.2e-12	0.93-0.87
rs71662837	1	114176126	A	G	0.89	1.1e-08	0.93-0.85
rs1301795	1	114176684	T	C	0.9	3.3e-12	0.93-0.88
rs4630127	1	114177174	T	C	0.9	3.5e-10	0.93-0.87
rs1217195	1	114178764	T	C	1.11	4.8e-13	1.14-1.08
rs35383900	1	114178996	A	C	1.11	5.1e-10	1.14-1.07
rs9429523	1	114179409	A	G	0.84	9.4e-30	0.86-0.81
rs9429524	1	114179413	T	C	1.2	1.5e-32	1.24-1.16
rs1217197	1	114180320	A	G	0.86	1.4e-12	0.90-0.83
rs4328072	1	114181360	A	G	1.2	8.9e-33	1.24-1.16
rs9429525	1	114182310	T	C	0.9	3.5e-12	0.93-0.88
rs12753351	1	114182594	A	G	0.9	5.3e-10	0.93-0.88
rs1777241	1	114182622	A	G	0.84	6.2e-36	0.86-0.81
rs1743595	1	114182669	A	T	1.11	1.6e-11	1.14-1.07
rs1230663	1	114182841	A	G	1.2	1.6e-35	1.23-1.16
rs1777239	1	114183151	T	C	0.9	3.5e-12	0.93-0.88
rs2636001	1	114183574	A	C	1.19	1.2e-33	1.22-1.16
rs12745499	1	114183714	A	T	0.83	1.3e-36	0.86-0.81
rs61819459	1	114183751	A	T	0.84	1e-32	0.86-0.82
rs61820160	1	114183779	T	G	0.84	6.6e-36	0.86-0.81
rs1230661	1	114185590	A	G	1.22	8e-41	1.25-1.18
rs3747998	1	114186138	G	C	1.11	5.8e-10	1.14-1.07
rs2636002	1	114186964	A	G	0.84	2.1e-35	0.86-0.81
rs17274550	1	114187226	A	G	1.11	5.7e-10	1.14-1.07
rs1777237	1	114187371	A	G	0.84	7e-36	0.86-0.81
rs17359302	1	114187619	T	G	1.11	5.4e-10	1.14-1.07
rs2636003	1	114190167	A	C	1.11	4.4e-12	1.14-1.08
rs1777238	1	114191173	T	C	0.84	1e-35	0.86-0.81
rs3789595	1	114191647	A	G	0.9	5.2e-10	0.93-0.88
rs1743594	1	114191994	A	G	0.9	5e-12	0.93-0.88
chr1:114194164	1	114194164	G	C	0.41	4.6e-16	0.51-0.33
rs1146180	1	114194206	T	C	1.19	1.8e-34	1.23-1.16
rs1230673	1	114194513	A	G	1.11	4.7e-12	1.14-1.08
rs2359174	1	114196364	T	G	1.11	5.2e-10	1.14-1.07
rs2359173	1	114196495	A	G	1.11	5.3e-10	1.14-1.07
rs1146182	1	114196883	A	C	0.84	1.1e-35	0.86-0.81
rs7515189	1	114197693	T	C	0.87	1.3e-11	0.91-0.84
rs1230674	1	114199267	A	G	1.2	5.1e-36	1.23-1.17
rs1146183	1	114199335	A	G	1.11	4.9e-12	1.14-1.08
rs1146184	1	114203101	G	C	1.11	4.7e-12	1.14-1.08
rs1743605	1	114207314	T	G	0.84	1.2e-35	0.86-0.81
rs1146185	1	114208961	A	T	0.9	5.4e-12	0.93-0.88
rs12129076	1	114209414	A	C	0.9	1e-09	0.93-0.87
rs12119076	1	114210475	A	C	1.11	1e-09	1.15-1.07
rs1230671	1	114210745	A	T	0.84	1.2e-35	0.86-0.81
rs61820162	1	114211450	T	C	0.9	4.7e-10	0.93-0.88
rs1146187	1	114212571	A	G	1.2	1.3e-35	1.23-1.16
rs3748003	1	114214760	T	C	1.11	5.3e-10	1.14-1.07
rs1080307	1	114216449	T	G	1.1	5.8e-10	1.14-1.07
rs11102667	1	114216784	T	C	1.11	5e-12	1.14-1.08
rs17274620	1	114217355	A	T	1.11	5.8e-10	1.14-1.07
rs17274634	1	114217527	T	C	1.11	5.7e-10	1.14-1.07
rs7522138	1	114217705	A	G	0.92	7.3e-10	0.95-0.90
rs7511816	1	114217714	A	C	1.09	7.5e-10	1.11-1.06
rs1230659	1	114218261	T	C	1.2	1e-35	1.23-1.16
rs1230658	1	114218451	G	C	0.84	1e-35	0.86-0.81
rs1885454	1	114219085	T	G	1.11	4.8e-10	1.14-1.07
rs6537792	1	114219601	G	C	1.2	1e-35	1.23-1.16
rs2185971	1	114220305	T	G	0.85	3.3e-33	0.87-0.82
rs10776773	1	114220738	T	G	1.11	3.4e-12	1.14-1.08
chr1:114221123	1	114221123	G	C	1.2	9.6e-36	1.23-1.16
rs11102669	1	114222325	A	G	1.2	9.6e-36	1.23-1.16
rs1230656	1	114222516	A	C	0.82	3.9e-41	0.85-0.80
rs1230655	1	114222591	A	T	1.19	2.7e-35	1.23-1.16
rs12757859	1	114223251	T	C	0.9	2.8e-11	0.93-0.88
rs12758546	1	114223635	T	C	0.9	4.7e-10	0.93-0.88
rs4838997	1	114225306	A	G	0.84	1e-35	0.86-0.81
rs13524	1	114228200	A	G	1.11	3.9e-12	1.14-1.08
rs7543121	1	114229370	A	G	0.9	4.6e-12	0.93-0.88
rs6696784	1	114231398	A	G	0.85	3.3e-33	0.87-0.82
rs4839334	1	114233719	A	G	0.86	2.4e-24	0.88-0.83
rs4839335	1	114233871	A	G	0.84	5.2e-36	0.86-0.81
rs61817579	1	114234433	A	G	0.9	4.7e-10	0.93-0.88
rs12138638	1	114234690	T	C	0.9	4e-12	0.93-0.88
rs12746609	1	114235054	A	G	1.11	4.5e-10	1.14-1.07
rs11102671	1	114235379	A	T	0.85	1.9e-33	0.87-0.82
rs3752953	1	114242250	T	C	0.9	5e-10	0.93-0.87
rs1111695	1	114243899	A	C	0.85	3.7e-33	0.87-0.82
rs1230649	1	114244177	T	G	0.84	1.9e-33	0.87-0.82
rs1936398	1	114246453	T	C	0.84	2.2e-33	0.87-0.82
rs6698586	1	114249382	T	C	0.84	3e-33	0.87-0.82
rs1230647	1	114253639	T	C	0.84	2.9e-33	0.87-0.82
rs2295853	1	114253892	A	G	1.19	2.9e-33	1.22-1.16
rs12760067	1	114255495	A	G	1.19	4.2e-33	1.22-1.15
rs3789597	1	114256139	T	C	0.91	1.4e-10	0.93-0.88
rs7556622	1	114256379	G	C	0.85	5e-33	0.87-0.82
rs2146019	1	114258263	T	C	0.85	5.1e-33	0.87-0.82
rs1230646	1	114258882	T	G	1.21	1.1e-38	1.24-1.17
rs1230645	1	114259069	T	C	0.84	3.2e-33	0.87-0.82
rs4600045	1	114259557	T	C	1.19	3.2e-33	1.22-1.16
rs34698891	1	114261479	A	G	1.1	6.3e-10	1.14-1.07
rs12734625	1	114261576	A	C	0.9	3.5e-10	0.93-0.88
rs2636013	1	114262556	G	C	1.19	3.1e-33	1.22-1.16
rs2636014	1	114262561	T	C	1.19	2.9e-33	1.22-1.16
rs2093436	1	114263735	A	G	0.84	2.9e-33	0.87-0.82
rs6663679	1	114264625	T	C	1.19	2.9e-33	1.22-1.16
chr1:114264978	1	114264978	A	G	0.49	4e-16	0.59-0.42
rs4423005	1	114265244	T	C	0.84	2.9e-33	0.87-0.82
rs1230642	1	114265491	A	G	0.83	9.8e-39	0.85-0.80
rs7553188	1	114265928	T	C	0.84	2.8e-33	0.87-0.82
rs1230640	1	114267347	T	C	0.84	2.8e-33	0.87-0.82
rs1981319	1	114267645	A	C	0.84	2.7e-33	0.87-0.82
rs10858015	1	114267951	T	C	1.11	1.5e-11	1.14-1.07
rs6674848	1	114268791	A	C	1.11	4.1e-10	1.14-1.07
rs10858016	1	114269977	A	G	1.18	6.6e-33	1.21-1.15
rs12752932	1	114270159	A	G	0.9	4.6e-10	0.93-0.88
rs4838998	1	114270326	A	C	0.85	9.6e-31	0.87-0.82
rs13374352	1	114270738	A	G	0.9	4.5e-10	0.93-0.88
rs1230639	1	114270907	A	G	1.19	2.7e-33	1.22-1.16
rs1230638	1	114271128	A	G	1.19	2.5e-33	1.22-1.16
rs1230637	1	114271423	T	C	1.21	8.3e-39	1.24-1.17
rs61817586	1	114275434	T	C	1.11	4.5e-10	1.14-1.07
rs12061482	1	114275437	T	C	1.19	2.3e-33	1.22-1.16
rs6537795	1	114275601	T	C	1.19	2.3e-33	1.22-1.16
rs7526209	1	114276725	T	C	0.85	5.2e-30	0.87-0.83
rs12063216	1	114277330	A	G	1.19	1.8e-33	1.22-1.16
rs2273758	1	114280717	A	C	1.18	1.7e-33	1.22-1.15
rs11102678	1	114282287	A	C	0.9	5.2e-12	0.93-0.87
chr1:114285860	1	114285860	A	T	1.95	2.8e-58	2.11-1.80
rs10858017	1	114287902	A	G	0.84	7.2e-34	0.86-0.82
rs4565712	1	114288280	T	G	0.84	7.9e-34	0.86-0.82
rs1230687	1	114290959	A	T	1.19	9.2e-34	1.22-1.16
rs1230686	1	114291406	A	G	0.84	1.2e-33	0.87-0.82
rs1230685	1	114292544	T	C	0.84	6.8e-34	0.86-0.82
rs1230684	1	114292809	T	C	1.11	5.3e-12	1.14-1.08
rs1230683	1	114293247	A	G	1.19	1.2e-33	1.22-1.16
rs1230682	1	114293526	A	G	0.84	9.1e-34	0.87-0.82
rs28831807	1	114295052	G	C	0.9	2.2e-11	0.93-0.87
rs12750414	1	114295054	T	C	1.19	5.2e-32	1.22-1.15
rs2797414	1	114295438	A	G	0.84	9.3e-34	0.87-0.82
rs1230681	1	114296664	A	T	1.11	5.6e-11	1.14-1.07
rs1230680	1	114296770	A	T	1.21	2.5e-38	1.25-1.18
rs1230679	1	114297775	A	T	1.19	5.7e-34	1.22-1.16
rs1230678	1	114298420	T	G	0.84	6.5e-34	0.86-0.82
rs2359167	1	114299516	A	G	1.21	1.3e-39	1.25-1.18
rs61817589	1	114301335	T	C	1.21	1.2e-39	1.25-1.18
rs2797412	1	114302966	T	C	1.19	4.8e-34	1.22-1.16
rs6679677	1	114303808	A	C	1.81	2.1e-149	1.89-1.73
rs1935836	1	114309172	T	C	1.11	4.7e-12	1.14-1.08
rs10858018	1	114311768	A	G	1.19	3.4e-34	1.23-1.16
rs4145859	1	114312435	G	C	0.82	8.1e-40	0.85-0.80
rs2040041	1	114312623	T	C	0.89	3.9e-12	0.92-0.86
rs12144309	1	114315493	T	C	0.88	1.5e-10	0.92-0.85
rs12041547	1	114316220	G	C	0.82	8.1e-40	0.85-0.80
rs1935838	1	114317791	T	C	1.19	2.3e-34	1.23-1.16
rs2636000	1	114318022	A	G	0.89	5.1e-12	0.92-0.87
rs12117799	1	114318604	T	C	0.87	1.1e-11	0.91-0.84
rs3789598	1	114318727	A	C	1.19	6e-34	1.22-1.15
rs10858019	1	114319233	A	C	0.84	3.8e-34	0.86-0.82
rs12044534	1	114319416	G	C	0.84	3.9e-34	0.86-0.82
rs17462614	1	114319513	T	C	0.9	1.9e-10	0.93-0.87
rs3789599	1	114323318	T	C	1.13	9.5e-14	1.16-1.09
rs2636008	1	114325914	A	G	0.84	1.3e-33	0.86-0.82
rs10127930	1	114328921	T	C	1.11	2.9e-10	1.14-1.07
rs2797408	1	114329408	T	C	1.2	2.4e-35	1.23-1.16
rs2797409	1	114330202	T	C	0.84	3.5e-33	0.87-0.82
rs6668829	1	114330453	T	C	0.9	3.1e-10	0.93-0.88
rs6672018	1	114331315	T	C	1.18	4.3e-33	1.21-1.15
rs2040040	1	114331645	A	T	0.9	3.1e-10	0.93-0.88
rs3789600	1	114334222	T	C	0.85	2.5e-32	0.87-0.83
rs1539437	1	114334690	A	C	0.85	2.6e-32	0.87-0.83
rs34042871	1	114335092	A	G	1.11	2.9e-10	1.14-1.07
rs61817617	1	114335483	A	T	1.11	2.9e-10	1.14-1.07
rs61817618	1	114335788	T	C	0.56	1.9e-39	0.61-0.51
rs1217396	1	114338236	T	C	0.84	3.8e-33	0.87-0.82
rs6703387	1	114341332	T	C	1.11	3e-10	1.14-1.07
rs1217380	1	114343336	A	G	0.84	2.2e-33	0.87-0.82
rs1217379	1	114344083	T	C	0.85	2.9e-32	0.87-0.83
rs1217378	1	114345418	T	C	0.85	2.9e-32	0.87-0.83
rs1217377	1	114345750	T	C	0.84	2.8e-33	0.87-0.82
rs1217376	1	114346749	A	C	1.19	7.2e-33	1.22-1.15
rs1217375	1	114346904	A	G	0.89	5.5e-13	0.92-0.86
rs34341173	1	114348942	A	G	0.9	2.9e-10	0.93-0.88
rs34649199	1	114350489	T	C	1.11	2.8e-10	1.14-1.07
rs6537798	1	114351706	A	C	0.85	2.8e-32	0.87-0.83
rs17509390	1	114353324	T	C	1.11	2.7e-10	1.14-1.07
rs55811970	1	114355237	A	G	1.92	9.7e-14	2.28-1.62
rs1217411	1	114356125	A	G	1.18	2.4e-32	1.21-1.15
rs1217412	1	114357211	A	G	0.84	2e-33	0.87-0.82
rs1217413	1	114357750	A	G	0.83	1.2e-38	0.85-0.80
rs9429730	1	114360067	T	G	1.18	1.2e-30	1.21-1.15
rs2476599	1	114363459	A	G	0.89	5.1e-13	0.92-0.86
rs1237682	1	114364104	T	C	1.21	8.7e-39	1.24-1.18
rs1217388	1	114364476	A	G	0.84	1.5e-33	0.87-0.82
rs1217389	1	114365752	T	C	0.84	1.5e-33	0.87-0.82
rs3789607	1	114366434	T	C	1.11	2.7e-10	1.14-1.07
rs7555634	1	114367116	T	C	0.85	2.4e-32	0.87-0.83
rs12735104	1	114367343	A	G	0.9	2.7e-10	0.93-0.88
rs10858021	1	114368777	T	G	0.84	6.5e-34	0.86-0.82
rs2797416	1	114369259	T	C	1.18	2.4e-32	1.21-1.15
rs4991898	1	114369468	T	G	1.18	2.6e-32	1.21-1.15
rs1746857	1	114369523	T	C	0.89	3.9e-12	0.92-0.86
rs2476600	1	114369734	A	G	1.18	2.6e-32	1.21-1.15
rs1310182	1	114373503	A	G	1.18	3.1e-32	1.21-1.15
rs1217395	1	114374435	T	C	0.84	1.4e-33	0.87-0.82
rs1599971	1	114377093	A	G	1.19	1.6e-33	1.22-1.15
rs1970559	1	114377148	T	C	1.12	6e-13	1.16-1.09
rs2476601	1	114377568	A	G	1.81	1e-149	1.90-1.74
rs12730735	1	114381457	T	C	1.11	2.9e-10	1.14-1.07
rs1217386	1	114383637	A	G	1.19	1.7e-33	1.22-1.15
rs7533391	1	114384259	T	C	0.9	2.4e-11	0.93-0.87
rs7555354	1	114384431	A	G	0.9	2.8e-10	0.93-0.88
rs7533605	1	114384474	T	C	0.9	2.8e-10	0.93-0.88
rs36115604	1	114384600	A	G	0.9	2.9e-10	0.93-0.88
rs71662845	1	114385679	A	G	0.9	2.9e-10	0.93-0.88
rs2185827	1	114386083	A	G	1.12	4.1e-12	1.16-1.08
rs12748727	1	114387905	A	G	0.9	3e-10	0.93-0.88
rs1217403	1	114388804	T	C	1.12	4e-12	1.16-1.08
rs12760457	1	114389748	T	C	0.9	3.1e-10	0.93-0.88
rs1217404	1	114392559	T	C	1.18	2.5e-32	1.21-1.15
rs1217405	1	114392632	A	G	1.18	3.2e-32	1.21-1.15
rs1217406	1	114393153	A	C	1.18	2.9e-32	1.21-1.15
rs1217407	1	114393748	A	G	1.19	1.6e-33	1.22-1.15
rs1217408	1	114396280	T	C	1.12	4.4e-13	1.16-1.09
rs34877889	1	114396369	A	T	0.9	2.7e-10	0.93-0.88
chr1:114396466	1	114396466	G	C	1.11	5.9e-10	1.14-1.07
rs1217409	1	114396735	G	C	0.85	2.6e-32	0.87-0.83
rs1217410	1	114396816	T	C	0.84	2e-33	0.87-0.82
rs2476602	1	114396955	A	G	0.89	4.2e-13	0.92-0.86
rs3789609	1	114397799	T	C	0.9	2.2e-10	0.93-0.87
rs1217416	1	114400804	T	C	0.83	1.7e-38	0.85-0.80
rs1217417	1	114400904	G	C	0.89	4e-12	0.92-0.86
rs1217418	1	114401231	A	G	1.18	2.3e-32	1.21-1.15
rs1217419	1	114401904	T	G	1.18	2.1e-32	1.21-1.15
rs1217420	1	114402751	A	G	1.18	2e-32	1.21-1.15
rs1217421	1	114402846	G	C	1.19	3e-33	1.22-1.15
rs1775754	1	114404901	T	C	0.84	8.7e-34	0.86-0.82
rs2243471	1	114406002	A	G	0.83	5.2e-39	0.85-0.80
rs2476604	1	114406444	A	T	0.85	2.4e-32	0.87-0.83
rs2488458	1	114406451	T	C	1.19	1e-33	1.22-1.16
rs7549685	1	114407321	A	G	0.89	1.1e-11	0.92-0.86
rs1217415	1	114407547	A	C	1.19	4.7e-29	1.22-1.15
rs1217414	1	114412667	A	G	0.89	4.2e-13	0.92-0.86
chr1:114415368	1	114415368	G	C	1.22	2.1e-39	1.25-1.18
rs11102689	1	114417034	A	T	1.19	6.3e-32	1.22-1.16
rs1235005	1	114417437	G	C	0.85	2.2e-33	0.87-0.82
rs6665194	1	114417843	A	G	1.18	3e-33	1.21-1.15
rs1217385	1	114418205	A	C	1.18	8.1e-33	1.21-1.15
rs1217384	1	114419760	G	C	0.9	1.3e-10	0.93-0.87
rs12566340	1	114420328	T	C	1.19	3e-33	1.22-1.16
rs7529353	1	114420462	A	G	1.19	4.9e-33	1.22-1.16
rs34857922	1	114420760	T	C	0.9	1.6e-10	0.93-0.88
rs11102691	1	114421313	T	C	1.19	9.5e-34	1.23-1.16
rs1217383	1	114422976	A	T	0.82	1.9e-38	0.84-0.79
rs1217382	1	114423653	T	C	0.9	2.2e-11	0.93-0.87
rs11102694	1	114426001	A	G	1.22	9.6e-39	1.26-1.19
rs7524200	1	114426824	T	G	0.87	1.7e-25	0.89-0.84
rs1217423	1	114427293	T	G	0.9	6.1e-13	0.92-0.87
rs2884603	1	114427450	A	G	0.87	1.7e-25	0.89-0.84
rs1746860	1	114429340	T	C	1.12	6.9e-13	1.15-1.08
rs2358994	1	114429461	A	G	1.2	1e-33	1.24-1.17
rs2358995	1	114429515	A	C	0.83	9.8e-34	0.86-0.81
rs7547478	1	114431463	A	G	1.2	8.1e-34	1.24-1.17
rs1217393	1	114433946	A	G	0.9	6.9e-13	0.92-0.87
rs1217392	1	114433970	T	G	1.15	8.3e-26	1.19-1.12
rs1217400	1	114436363	T	C	0.9	7.5e-13	0.92-0.87
rs10776775	1	114436482	A	G	1.15	1.8e-25	1.18-1.12
rs10745340	1	114436970	T	C	0.87	1.4e-25	0.89-0.84
rs11102695	1	114437060	T	C	0.91	3.8e-08	0.94-0.88
rs1217401	1	114438951	A	G	1.12	5.2e-13	1.15-1.08
rs1310183	1	114439522	T	C	1.12	5.6e-13	1.15-1.08
rs3789613	1	114443035	G	C	1.15	6.5e-26	1.19-1.12
rs7523862	1	114443419	A	G	1.16	6.1e-26	1.19-1.12
rs7513707	1	114445880	A	G	1.21	4.2e-36	1.25-1.18
rs10858022	1	114446341	A	G	0.87	1.5e-25	0.89-0.84
rs6661817	1	114447034	G	C	0.87	1.7e-25	0.89-0.84
rs1217397	1	114447565	A	G	0.9	1.2e-10	0.93-0.88
rs971173	1	114447914	T	G	0.9	9.6e-13	0.92-0.87
rs11552449	1	114448389	T	C	1.21	4.7e-36	1.25-1.18
rs10858023	1	114448752	T	C	1.15	9.7e-26	1.19-1.12
rs3761936	1	114449662	T	C	0.82	5.7e-37	0.85-0.80
rs11102702	1	114450964	T	C	0.82	1.3e-37	0.84-0.79
rs1217390	1	114451307	T	C	1.1	3e-11	1.13-1.07
rs12046289	1	114451386	A	G	1.19	6.9e-23	1.23-1.15
rs10563713	1	114451425	A	G	1.2	3.5e-23	1.24-1.16
rs72691846	1	114466659	T	C	0.61	2.6e-41	0.65-0.56
rs3811019	1	114471583	G	C	1.3	2.8e-35	1.35-1.25
rs17032011	1	114475350	A	G	1.23	2.3e-27	1.27-1.18
rs11102704	1	114477497	A	G	0.84	2.8e-22	0.87-0.81
rs12729894	1	114481962	T	G	0.91	4.4e-10	0.94-0.88
chr1:114482338	1	114482338	T	C	2.06	9.7e-14	2.49-1.70
rs3006981	1	114525588	A	C	1.18	2.4e-20	1.22-1.14
rs2938319	1	114525636	A	T	0.85	3.3e-20	0.88-0.82
rs937672	1	114526216	G	C	0.86	2.7e-18	0.89-0.83
rs17032048	1	114527375	A	C	1.17	2.2e-18	1.21-1.13
rs1158912	1	114527534	T	C	1.17	1e-18	1.21-1.13
rs1806735	1	114528368	T	C	1.22	1.8e-23	1.27-1.17
rs1806763	1	114528741	G	C	0.88	1.3e-13	0.91-0.85
rs2359001	1	114528987	A	G	0.88	1.3e-13	0.91-0.85
rs3006996	1	114529014	T	C	0.88	1.2e-13	0.91-0.85
rs924778	1	114529141	A	G	1.14	1.3e-13	1.17-1.10
rs12029840	1	114531480	T	C	1.21	2.5e-21	1.26-1.16
rs17032085	1	114532457	A	G	0.83	1.1e-22	0.86-0.80
rs7520320	1	114535293	T	C	1.16	9.4e-18	1.20-1.12
rs12029644	1	114536780	T	C	1.16	8.8e-18	1.20-1.12
rs11102712	1	114537037	T	C	1.16	8.7e-18	1.20-1.12
rs1503836	1	114541498	T	G	1.12	5.2e-17	1.15-1.09
chr1:114541869	1	114541869	G	C	0.65	6.4e-09	0.75-0.56
rs61819209	1	114546218	T	C	1.16	9.8e-16	1.21-1.12
rs10494164	1	114546528	A	G	0.86	9.9e-16	0.89-0.83
rs12563513	1	114547798	A	G	1.16	7.6e-16	1.21-1.12
chr1:114560636	1	114560636	A	G	1.9	5.3e-13	2.26-1.60
rs34382796	1	114564892	T	G	1.26	4.8e-08	1.36-1.16
rs4845373	1	154417829	T	C	0.93	2.7e-08	0.95-0.90
rs11265613	1	154418415	T	C	1.08	1.5e-08	1.11-1.05
rs4576655	1	154418749	T	C	0.93	3.5e-08	0.95-0.90
rs4537545	1	154418879	T	C	0.93	3.2e-08	0.95-0.90
rs12730935	1	154419892	A	G	0.92	4.1e-09	0.95-0.90
rs61812598	1	154420087	A	G	0.92	4.5e-09	0.95-0.90
rs7512646	1	154420402	G	C	1.08	1.9e-08	1.11-1.05
rs7529229	1	154420778	T	C	1.08	1.8e-08	1.11-1.05
rs12126142	1	154425456	A	G	0.92	3.5e-09	0.95-0.90
rs4129267	1	154426264	T	C	0.92	3.5e-09	0.95-0.90
rs2228145	1	154426970	A	C	1.08	3.5e-09	1.11-1.05
rs12133641	1	154428283	A	G	1.08	3.7e-09	1.11-1.05
rs7522061	1	157668390	T	C	0.93	4.6e-08	0.95-0.91
rs2210912	1	157668701	A	C	0.93	4.7e-08	0.95-0.91
rs2210913	1	157668993	T	C	1.08	4e-08	1.10-1.05
rs3761959	1	157669278	T	C	1.08	4e-08	1.10-1.05
rs945635	1	157670290	G	C	1.08	4.2e-08	1.10-1.05
rs7528684	1	157670816	A	G	0.93	4.4e-08	0.95-0.91
rs2317230	1	157674997	T	G	1.08	2.1e-08	1.11-1.05
rs2317231	1	157686337	T	G	1.08	3.8e-08	1.11-1.05
rs61828284	1	173299743	T	C	0.82	8.5e-09	0.88-0.77
rs61828285	1	173301766	A	G	0.82	1.4e-08	0.88-0.76
rs6681482	1	173306646	A	G	0.9	5.5e-10	0.93-0.87
rs12736195	1	173307901	T	C	1.1	1.3e-08	1.13-1.06
rs6681162	1	173310061	A	T	1.11	4.9e-10	1.15-1.07
rs34972373	1	173310742	T	C	0.9	4.8e-10	0.93-0.87
rs34746916	1	173310806	A	G	1.11	4.8e-10	1.15-1.07
rs12742673	1	173311999	A	G	0.9	4.6e-10	0.93-0.87
rs1539258	1	173312583	A	C	1.11	4.6e-10	1.15-1.07
rs4916215	1	173314540	T	C	1.11	6.3e-10	1.14-1.07
rs17346550	1	173315625	T	C	1.11	6.3e-10	1.14-1.07
rs12750865	1	173315876	T	C	1.11	6.6e-10	1.14-1.07
rs11577537	1	173318329	A	G	0.9	6.1e-10	0.93-0.87
rs2027499	1	173319839	A	G	0.9	5.6e-10	0.93-0.87
rs11576547	1	173323918	T	C	1.11	5.1e-10	1.14-1.07
rs11577727	1	173326832	A	G	1.11	5.1e-10	1.14-1.07
rs35407548	1	173327347	T	C	1.11	5e-10	1.14-1.07
rs7528321	1	173331762	T	C	0.9	5.2e-10	0.93-0.87
rs1857066	1	173332629	A	C	0.9	5.3e-10	0.93-0.87
rs2027498	1	173333819	A	G	0.9	5.2e-10	0.93-0.87
rs2153775	1	173337582	T	G	1.11	5.1e-10	1.14-1.07
rs10912600	1	173338708	T	C	0.9	4.6e-10	0.93-0.87
rs35538218	1	173339969	A	C	0.89	4.2e-08	0.93-0.85
rs12723393	1	173340087	G	C	0.89	4.2e-08	0.93-0.85
rs2422349	1	173340809	T	G	1.11	4.6e-10	1.14-1.07
rs4382762	1	173340972	A	G	1.11	4.5e-10	1.14-1.07
rs10912602	1	173341999	A	G	1.11	4.4e-10	1.14-1.07
rs11802759	1	173342327	A	G	0.9	4.5e-10	0.93-0.87
rs4916340	1	173347474	T	G	1.11	3.8e-10	1.15-1.07
rs2105325	1	173349725	A	C	0.9	3.1e-10	0.93-0.87
rs1557121	1	173353881	T	C	0.9	3.6e-10	0.93-0.87
rs10173253	2	30443460	A	G	1.08	1e-08	1.12-1.06
rs7579944	2	30445026	T	C	0.92	1.4e-08	0.95-0.90
rs1355208	2	30445322	A	G	0.92	1.1e-08	0.95-0.90
rs12473138	2	30447432	T	C	1.09	1.1e-08	1.12-1.06
rs906868	2	30448344	T	G	1.09	7.4e-09	1.12-1.06
rs10175798	2	30449594	A	G	1.09	5.4e-09	1.12-1.06
rs10182034	2	30451253	G	C	0.92	3.9e-08	0.95-0.90
rs35742507	2	61056644	A	G	0.89	1.4e-08	0.92-0.85
rs1432296	2	61068167	T	C	1.13	3.5e-09	1.18-1.09
rs56095903	2	61072664	T	G	1.12	4.2e-13	1.15-1.08
chr2:61083504	2	61083504	A	G	0.9	8.1e-13	0.92-0.87
rs62149416	2	61083506	T	C	0.9	8.1e-13	0.92-0.87
rs62149417	2	61083563	A	G	1.12	8.1e-13	1.15-1.08
rs62149419	2	61090226	T	C	0.9	1.4e-11	0.93-0.87
rs12466919	2	61092858	T	C	1.12	5.7e-13	1.15-1.08
rs55963299	2	61097583	A	G	0.9	1.1e-12	0.92-0.87
rs13019590	2	61099420	A	C	0.9	7.8e-13	0.92-0.87
rs13031721	2	61106471	A	G	0.9	4.7e-13	0.92-0.87
rs67574266	2	61108829	A	G	1.12	3.5e-13	1.15-1.08
rs34023434	2	61122317	T	C	1.13	1.2e-08	1.17-1.08
rs34695944	2	61124850	T	C	0.89	2.6e-13	0.92-0.87
rs13026050	2	61136013	A	G	1.13	1.2e-08	1.17-1.08
rs13031237	2	61136129	T	G	1.12	5.6e-13	1.15-1.08
rs12989427	2	61137506	A	G	1.13	2.4e-08	1.17-1.08
rs34518355	2	61153803	A	G	1.11	1.1e-11	1.15-1.08
rs13026755	2	61160619	T	C	1.11	1e-11	1.15-1.08
rs13017599	2	61164331	A	G	1.12	1.3e-12	1.15-1.08
rs13014803	2	61167216	T	C	0.89	4.3e-08	0.93-0.86
rs7561932	2	65545068	T	C	1.1	9.5e-10	1.14-1.07
rs7601094	2	65545348	T	C	0.91	1.1e-09	0.94-0.88
rs7601514	2	65545702	T	C	0.91	3.7e-09	0.94-0.89
rs1542994	2	65554415	A	G	1.11	1e-10	1.14-1.07
rs6546146	2	65556324	A	C	0.9	6.3e-12	0.93-0.88
rs871974	2	65557287	T	C	1.1	4.8e-11	1.13-1.07
rs6727013	2	65558375	A	C	0.91	5.6e-11	0.94-0.88
rs2271198	2	65559027	A	G	1.1	5.8e-12	1.13-1.07
rs7581149	2	65559641	T	C	0.91	8.1e-12	0.93-0.88
rs4671658	2	65561392	T	C	0.91	5e-11	0.94-0.88
rs4671127	2	65562970	G	C	0.9	4.3e-14	0.92-0.87
chr2:65565619	2	65565619	A	G	0.91	3.9e-11	0.94-0.88
rs35076561	2	65566507	T	C	1.1	2.1e-11	1.13-1.07
rs34975324	2	65566557	T	C	1.1	3e-11	1.13-1.07
rs953312	2	65567690	T	C	0.91	3.4e-11	0.93-0.88
rs9789444	2	65569227	T	C	1.1	2.6e-11	1.13-1.07
rs10188563	2	65569939	A	G	1.1	7.4e-12	1.13-1.07
rs1553675	2	65570307	A	G	1.1	2.6e-11	1.13-1.07
rs67817304	2	65574116	T	C	0.91	3.1e-11	0.93-0.88
rs955903	2	65575553	A	G	1.12	3.4e-14	1.15-1.08
rs4671659	2	65576286	T	C	0.91	4.7e-11	0.94-0.88
chr2:65576306	2	65576306	A	C	1.1	4e-08	1.14-1.06
rs62139117	2	65576415	A	G	1.1	3.7e-08	1.14-1.06
rs4671660	2	65576436	A	C	0.91	2.7e-11	0.93-0.88
rs10186240	2	65577651	T	G	1.1	6e-12	1.13-1.07
rs7559283	2	65578368	T	C	0.91	5.5e-12	0.93-0.88
rs6711791	2	65579228	T	G	0.91	1.5e-11	0.94-0.89
rs11126034	2	65580221	T	C	1.12	2.1e-14	1.15-1.09
rs7584295	2	65581074	T	C	1.12	2.1e-14	1.15-1.09
rs11695373	2	65581200	A	G	1.12	2e-14	1.15-1.09
rs11684155	2	65581300	T	C	0.9	2.2e-14	0.92-0.87
rs12612780	2	65583101	A	G	1.1	1.9e-11	1.13-1.07
rs1396210	2	65584274	A	G	1.1	4.1e-12	1.13-1.07
rs67453645	2	65586042	T	C	0.91	1.7e-11	0.93-0.88
rs35470201	2	65587124	T	C	0.91	1.6e-11	0.93-0.88
rs57913336	2	65587619	A	G	0.91	1.6e-11	0.93-0.88
rs4494728	2	65589513	T	C	0.91	1.1e-11	0.94-0.89
rs4549071	2	65589656	A	G	1.1	1.1e-11	1.13-1.07
rs4289177	2	65589693	T	C	1.1	1.1e-11	1.13-1.07
rs6715061	2	65590336	A	G	0.92	8.7e-10	0.94-0.89
rs61226353	2	65590771	A	G	0.91	1.8e-11	0.93-0.88
rs6738087	2	65592325	T	C	1.1	4.7e-12	1.13-1.07
rs934734	2	65595586	A	G	0.9	2.1e-13	0.93-0.88
rs906577	2	65596657	A	G	1.12	1.5e-14	1.15-1.09
rs11126035	2	65597066	T	C	1.12	1.4e-14	1.15-1.09
rs67404371	2	65597271	A	C	0.91	1.4e-11	0.93-0.88
rs11673956	2	65597657	A	G	1.12	1.6e-14	1.15-1.09
rs11673987	2	65597671	A	G	1.12	1.3e-14	1.15-1.09
rs1858036	2	65598241	A	G	1.12	1.2e-14	1.15-1.09
rs1858037	2	65598300	A	T	0.89	1.2e-14	0.92-0.87
rs1396209	2	65601234	A	G	1.1	9.4e-12	1.14-1.07
chr2:65601598	2	65601598	A	T	1.11	6.4e-14	1.14-1.08
rs906578	2	65601600	A	C	1.11	6.4e-14	1.14-1.08
rs268122	2	65602109	A	T	0.9	5.9e-14	0.93-0.88
chr2:65602149	2	65602149	T	C	1.11	2e-13	1.14-1.08
rs174847	2	65605194	T	C	1.11	7.4e-14	1.14-1.08
rs2118305	2	65605220	A	C	1.1	8.5e-12	1.14-1.07
rs11689314	2	65605408	T	G	1.11	6.9e-14	1.14-1.08
rs17475335	2	65605780	G	C	1.1	9e-12	1.14-1.07
rs1194849	2	65606653	T	C	0.9	1.4e-13	0.93-0.88
rs268139	2	65606991	A	C	0.9	1.5e-13	0.93-0.88
rs198478	2	65607011	A	G	0.9	1.4e-13	0.93-0.88
rs268138	2	65607294	A	G	0.91	5.1e-12	0.93-0.88
rs268136	2	65607543	T	C	1.11	1.4e-13	1.14-1.08
rs1876518	2	65608909	T	C	1.11	1.3e-13	1.14-1.08
rs876933	2	65609437	T	C	0.91	1.1e-11	0.93-0.88
rs268132	2	65609677	T	C	0.9	1.3e-13	0.93-0.88
rs268131	2	65610471	A	T	1.11	1.1e-13	1.14-1.08
rs702875	2	65614197	T	C	1.11	1.7e-13	1.14-1.08
rs1039765	2	65614362	A	T	0.91	6.4e-12	0.93-0.88
rs1039764	2	65614613	T	C	0.9	9.7e-14	0.93-0.88
rs72621551	2	65615221	T	C	0.91	6.1e-12	0.93-0.88
rs55945621	2	65615354	A	G	0.91	6.3e-12	0.93-0.88
rs17534670	2	65615428	A	G	0.9	1.8e-13	0.93-0.88
rs1973566	2	65618126	A	G	0.91	6e-12	0.93-0.88
rs4303705	2	65619710	T	C	1.11	9.2e-14	1.14-1.08
rs964505	2	65623189	A	G	0.91	8.5e-12	0.93-0.88
rs4671662	2	65624960	A	C	0.91	9.6e-12	0.93-0.88
rs12052827	2	65626178	G	C	0.91	8.9e-12	0.93-0.88
chr2:65626556	2	65626556	T	G	0.91	9.6e-12	0.93-0.88
rs2661795	2	65626806	T	C	1.11	9.1e-14	1.14-1.08
rs2661796	2	65627406	T	C	0.9	8.8e-14	0.93-0.88
rs55633417	2	65628788	T	C	0.91	1.3e-11	0.93-0.88
rs2661797	2	65633190	A	G	1.11	8.3e-14	1.14-1.08
rs2576923	2	65633884	A	G	0.91	1.3e-11	0.93-0.88
rs2661798	2	65635688	A	T	0.9	4.1e-14	0.93-0.88
rs2661799	2	65635872	A	G	0.91	1.1e-11	0.93-0.88
rs2661794	2	65639543	A	C	1.11	5.2e-13	1.14-1.08
rs6731993	2	65642097	A	T	0.92	6.8e-09	0.95-0.89
rs7557569	2	65644561	T	C	0.92	3.1e-09	0.94-0.89
rs62141075	2	65644616	T	C	1.09	3.4e-09	1.12-1.06
rs13383320	2	65645137	A	C	1.09	3.2e-09	1.12-1.06
rs10166100	2	65645750	T	C	1.09	3.4e-09	1.12-1.06
rs10166362	2	65645774	A	G	1.09	3.4e-09	1.12-1.06
rs7565437	2	65646966	T	C	0.92	2.5e-09	0.94-0.89
rs10153675	2	65649580	A	G	1.09	3.3e-09	1.12-1.06
rs55792977	2	65650864	T	G	1.09	2.9e-09	1.12-1.06
rs7583469	2	65651356	T	C	0.91	3.4e-10	0.94-0.89
rs12470883	2	65651851	A	G	1.09	2.8e-09	1.12-1.06
rs7572922	2	65652156	T	C	1.09	2.1e-09	1.12-1.06
rs2028150	2	65655012	G	C	1.09	2.8e-09	1.12-1.06
rs2028151	2	65655613	A	T	0.92	2.7e-09	0.94-0.89
rs7569084	2	65656969	T	C	1.1	2.8e-10	1.13-1.06
rs7569257	2	65656976	A	G	1.09	2.6e-09	1.12-1.06
rs7569113	2	65657041	T	C	1.09	2.7e-09	1.12-1.06
rs7576126	2	65658369	A	G	1.09	1.8e-09	1.12-1.06
rs12185577	2	65659488	A	G	0.92	2.4e-09	0.94-0.89
rs7584078	2	65660978	A	C	1.09	2.3e-09	1.12-1.06
rs12185610	2	65661468	A	C	0.92	2.3e-09	0.94-0.89
rs13385171	2	65661843	T	C	0.91	2.1e-10	0.94-0.89
rs1807337	2	65663167	G	C	0.92	1.5e-09	0.94-0.89
rs1437466	2	65664350	T	C	1.09	2.1e-09	1.12-1.06
rs2860773	2	65665641	T	G	1.09	5.3e-09	1.12-1.06
rs6752053	2	65666674	T	C	0.92	5.2e-09	0.95-0.89
rs62141115	2	65672192	A	G	0.92	4.6e-09	0.95-0.89
rs6546151	2	65676583	A	G	1.09	3.2e-09	1.12-1.06
rs10184881	2	65684152	A	G	0.92	2.7e-09	0.94-0.89
rs11887597	2	100576807	T	C	1.08	4.2e-08	1.11-1.05
rs10177463	2	100602518	T	C	1.08	4.1e-09	1.11-1.05
rs11685341	2	100636757	T	C	0.92	1.1e-08	0.95-0.90
rs12997584	2	100640432	T	C	1.09	1.1e-09	1.12-1.06
rs961788	2	100641459	T	C	1.08	2.3e-09	1.11-1.06
rs11123805	2	100643464	A	G	1.08	2.2e-09	1.11-1.06
rs7605430	2	100647552	G	C	0.92	1.7e-09	0.95-0.90
rs1115910	2	100647872	A	G	1.09	1.4e-09	1.11-1.06
rs12995420	2	100652578	T	C	1.09	1.3e-09	1.11-1.06
rs1062143	2	100659796	A	G	1.09	4.4e-10	1.12-1.06
rs2871326	2	100662010	T	C	1.09	5.2e-10	1.12-1.06
rs6733895	2	100666082	G	C	0.92	3.8e-10	0.94-0.89
rs10209110	2	100672692	T	C	0.92	1e-10	0.94-0.89
rs1370356	2	100675241	G	C	1.09	5.5e-09	1.12-1.06
rs11681737	2	100679024	T	C	1.08	9.7e-09	1.11-1.05
rs1821829	2	100680383	A	C	1.09	1.3e-10	1.12-1.06
rs1821828	2	100680401	A	C	0.92	9e-09	0.95-0.90
rs2309748	2	100681449	A	T	1.08	9.6e-09	1.11-1.05
rs6714788	2	100686173	T	C	0.92	8.8e-11	0.94-0.89
rs7582731	2	100686486	T	C	1.09	8.6e-11	1.12-1.06
rs2576678	2	100704810	T	C	1.09	9.4e-11	1.12-1.06
chr2:100708324	2	100708324	T	C	1.09	6.4e-10	1.12-1.06
chr2:100711194	2	100711194	A	C	1.09	3.1e-08	1.13-1.06
chr2:100719149	2	100719149	A	G	0.92	6.9e-11	0.94-0.89
rs10211595	2	100726476	G	C	1.09	8.2e-11	1.12-1.06
rs6749757	2	100730111	A	C	0.92	1e-10	0.94-0.90
rs11694875	2	100732845	T	C	0.92	1.8e-11	0.94-0.89
rs6732141	2	100743492	G	C	1.1	3.3e-12	1.13-1.07
rs7565967	2	100744683	T	G	0.91	7.4e-12	0.94-0.89
rs2164712	2	100745404	G	C	0.92	2.3e-09	0.95-0.90
rs2118280	2	100746395	A	G	0.92	7.5e-10	0.94-0.90
rs1561230	2	100746642	A	G	1.1	2.2e-12	1.12-1.07
rs11885529	2	100746935	A	G	1.1	2.2e-12	1.12-1.07
rs7575877	2	100750218	A	C	1.1	2.8e-12	1.12-1.07
rs11681227	2	100754997	A	G	1.1	4.5e-12	1.13-1.07
rs13032454	2	100756009	T	C	1.1	4.2e-12	1.13-1.07
rs12712064	2	100756548	T	C	0.91	4.3e-12	0.93-0.89
rs4851252	2	100757280	T	C	0.91	4.5e-12	0.93-0.89
rs11123809	2	100758137	T	C	0.91	1.6e-11	0.94-0.89
rs11900482	2	100758709	G	C	1.1	4.1e-12	1.13-1.07
rs13003982	2	100759078	T	C	1.1	4.2e-12	1.13-1.07
rs11123810	2	100759285	T	C	1.1	4.2e-12	1.13-1.07
rs11681966	2	100759457	A	C	0.91	4.1e-12	0.93-0.89
chr2:100759476	2	100759476	T	C	1.1	3.4e-14	1.13-1.08
chr2:100759477	2	100759477	A	G	0.91	4.2e-12	0.93-0.89
rs11123811	2	100760172	T	C	1.1	3.3e-14	1.13-1.08
rs12712065	2	100761105	G	C	0.91	4.7e-14	0.93-0.88
rs12987209	2	100761148	T	C	0.91	4.6e-12	0.94-0.89
rs12987212	2	100761156	T	C	0.91	4.6e-12	0.94-0.89
rs11690905	2	100761473	A	G	1.1	4.4e-12	1.13-1.07
rs11123812	2	100761548	T	C	1.1	4.5e-12	1.13-1.07
rs2309752	2	100762169	A	T	0.91	3.1e-14	0.93-0.88
rs4850921	2	100762699	T	G	0.91	3.8e-12	0.93-0.89
rs4851253	2	100762786	T	G	1.1	1.2e-11	1.12-1.07
rs12712067	2	100763900	T	G	0.91	3.6e-12	0.93-0.89
rs13415465	2	100764004	T	G	1.1	3.7e-12	1.13-1.07
rs13415583	2	100764087	T	G	1.1	3.6e-12	1.13-1.07
rs10496344	2	100764125	T	C	1.1	3e-12	1.13-1.07
rs12712068	2	100764439	A	G	1.1	4.1e-12	1.13-1.07
rs1821826	2	100764711	T	C	0.91	4.7e-12	0.94-0.89
rs1821827	2	100764717	T	C	1.1	4.6e-12	1.13-1.07
rs1370353	2	100764824	G	C	1.1	4.2e-12	1.13-1.07
rs2009094	2	100765077	A	G	0.91	4.2e-12	0.93-0.89
rs2009095	2	100765081	T	C	0.91	3.9e-12	0.93-0.89
rs11123813	2	100765692	T	C	0.91	3.8e-12	0.93-0.89
rs11899489	2	100766253	A	C	1.1	4.6e-12	1.13-1.07
rs4490209	2	100766711	G	C	0.91	4.4e-12	0.93-0.89
rs11123814	2	100767082	A	G	1.1	5e-12	1.13-1.07
rs6707067	2	100767232	A	G	0.91	1.3e-11	0.94-0.89
rs12992234	2	100767886	A	G	0.91	1.3e-11	0.94-0.89
rs7606455	2	100768241	T	C	1.09	1.9e-11	1.12-1.07
rs4452166	2	100768879	A	G	1.09	9.9e-11	1.12-1.06
rs4300851	2	100769261	T	C	1.1	5e-12	1.13-1.07
rs11675737	2	100770671	A	T	0.91	4.5e-12	0.93-0.89
rs36026386	2	100771741	T	C	1.1	4.5e-12	1.13-1.07
rs4851255	2	100771854	T	C	0.91	3.7e-12	0.93-0.89
rs4273243	2	100772113	T	C	0.91	4.5e-12	0.93-0.89
rs9679706	2	100773229	T	C	0.91	3.5e-12	0.93-0.88
rs9679713	2	100773303	T	C	0.91	3.8e-08	0.94-0.88
rs4499444	2	100773609	G	C	0.91	4.7e-12	0.93-0.89
rs7565895	2	100774773	A	G	0.91	4.5e-12	0.93-0.89
rs4851256	2	100775045	T	C	1.1	1.3e-11	1.12-1.07
rs4851257	2	100775297	T	C	0.91	5e-12	0.94-0.89
rs2164711	2	100775422	T	G	0.91	5.4e-12	0.94-0.89
rs2309753	2	100775920	A	C	0.91	5.6e-12	0.94-0.89
rs10168615	2	100776594	A	G	1.1	1.9e-11	1.12-1.07
rs2309755	2	100779749	A	G	0.91	1.2e-11	0.94-0.89
rs2309756	2	100780269	G	C	1.1	4.2e-12	1.13-1.07
rs4851258	2	100780830	T	C	1.1	4.3e-12	1.13-1.07
rs4851259	2	100781011	A	C	1.1	3.6e-12	1.13-1.07
rs4851260	2	100781132	G	C	0.91	1.4e-11	0.94-0.89
rs12712070	2	100781239	A	C	0.91	4.2e-12	0.93-0.89
rs6729966	2	100781566	A	G	1.09	1.7e-11	1.12-1.07
rs6715254	2	100781612	G	C	0.91	1.6e-11	0.94-0.89
rs6542915	2	100781646	A	G	0.91	5e-12	0.93-0.89
rs4850923	2	100782256	A	C	1.1	3.9e-12	1.13-1.07
rs4850924	2	100782273	A	G	1.1	1.2e-11	1.12-1.07
rs10176782	2	100782827	A	C	0.91	3.9e-12	0.93-0.89
rs13013594	2	100784190	A	G	1.1	3.9e-12	1.13-1.07
rs4851261	2	100786717	A	G	1.1	4.1e-12	1.13-1.07
rs11687586	2	100789346	A	G	1.1	1.1e-11	1.12-1.07
rs7601892	2	100789490	A	G	0.91	1.1e-11	0.94-0.89
rs7590378	2	100789877	A	G	1.1	1.2e-11	1.13-1.07
rs7593261	2	100789907	T	C	1.1	1.2e-11	1.13-1.07
rs10185059	2	100790172	T	C	0.91	3.6e-12	0.93-0.89
rs10185510	2	100790581	T	C	0.91	3.6e-12	0.93-0.89
rs10197987	2	100790783	A	T	1.1	1.7e-11	1.12-1.07
rs12712071	2	100793876	A	G	0.91	2.4e-12	0.93-0.89
rs11891046	2	100794402	G	C	0.91	6.9e-12	0.94-0.89
rs56054309	2	100794940	T	C	1.1	7.3e-12	1.13-1.07
rs11902705	2	100795207	A	G	0.91	9.4e-12	0.94-0.89
rs13005282	2	100795926	A	G	1.1	2.3e-12	1.13-1.07
rs7608424	2	100796543	T	G	0.9	1.8e-14	0.93-0.88
rs11677053	2	100801198	T	C	1.09	4.1e-11	1.12-1.06
rs10167029	2	100804992	T	C	1.09	2.6e-11	1.12-1.07
rs12712073	2	100805128	T	C	1.09	2.4e-11	1.12-1.07
rs10167279	2	100805273	A	T	0.91	1.3e-11	0.94-0.89
rs6712515	2	100806514	T	C	1.11	6.7e-15	1.14-1.08
rs6709656	2	100806719	A	G	1.08	3.5e-08	1.11-1.05
rs11676922	2	100806940	A	T	0.9	8.6e-15	0.93-0.88
rs2309757	2	100807725	T	C	1.08	3.6e-08	1.11-1.05
rs4851264	2	100810188	T	C	1.08	2.8e-08	1.11-1.05
rs7580200	2	100811903	A	C	1.11	1.4e-14	1.14-1.08
rs7566527	2	100811970	T	C	0.93	2.7e-08	0.95-0.90
rs6750505	2	100813327	A	G	0.93	2.7e-08	0.95-0.90
rs6740612	2	100813331	T	C	1.09	6.6e-11	1.12-1.06
rs6740838	2	100813499	T	G	1.09	7.5e-11	1.12-1.06
rs13013169	2	100814087	A	C	1.08	2.7e-08	1.11-1.05
rs893245	2	100814893	T	C	0.92	6.6e-11	0.94-0.89
rs893246	2	100814917	T	C	1.08	1.2e-08	1.11-1.05
rs10496345	2	100817619	T	G	1.08	2.6e-08	1.11-1.05
rs12991254	2	100817933	T	C	1.08	2.8e-08	1.11-1.05
rs4851266	2	100818479	T	C	0.93	2.7e-08	0.95-0.90
rs11689199	2	100820421	A	G	1.08	1.9e-08	1.11-1.05
rs11689201	2	100820431	A	G	1.08	8.7e-09	1.11-1.05
rs13018640	2	100821545	T	C	1.08	2.1e-08	1.11-1.05
rs12987662	2	100821548	A	C	0.93	2.1e-08	0.95-0.90
rs4851267	2	100824104	A	G	0.93	3e-08	0.95-0.90
rs11687241	2	100824595	A	G	1.08	3.9e-08	1.10-1.05
rs9653442	2	100825367	T	C	0.9	9.9e-15	0.93-0.88
rs4851268	2	100825864	T	C	0.93	4.1e-08	0.95-0.91
rs11695383	2	100826098	T	G	0.93	4.2e-08	0.95-0.91
rs11691409	2	100826165	A	T	0.93	4.2e-08	0.95-0.91
rs11690335	2	100826429	A	G	1.08	4.3e-08	1.10-1.05
rs11684761	2	100826871	A	C	0.93	4.3e-08	0.95-0.91
rs12990462	2	100827216	A	G	0.93	4.3e-08	0.95-0.91
rs12992090	2	100827340	T	C	0.93	4.3e-08	0.95-0.91
rs6754937	2	100827720	T	G	1.09	4.1e-10	1.12-1.06
rs11693324	2	100827753	T	C	1.08	4.2e-08	1.10-1.05
rs11686372	2	100827907	A	C	0.93	4.2e-08	0.95-0.91
rs4303732	2	100830040	T	C	1.08	3.9e-08	1.10-1.05
rs4851269	2	100830348	T	C	1.09	2.6e-10	1.12-1.06
rs1160542	2	100832155	A	G	0.9	1.6e-14	0.93-0.88
rs1160543	2	100832182	T	C	0.93	3.8e-08	0.95-0.91
rs1160544	2	100832218	A	C	1.09	2.8e-10	1.12-1.06
rs1160545	2	100832269	T	C	0.93	3.9e-08	0.95-0.91
rs4851270	2	100832656	T	C	1.08	3.9e-08	1.10-1.05
rs4851271	2	100833058	T	C	1.08	4e-08	1.10-1.05
rs13034176	2	100833913	A	G	0.93	3.9e-08	0.95-0.91
rs10194635	2	100834217	A	T	0.92	1e-10	0.94-0.89
rs1122231	2	100834546	T	C	0.93	3.8e-08	0.95-0.91
rs1465800	2	100834777	T	C	1.08	3.8e-08	1.10-1.05
rs11123817	2	100835032	T	C	0.93	3.8e-08	0.95-0.91
rs10865035	2	100835734	A	G	1.1	3.7e-14	1.13-1.08
rs1465801	2	100836060	T	C	0.93	3.8e-08	0.95-0.91
rs999052	2	100836106	T	C	0.93	3.8e-08	0.95-0.91
rs6750097	2	100836885	T	C	1.08	3.7e-08	1.10-1.05
rs4583487	2	100837126	T	G	0.93	3.7e-08	0.95-0.90
rs2309837	2	100837567	T	C	1.09	9.8e-11	1.12-1.06
rs12619178	2	100838157	T	C	0.93	3.6e-08	0.95-0.90
rs2309838	2	100838455	T	C	1.08	3.7e-08	1.11-1.05
rs2871344	2	100839430	A	G	1.08	3e-08	1.11-1.05
rs13017207	2	100841235	A	G	0.93	3.5e-08	0.95-0.90
rs13026283	2	100842638	T	C	0.93	3.1e-08	0.95-0.90
rs6542920	2	100845088	A	G	1.08	6.4e-09	1.11-1.05
rs4851273	2	100848321	A	G	1.08	2.4e-09	1.11-1.06
rs7597861	2	100853187	A	G	0.92	1.8e-09	0.95-0.90
rs12474386	2	100857017	A	G	0.91	1.8e-12	0.93-0.89
rs6739695	2	100859622	A	G	1.09	1.5e-09	1.11-1.06
rs10865036	2	100860595	T	C	1.09	1.4e-09	1.11-1.06
rs2309811	2	100862359	A	G	1.09	1.5e-09	1.11-1.06
rs6737502	2	100862903	T	C	0.92	1.2e-09	0.95-0.90
rs6542921	2	100864498	A	C	0.92	1e-09	0.95-0.90
rs11123819	2	100868708	A	T	0.93	3.8e-08	0.95-0.90
rs4851274	2	100870862	T	C	1.08	3.8e-09	1.11-1.06
rs3024886	2	191900449	A	G	1.12	7.5e-14	1.15-1.09
rs3821236	2	191902758	A	G	1.12	6.6e-14	1.15-1.09
rs3024877	2	191904889	T	C	1.09	1.2e-09	1.12-1.06
rs12469996	2	191912532	T	C	0.92	2.2e-09	0.95-0.90
rs12465689	2	191912540	T	C	1.12	3e-14	1.16-1.09
rs16833214	2	191913642	A	G	0.89	3.1e-14	0.92-0.86
rs16833215	2	191913799	A	G	0.92	2.1e-09	0.95-0.90
rs11893432	2	191921874	G	C	1.13	1.2e-14	1.16-1.09
rs1818625	2	191923026	T	C	1.09	1.5e-08	1.12-1.06
rs3024859	2	191925424	T	C	1.14	4.2e-16	1.17-1.10
rs13426947	2	191933254	A	G	1.14	1.6e-16	1.17-1.10
rs13389408	2	191933283	T	C	0.85	8.4e-12	0.89-0.81
rs10168266	2	191935804	T	C	1.14	6.9e-17	1.18-1.11
rs11889341	2	191943742	T	C	1.14	6.7e-19	1.18-1.11
rs12612769	2	191953998	A	C	0.87	5.3e-18	0.90-0.84
rs10207044	2	191958581	T	C	1.15	5.6e-11	1.20-1.10
rs4274624	2	191958656	T	C	0.88	5.7e-18	0.90-0.85
rs4853458	2	191959489	A	G	1.14	5.4e-18	1.17-1.11
rs10178640	2	191960109	A	T	0.89	4.3e-16	0.91-0.86
rs4853459	2	191962096	T	C	1.13	4.7e-16	1.16-1.10
rs7574865	2	191964633	T	G	1.14	4.6e-18	1.17-1.11
rs7568275	2	191966452	G	C	1.14	2.9e-18	1.17-1.11
rs8179673	2	191969341	T	C	0.88	5.2e-18	0.90-0.85
rs10181656	2	191969879	G	C	1.14	4e-18	1.17-1.11
rs7582694	2	191970120	G	C	0.88	4e-18	0.90-0.85
rs10174238	2	191973034	A	G	0.88	1.2e-13	0.91-0.85
rs11681201	2	204608177	A	T	0.89	2e-10	0.93-0.86
rs1980421	2	204610004	A	G	1.12	6.6e-12	1.16-1.09
rs1980422	2	204610396	T	C	0.89	6.4e-12	0.92-0.86
rs7422494	2	204611807	A	G	0.89	8.9e-12	0.92-0.86
rs7426056	2	204612058	A	G	1.12	9e-12	1.16-1.08
rs7588874	2	204614508	A	G	0.89	9.6e-12	0.92-0.86
rs10932018	2	204627407	A	G	0.92	1.3e-08	0.95-0.90
rs12467195	2	204628328	A	G	1.08	1.3e-08	1.11-1.05
rs10932019	2	204628810	A	G	0.92	1.4e-08	0.95-0.90
rs1974996	2	204629421	T	C	0.92	1.4e-08	0.95-0.90
rs4673265	2	204631738	T	C	0.92	1.3e-08	0.95-0.90
rs7420136	2	204632071	T	C	0.92	1.3e-08	0.95-0.90
rs10210464	2	204632810	T	C	1.08	1.5e-08	1.11-1.05
rs231387	2	204632931	A	G	1.08	1.6e-08	1.11-1.05
rs10932020	2	204633156	A	G	0.92	1.6e-08	0.95-0.90
rs10932021	2	204633260	A	C	0.92	1.7e-08	0.95-0.90
rs4673266	2	204634569	A	T	0.9	7.8e-11	0.93-0.87
rs231389	2	204634730	T	C	0.9	9.2e-11	0.93-0.87
rs13429019	2	204635693	T	C	1.11	1e-10	1.15-1.08
rs2558210	2	204636190	A	G	1.09	5.3e-09	1.12-1.06
rs10170254	2	204643999	A	G	1.09	6.5e-09	1.12-1.06
rs2882969	2	204646188	G	C	1.09	7.9e-09	1.12-1.06
rs749933	2	204647261	A	G	1.09	5.1e-09	1.12-1.06
rs3116499	2	204649276	A	G	0.9	1.3e-10	0.93-0.87
rs62184035	2	204661674	A	G	0.9	8.4e-09	0.93-0.87
rs231746	2	204690355	G	C	0.9	2.4e-13	0.93-0.88
rs6745050	2	204691538	T	C	0.88	3.4e-20	0.90-0.86
rs34636506	2	204692216	A	G	1.14	3.6e-20	1.17-1.11
rs231738	2	204693137	G	C	1.11	6e-15	1.14-1.08
rs1968351	2	204693736	A	C	1.14	3.5e-20	1.17-1.10
rs231735	2	204693876	T	G	1.11	6.2e-15	1.14-1.08
rs6714925	2	204694235	A	T	0.9	5.8e-15	0.92-0.88
rs13030124	2	204694263	A	G	0.88	3.3e-20	0.90-0.86
rs231734	2	204694280	A	G	1.11	6e-15	1.14-1.08
rs231733	2	204694465	A	G	0.9	5.9e-15	0.92-0.88
rs3116513	2	204694611	A	G	1.09	7.6e-11	1.12-1.06
rs6715389	2	204694621	T	C	1.11	5e-15	1.14-1.08
rs3116514	2	204694784	A	G	1.11	5.5e-15	1.14-1.08
rs3115969	2	204694805	T	C	0.9	5.4e-15	0.92-0.88
rs12986861	2	204694952	A	G	0.9	5.1e-15	0.92-0.88
rs863603	2	204694974	T	C	1.11	5.3e-15	1.14-1.08
rs10490516	2	204695788	T	C	1.11	4.7e-15	1.14-1.08
rs34050244	2	204696941	A	G	0.88	3.5e-20	0.90-0.86
rs34461055	2	204697133	A	G	1.14	2.9e-20	1.17-1.11
rs2882970	2	204698111	T	C	1.11	7.2e-10	1.14-1.07
rs231789	2	204699952	T	C	1.11	4.8e-15	1.14-1.08
rs231790	2	204700574	T	G	1.11	4.7e-15	1.14-1.08
rs12990970	2	204700689	T	C	0.88	2.3e-20	0.90-0.86
rs12992492	2	204701554	A	G	0.92	3.7e-10	0.94-0.89
rs231791	2	204701865	A	C	1.11	3.9e-15	1.14-1.08
rs4675372	2	204702013	T	G	1.09	3.5e-10	1.12-1.06
rs231792	2	204702249	A	G	0.9	4.7e-15	0.92-0.88
rs1863800	2	204702660	T	C	0.88	3.3e-20	0.90-0.86
rs231796	2	204704702	A	G	1.11	6.5e-15	1.14-1.08
rs2162606	2	204705157	G	C	1.11	6.2e-15	1.14-1.08
rs231797	2	204706107	A	G	0.9	6.1e-15	0.92-0.88
rs13033315	2	204706865	A	T	1.14	3.5e-20	1.17-1.11
rs11571303	2	204707138	A	G	0.9	5.3e-15	0.92-0.88
rs231799	2	204707417	T	C	1.11	6.1e-15	1.14-1.08
rs231800	2	204707585	G	C	0.9	6.1e-15	0.92-0.88
rs231804	2	204708646	T	C	1.14	3.7e-20	1.17-1.11
rs10932023	2	204708720	A	C	0.92	3.9e-10	0.94-0.89
rs11571304	2	204708776	A	T	0.88	3.7e-20	0.90-0.86
rs231806	2	204709349	G	C	1.14	3.4e-20	1.17-1.11
rs231810	2	204712143	A	G	0.9	6.8e-15	0.92-0.88
rs231811	2	204713891	T	G	1.13	6.5e-20	1.17-1.10
rs58716662	2	204715576	T	G	0.91	4.3e-09	0.94-0.88
rs11571293	2	204717713	T	G	0.89	1.6e-16	0.92-0.87
rs11571292	2	204720139	A	G	1.08	4e-09	1.11-1.05
rs231763	2	204720895	T	G	0.92	7e-10	0.95-0.90
rs11571291	2	204721132	T	C	1.13	3.5e-18	1.16-1.10
rs1024161	2	204721752	T	C	1.09	7.2e-10	1.11-1.06
rs1024162	2	204722159	A	T	1.13	3.4e-18	1.16-1.10
rs926169	2	204722752	T	G	1.08	2.9e-09	1.11-1.05
rs231764	2	204723541	T	C	1.09	8e-10	1.11-1.06
rs1427679	2	204723750	A	G	0.92	6.4e-10	0.95-0.90
rs231770	2	204729153	T	C	1.09	8.4e-10	1.11-1.06
rs1427680	2	204729795	A	G	0.92	5.7e-10	0.95-0.90
rs736611	2	204730465	T	C	0.92	6.1e-10	0.95-0.90
rs11571315	2	204730901	T	C	1.09	5.7e-10	1.11-1.06
rs11571316	2	204731089	A	G	0.89	3.5e-18	0.91-0.86
rs231775	2	204732714	A	G	0.91	3.5e-13	0.93-0.88
rs231779	2	204734487	T	C	1.1	4.1e-13	1.13-1.07
rs3087243	2	204738919	A	G	0.87	1.7e-22	0.90-0.85
rs231723	2	204739781	A	G	0.91	1.9e-13	0.93-0.88
rs231724	2	204739823	A	G	0.9	3.6e-14	0.93-0.88
rs231725	2	204740675	A	G	1.1	1.4e-12	1.13-1.07
rs231726	2	204740866	T	C	1.1	1.5e-12	1.13-1.07
rs1427676	2	204741166	T	C	0.91	1.3e-12	0.93-0.88
rs231727	2	204741550	A	G	1.1	1.4e-12	1.13-1.07
rs11571302	2	204742934	T	G	0.88	8.8e-22	0.90-0.86
rs7565213	2	204743409	A	G	0.88	9.7e-22	0.90-0.85
rs231729	2	204743801	A	T	1.1	1.3e-12	1.13-1.07
rs11571297	2	204745003	T	C	1.14	2.9e-21	1.17-1.11
rs2882973	2	204746942	T	C	0.91	3.4e-11	0.94-0.89
rs960792	2	204749250	T	C	1.12	9.1e-18	1.15-1.09
rs1365965	2	204751870	T	C	0.91	3.6e-11	0.94-0.89
rs7600322	2	204754353	T	C	1.12	9.6e-18	1.15-1.09
rs6737395	2	204754591	A	G	1.09	4.4e-11	1.12-1.07
rs1991416	2	204755309	A	G	0.91	3.5e-11	0.94-0.89
rs6748358	2	204756905	A	C	0.89	7.3e-18	0.91-0.87
rs1427678	2	204758358	A	G	0.89	5.5e-18	0.91-0.87
rs2352546	2	204758746	A	G	0.91	3.6e-11	0.94-0.89
rs3116500	2	204759530	A	G	1.09	3.4e-10	1.12-1.06
rs10497873	2	204762327	T	G	0.9	1e-09	0.93-0.87
rs3096849	2	204762957	A	G	0.91	3.9e-11	0.94-0.89
rs3096851	2	204763882	A	C	0.91	3.6e-11	0.94-0.89
rs3096852	2	204764418	T	C	0.91	3.6e-11	0.94-0.89
rs3116523	2	204764814	T	G	1.09	3.4e-11	1.12-1.07
rs3116504	2	204769054	A	G	0.91	4.7e-11	0.94-0.89
rs11676461	2	204769396	A	G	0.9	2.2e-09	0.93-0.87
rs34037980	2	204770054	A	G	1.11	9e-10	1.15-1.07
rs3887196	2	204772166	T	C	0.9	9.9e-10	0.93-0.87
rs2162608	2	204772618	A	C	0.91	6.6e-11	0.94-0.89
rs3116518	2	204774443	A	T	0.92	1.1e-10	0.94-0.89
rs13010492	2	204776176	G	C	1.12	1.1e-16	1.15-1.09
rs17268364	2	204777818	A	G	0.89	1.1e-16	0.92-0.87
rs3116505	2	204779181	T	C	1.09	1.2e-10	1.12-1.06
rs3116521	2	204780841	G	C	1.11	1.3e-14	1.14-1.08
rs3096857	2	204781020	T	C	0.91	1.1e-10	0.94-0.89
rs62182631	2	204781918	G	C	0.9	1.1e-14	0.93-0.88
rs2352548	2	204781920	G	C	0.9	1.1e-14	0.93-0.88
rs3096859	2	204782575	T	C	0.91	1e-10	0.94-0.89
rs7596727	2	204783582	T	C	1.11	1.2e-14	1.14-1.08
rs56085247	2	204783699	T	C	0.91	1.1e-10	0.94-0.89
rs13029135	2	204784212	A	C	0.9	1.2e-14	0.93-0.88
rs3116508	2	204785385	G	C	0.9	1.1e-14	0.93-0.88
rs3116509	2	204785456	G	C	1.11	1.1e-14	1.14-1.08
rs3096860	2	204786162	T	C	0.91	1.1e-10	0.94-0.89
rs3116510	2	204786317	A	G	0.9	1.1e-14	0.93-0.88
rs10932027	2	204786474	A	G	0.9	1.1e-14	0.93-0.88
rs62182632	2	204787134	T	C	0.9	1.1e-14	0.93-0.88
rs3116511	2	204788141	A	C	0.91	1.2e-10	0.94-0.89
rs2033171	2	204788156	T	C	1.11	1.4e-14	1.14-1.08
rs3116525	2	204788795	A	G	1.09	1.1e-10	1.12-1.06
rs3096861	2	204789081	T	G	0.91	1.2e-10	0.94-0.89
rs11571307	2	204790611	T	C	1.11	1.9e-14	1.14-1.08
rs1978594	2	204791469	T	G	0.9	2.2e-14	0.93-0.88
rs1978595	2	204791529	T	C	0.9	1.6e-14	0.93-0.88
rs1896493	2	204792409	A	G	0.9	1.9e-13	0.93-0.88
rs3096863	2	204792732	G	C	0.91	1.3e-10	0.94-0.89
rs10932028	2	204793063	A	C	0.9	1.9e-13	0.93-0.88
rs11571310	2	204793298	T	C	0.9	7.3e-14	0.93-0.88
rs11571309	2	204793339	T	G	0.9	7.5e-14	0.93-0.88
rs3116526	2	204793542	T	C	0.91	1.1e-10	0.94-0.89
rs3096865	2	204794496	T	C	0.91	1.6e-10	0.94-0.89
rs2352551	2	204794757	T	C	1.11	1.4e-13	1.14-1.08
rs3096866	2	204794952	A	G	0.92	2.4e-10	0.94-0.89
rs9862613	3	16983834	A	T	0.93	4.3e-08	0.95-0.91
rs9830460	3	16984793	A	G	1.08	4e-08	1.10-1.05
rs7639882	3	16985272	T	C	1.08	2e-08	1.11-1.05
rs9841259	3	16986805	A	G	1.08	4.9e-08	1.10-1.05
rs9854760	3	16994492	G	C	1.08	2.4e-09	1.11-1.05
rs4685408	3	16996035	A	G	1.08	4.4e-09	1.11-1.05
rs13080782	3	16996623	A	G	1.08	1.7e-09	1.11-1.06
rs60027645	3	16997529	A	T	1.08	1.5e-09	1.11-1.06
rs7645335	3	16999663	A	T	0.93	4.9e-09	0.95-0.90
rs6780191	3	17000228	A	G	1.08	1.8e-09	1.11-1.06
rs4685409	3	17000910	G	C	0.92	1.9e-09	0.95-0.90
rs1441035	3	17001236	T	C	0.93	4.9e-09	0.95-0.90
rs1837697	3	17001564	T	C	0.93	4.9e-09	0.95-0.90
rs12330362	3	17005833	T	G	0.92	4.6e-09	0.95-0.90
rs9713127	3	17006401	T	G	1.08	4e-08	1.11-1.05
rs9713822	3	17006569	A	G	0.92	4.3e-08	0.95-0.90
rs13317381	3	17010093	T	G	0.93	4.5e-09	0.95-0.90
rs6781611	3	17011218	A	G	1.08	1.7e-09	1.11-1.06
rs3906814	3	17011474	G	C	1.08	1.1e-09	1.11-1.06
rs11128811	3	17012948	A	G	1.08	2.8e-08	1.11-1.05
rs1806556	3	17016719	T	C	1.08	4.8e-09	1.11-1.05
rs1806555	3	17016794	A	C	0.92	3.3e-09	0.95-0.90
rs7653027	3	17019857	T	C	1.08	1.6e-09	1.11-1.06
rs4685412	3	17021485	T	C	0.92	5.4e-09	0.95-0.90
rs4685415	3	17022305	A	G	0.92	1.1e-08	0.95-0.90
rs7629171	3	17024248	A	G	0.92	1.7e-09	0.95-0.90
rs4416363	3	17025606	A	G	0.92	1.2e-09	0.94-0.89
rs11717329	3	17026123	A	G	1.08	2e-09	1.11-1.06
rs13071645	3	17028378	T	C	0.92	2e-09	0.95-0.90
rs9881521	3	17029455	A	G	1.08	2.3e-09	1.11-1.06
rs4685418	3	17035078	A	T	1.08	2.4e-09	1.11-1.06
rs9810017	3	17035399	G	C	0.92	2.4e-09	0.95-0.90
rs6807144	3	17036875	A	T	0.92	2.4e-09	0.95-0.90
rs6805534	3	17039276	T	C	0.92	2.7e-09	0.95-0.90
rs12233492	3	17043413	T	C	0.92	3e-09	0.95-0.90
rs4461404	3	17045363	T	C	0.92	2.9e-09	0.95-0.90
rs7617779	3	17045586	A	G	0.92	1.4e-09	0.94-0.89
rs6442660	3	17046152	A	G	1.08	3.4e-09	1.11-1.05
rs5019428	3	17046866	A	G	1.09	7.2e-10	1.12-1.06
rs4452313	3	17047032	A	T	0.92	8.2e-10	0.94-0.89
rs4472039	3	17047123	T	C	0.92	7.4e-10	0.94-0.90
rs3924971	3	17048487	A	G	1.09	8.4e-10	1.12-1.06
rs7612044	3	17050993	G	C	0.92	8.4e-10	0.95-0.90
rs7653834	3	17051328	T	C	0.92	1.7e-09	0.94-0.89
rs4602367	3	17053499	A	G	0.92	8.4e-10	0.95-0.90
rs7611127	3	17056031	A	G	1.08	2.6e-09	1.11-1.06
rs4234539	3	17064125	T	C	0.92	1.3e-09	0.95-0.90
rs6776032	3	17064893	A	C	1.09	1.1e-09	1.12-1.06
rs4295151	3	17068563	T	G	0.92	1.2e-09	0.95-0.90
rs4596131	3	17068576	A	G	1.09	1.3e-09	1.12-1.06
rs6809087	3	17070582	T	C	0.92	1.3e-09	0.95-0.90
rs6797029	3	17070872	A	G	1.09	1.2e-09	1.12-1.06
rs4535211	3	17072997	A	G	0.92	1.3e-09	0.95-0.90
rs12108065	3	17074871	A	G	0.92	1.8e-09	0.94-0.89
rs12491516	3	17075768	A	C	1.09	1.4e-08	1.12-1.06
rs12497953	3	17075913	A	T	0.92	1.2e-09	0.95-0.90
rs7648912	3	17076560	G	C	1.09	1.6e-08	1.12-1.06
rs17272796	3	17077268	T	C	1.09	1.2e-09	1.12-1.06
rs4353792	3	17078640	A	G	0.92	1.2e-09	0.95-0.90
rs4685420	3	17079201	A	T	0.92	1.2e-09	0.95-0.90
rs4423750	3	17079769	T	G	0.92	1.2e-09	0.95-0.90
rs12497667	3	17080974	A	G	0.92	1.2e-09	0.95-0.90
rs7617672	3	17081116	T	C	1.09	1.2e-09	1.12-1.06
rs12487288	3	17083048	A	G	0.92	1.3e-09	0.95-0.90
rs6762816	3	17083709	A	G	1.09	1.3e-09	1.12-1.06
rs13080108	3	17084900	A	G	1.09	1.3e-09	1.12-1.06
rs11926952	3	17085754	A	G	1.09	3.2e-09	1.12-1.06
rs35319117	3	17086678	T	C	0.92	3.1e-09	0.95-0.89
rs4685421	3	17090334	A	G	0.92	3.5e-09	0.95-0.89
rs55748719	3	17091601	A	G	0.92	3.6e-09	0.95-0.89
rs13058764	3	17093538	A	G	0.92	3.8e-09	0.95-0.89
rs13059347	3	17093626	A	G	1.09	3.8e-09	1.12-1.06
rs11128815	3	17094361	T	C	1.09	3.8e-09	1.12-1.06
rs10865746	3	17094561	T	C	0.92	4.7e-09	0.95-0.90
rs9985404	3	17095401	A	G	0.92	4.9e-09	0.95-0.90
rs4561816	3	17098500	G	C	0.92	1e-08	0.95-0.90
rs7610811	3	17099309	T	C	0.92	9.4e-09	0.95-0.90
chr3:27758274	3	27758274	T	G	1.08	4.2e-08	1.12-1.05
rs12715125	3	27763427	G	C	0.91	2.4e-08	0.94-0.87
rs3806624	3	27764623	A	G	0.92	1.9e-08	0.95-0.90
rs34269949	3	27769551	A	C	0.92	2.5e-08	0.95-0.90
rs1353286	3	27772014	T	G	0.92	3.4e-08	0.95-0.90
rs9880772	3	27777779	A	G	1.08	3.9e-08	1.11-1.05
rs73081554	3	58302935	T	C	1.18	4.6e-08	1.25-1.11
rs6831973	4	10709366	T	C	0.91	2.5e-08	0.94-0.89
rs9291444	4	10713674	T	C	1.09	3.5e-08	1.13-1.06
rs4293777	4	10716939	G	C	0.92	2.9e-08	0.94-0.89
rs9685212	4	10718269	T	C	1.09	2.7e-08	1.13-1.06
rs7437047	4	10718589	A	G	1.09	2.7e-08	1.13-1.06
rs56817615	4	10718846	A	G	0.92	2.8e-08	0.94-0.89
rs6817932	4	10720549	A	G	0.92	2.8e-08	0.94-0.89
rs4269168	4	10722604	A	C	1.09	3e-08	1.13-1.06
rs10003123	4	10723258	A	G	0.92	2.6e-08	0.94-0.89
rs4293778	4	10723504	T	G	0.92	2.5e-08	0.94-0.89
rs4276275	4	10723685	T	C	1.09	2.5e-08	1.13-1.06
rs4293779	4	10723711	T	C	0.92	2.5e-08	0.94-0.89
rs13137278	4	10723874	A	G	0.92	2.6e-08	0.94-0.89
rs4295251	4	10724220	T	C	0.92	2.5e-08	0.94-0.89
rs4348087	4	10724395	A	C	0.92	2.4e-08	0.94-0.89
rs6448200	4	10724809	T	C	0.92	2.4e-08	0.94-0.89
rs6852722	4	10724893	G	C	1.09	1.7e-08	1.13-1.06
rs6829409	4	10725053	A	G	0.91	1.7e-08	0.94-0.89
rs11734769	4	10725728	T	G	0.91	1.8e-08	0.94-0.89
rs7654347	4	10725823	T	C	1.09	1.8e-08	1.13-1.06
rs7678509	4	10725935	A	G	0.91	1.8e-08	0.94-0.89
rs7678867	4	10726059	A	G	0.91	1.7e-08	0.94-0.89
rs7678879	4	10726074	A	G	0.91	1.7e-08	0.94-0.89
rs7683890	4	10726125	T	C	0.91	1.6e-08	0.94-0.89
rs7679089	4	10726218	A	G	0.91	1.6e-08	0.94-0.89
rs7655068	4	10726231	T	C	1.09	1.6e-08	1.13-1.06
rs7679275	4	10726286	A	T	0.91	1.6e-08	0.94-0.89
rs13135671	4	10726474	T	C	0.92	4.5e-08	0.94-0.89
rs13103285	4	10726520	T	C	1.09	4.2e-08	1.13-1.06
rs13142500	4	10727357	T	C	0.91	5e-09	0.94-0.88
chr4:10727528	4	10727528	A	G	1.1	2.8e-08	1.14-1.07
rs13110734	4	10727529	G	C	1.1	2.7e-08	1.14-1.07
rs4692059	4	26072751	T	C	1.08	4.6e-08	1.11-1.05
rs907496	4	26081846	A	G	0.93	1.1e-08	0.95-0.90
rs11931282	4	26085018	A	G	0.92	7.2e-09	0.94-0.89
rs10017363	4	26085368	T	C	1.09	1.9e-08	1.12-1.06
rs34185821	4	26085480	A	G	0.87	2.1e-16	0.90-0.85
rs10517086	4	26085511	A	G	1.15	1.6e-16	1.18-1.11
rs17630466	4	26086569	A	G	0.87	2e-16	0.90-0.85
rs16878091	4	26088128	A	G	1.14	1.9e-16	1.18-1.11
chr4:26088220	4	26088220	A	G	1.09	5.9e-09	1.12-1.06
rs4610320	4	26089719	T	C	0.92	9e-09	0.94-0.89
rs7441808	4	26090375	A	G	0.87	2e-16	0.90-0.85
rs932036	4	26090862	A	T	0.87	2.3e-16	0.90-0.85
rs4473645	4	26091198	A	G	0.87	2.2e-16	0.90-0.85
rs6827904	4	26094755	T	G	0.92	2.1e-08	0.95-0.89
rs35944082	4	26095314	A	G	0.87	3.4e-16	0.90-0.85
rs6448432	4	26098810	A	G	1.15	1.2e-16	1.18-1.11
rs12506688	4	26104113	T	C	1.15	2.2e-16	1.18-1.11
rs17698094	4	26106298	A	G	0.92	2e-08	0.95-0.89
rs874040	4	26108197	G	C	0.87	2e-16	0.90-0.85
rs6839155	4	26108745	T	C	0.92	2.1e-08	0.95-0.89
rs6813979	4	26108809	G	C	0.92	2.2e-08	0.95-0.89
rs6448434	4	26110113	A	G	1.15	1.1e-16	1.19-1.11
rs13120368	4	26111228	G	C	1.1	2.1e-08	1.13-1.06
chr4:26111351	4	26111351	A	C	0.88	9e-12	0.91-0.85
rs34046593	4	26111593	A	G	1.15	8.9e-17	1.19-1.11
rs1877386	4	26112549	A	G	0.91	1.4e-08	0.94-0.89
rs1877385	4	26112571	A	G	1.09	1.6e-08	1.13-1.06
rs3920213	4	26113798	A	G	0.91	1.8e-08	0.94-0.89
rs6848239	4	26114046	A	G	0.87	1.3e-16	0.90-0.84
rs34897565	4	26115747	T	C	0.87	1.3e-16	0.90-0.84
rs6822921	4	26118755	T	C	0.91	1.5e-08	0.94-0.89
rs11933540	4	26120001	T	C	0.87	8.8e-17	0.90-0.84
rs36020664	4	26120328	T	G	0.87	8.8e-17	0.90-0.84
rs36110812	4	26120478	A	G	0.87	1.2e-16	0.90-0.84
rs2048506	4	26121675	T	C	0.91	1.4e-08	0.94-0.89
rs6818531	4	26122164	A	G	0.91	1.5e-08	0.94-0.89
rs6844683	4	26122329	A	T	1.09	9.6e-09	1.13-1.06
rs6825116	4	26122858	T	G	1.15	1.5e-16	1.19-1.11
rs12500532	4	26123093	G	C	0.91	1.3e-08	0.94-0.89
rs7668577	4	26123319	A	C	0.87	1.4e-16	0.90-0.84
rs7669227	4	26123616	A	G	0.91	1.4e-08	0.94-0.89
rs7684957	4	26124842	T	C	0.91	1.4e-08	0.94-0.89
rs6448435	4	26125335	T	C	1.1	7.8e-09	1.13-1.06
rs7686190	4	26125453	T	G	0.91	8.9e-09	0.94-0.89
chr4:26125938	4	26125938	A	T	1.15	1.4e-16	1.19-1.11
rs7668094	4	26126467	T	C	1.1	7.9e-09	1.13-1.06
rs7668601	4	26126576	A	G	1.09	1.2e-08	1.13-1.06
rs7673206	4	26126838	A	G	0.87	1.4e-16	0.90-0.84
rs35844597	4	26128148	G	C	0.87	1.5e-16	0.90-0.84
rs35858516	4	26128710	A	G	1.15	1.4e-16	1.19-1.11
rs10040327	5	55435220	A	C	0.82	1.1e-12	0.87-0.78
rs6873385	5	55436851	A	T	0.84	1e-16	0.87-0.80
rs6859219	5	55438580	A	C	0.84	1.1e-16	0.87-0.80
rs10065637	5	55438851	T	C	0.84	8.2e-17	0.87-0.80
rs71624119	5	55440730	A	G	0.84	1.6e-17	0.87-0.81
rs10213692	5	55442249	T	C	1.19	1.3e-17	1.24-1.14
rs7731626	5	55444683	A	G	0.83	7.3e-24	0.86-0.80
rs28722705	5	55453942	A	T	1.21	6.1e-15	1.27-1.15
rs13186299	5	55455645	G	C	1.21	6.6e-16	1.27-1.16
rs13160933	5	55545859	T	C	0.84	2e-11	0.89-0.80
rs13328207	5	55567087	A	G	0.85	1e-10	0.89-0.81
rs28157	5	102595837	T	G	0.92	6.2e-09	0.95-0.89
rs28158	5	102595892	G	C	0.92	4e-09	0.94-0.89
rs26232	5	102596720	T	C	0.92	4.4e-09	0.94-0.89
rs26233	5	102596816	T	G	0.92	4.2e-09	0.94-0.89
rs26234	5	102597156	A	G	0.92	4.1e-09	0.94-0.89
rs39984	5	102597292	T	G	0.92	3.5e-09	0.94-0.89
rs2569018	5	102597743	A	G	1.09	3.4e-09	1.12-1.06
rs2561482	5	102597798	G	C	1.09	3.4e-09	1.12-1.06
rs434830	5	102599306	A	G	1.09	3.3e-09	1.12-1.06
rs434816	5	102599328	A	G	1.09	3.3e-09	1.12-1.06
rs376286	5	102599390	A	G	0.92	3.3e-09	0.94-0.89
rs375637	5	102599578	A	G	0.92	3.9e-09	0.94-0.89
rs434294	5	102599626	A	G	1.09	3.8e-09	1.12-1.06
rs2288789	5	102600524	A	G	0.92	1.4e-08	0.95-0.90
rs2288788	5	102600569	T	G	1.09	3e-09	1.12-1.06
rs2288787	5	102600706	A	G	1.09	3e-09	1.12-1.06
rs2288786	5	102600754	A	G	0.92	2.9e-09	0.94-0.89
rs568999	5	102601358	G	C	1.09	2.9e-09	1.12-1.06
rs411648	5	102602902	A	T	1.09	3e-09	1.12-1.06
rs2569016	5	102603132	A	G	1.09	3e-09	1.12-1.06
rs377192	5	102603554	T	C	0.92	3.1e-09	0.94-0.89
rs403214	5	102603701	A	G	1.09	3.1e-09	1.12-1.06
rs187579	5	102604933	A	C	1.09	3e-09	1.12-1.06
rs366437	5	102605601	T	C	1.09	2.9e-09	1.12-1.06
rs35803	5	102606942	A	G	1.09	2.9e-09	1.12-1.06
rs35802	5	102607585	A	T	1.09	2.6e-09	1.12-1.06
rs35801	5	102608213	T	G	0.92	2.3e-09	0.94-0.89
rs35800	5	102608681	G	C	0.92	1e-08	0.95-0.90
rs2561476	5	102608834	T	C	1.09	2.2e-09	1.12-1.06
rs2569015	5	102608847	A	G	1.09	2.2e-09	1.12-1.06
rs2561477	5	102608924	A	G	0.92	1.9e-09	0.94-0.89
rs35797	5	102614327	T	C	0.93	2.9e-08	0.95-0.90
rs386352	5	102615707	T	G	0.93	2.9e-08	0.95-0.90
rs253758	5	102615978	T	C	1.08	2.9e-08	1.11-1.05
rs253757	5	102616010	T	C	1.08	2.9e-08	1.11-1.05
rs253756	5	102620472	A	G	0.93	2.6e-08	0.95-0.90
rs2561478	5	102621804	A	G	1.08	1.7e-08	1.11-1.05
rs2561479	5	102621877	A	C	0.92	1.5e-08	0.95-0.90
rs1991797	5	102622453	T	G	0.92	6.2e-09	0.95-0.89
rs448086	5	102623581	A	G	1.09	4.7e-09	1.12-1.06
rs556560	5	102623924	A	G	1.09	5e-09	1.12-1.06
rs402962	5	102624008	A	T	0.92	4.8e-09	0.95-0.90
rs444779	5	102624161	A	G	1.08	2.7e-08	1.11-1.05
rs35804	5	102625335	A	G	1.09	4.4e-09	1.12-1.06
rs9392504	6	412802	A	G	1.08	4.1e-08	1.11-1.05
rs9378815	6	426155	G	C	0.91	5.9e-11	0.94-0.89
rs9378816	6	426198	G	C	0.91	6.6e-11	0.94-0.89
rs6930468	6	426268	A	G	0.91	5.5e-11	0.94-0.89
rs56306240	6	426346	T	C	0.92	1.3e-08	0.95-0.89
rs7748534	6	427152	T	G	1.09	3.8e-09	1.12-1.06
rs12208082	6	427455	A	G	0.92	3.8e-09	0.95-0.89
rs1567901	6	433061	A	C	1.08	2.6e-08	1.10-1.05
rs1567900	6	433109	T	C	0.93	2.7e-08	0.95-0.91
rs2048698	6	433962	T	C	1.08	4.9e-08	1.10-1.05
rs9392525	6	435677	T	C	0.93	1.2e-08	0.95-0.90
rs9503757	6	438372	A	G	0.92	6.1e-10	0.94-0.89
rs6939620	6	439183	A	T	1.09	7.6e-10	1.12-1.06
rs4443541	6	440830	A	G	1.09	4.3e-10	1.12-1.06
rs7773690	6	442924	T	G	1.09	3.4e-10	1.12-1.06
rs9405675	6	444600	A	G	1.09	1.3e-09	1.12-1.06
rs7740707	6	446540	A	C	0.92	7.5e-10	0.94-0.89
chr6:24847885	6	24847885	T	C	0.65	3.8e-08	0.76-0.56
chr6:24851452	6	24851452	T	C	0.65	3.1e-08	0.76-0.56
chr6:24855316	6	24855316	T	C	1.57	1.1e-08	1.83-1.34
chr6:24976679	6	24976679	G	C	0.65	1.1e-08	0.75-0.56
chr6:24984551	6	24984551	G	C	1.55	1e-08	1.80-1.33
chr6:25462110	6	25462110	T	C	0.67	1.3e-10	0.76-0.60
chr6:25464252	6	25464252	A	G	0.66	3.8e-11	0.75-0.59
chr6:25486099	6	25486099	T	G	1.52	2.1e-11	1.72-1.34
chr6:25489276	6	25489276	T	C	0.66	2.1e-11	0.74-0.58
chr6:25496970	6	25496970	T	G	0.66	2e-11	0.74-0.58
chr6:25505164	6	25505164	G	C	1.52	1.4e-11	1.72-1.35
chr6:25531002	6	25531002	A	C	0.66	1.7e-11	0.74-0.58
chr6:25532010	6	25532010	T	C	1.52	1.8e-11	1.72-1.34
chr6:25550956	6	25550956	A	G	1.52	1.8e-11	1.72-1.34
chr6:25570041	6	25570041	T	G	0.66	1.7e-11	0.74-0.58
chr6:25572666	6	25572666	T	C	1.52	1.7e-11	1.72-1.35
chr6:25575880	6	25575880	T	C	0.66	1.6e-11	0.74-0.58
chr6:25597401	6	25597401	A	G	1.51	2.7e-11	1.71-1.34
chr6:25625622	6	25625622	T	C	0.66	4e-11	0.75-0.59
rs57075629	6	25634367	T	C	0.74	2.5e-08	0.82-0.66
rs55883228	6	25654228	A	T	0.74	2.7e-08	0.82-0.66
rs6900548	6	25678911	A	T	1.43	5.6e-10	1.60-1.28
chr6:25684735	6	25684735	A	G	0.68	1.8e-10	0.76-0.60
chr6:25684936	6	25684936	A	G	0.69	5.3e-10	0.77-0.61
chr6:25687987	6	25687987	A	T	0.68	2.3e-10	0.77-0.60
chr6:25692151	6	25692151	A	C	0.69	4.7e-10	0.77-0.61
rs58464496	6	25693493	T	C	0.68	2.1e-10	0.77-0.60
rs61312043	6	25703494	T	C	0.68	1.7e-10	0.76-0.60
chr6:25709161	6	25709161	T	C	0.68	1.6e-10	0.76-0.60
chr6:25709935	6	25709935	T	C	0.69	4e-10	0.77-0.61
chr6:25710191	6	25710191	T	G	0.69	4e-10	0.77-0.61
chr6:25710456	6	25710456	G	C	0.69	4e-10	0.77-0.61
chr6:25711311	6	25711311	A	G	0.68	1.5e-08	0.78-0.60
chr6:25714075	6	25714075	T	C	1.47	1.9e-10	1.66-1.31
chr6:25714086	6	25714086	A	T	1.46	2e-08	1.67-1.28
chr6:25718219	6	25718219	T	C	1.46	4e-10	1.64-1.30
rs16890967	6	25718273	A	G	1.46	4e-10	1.64-1.30
chr6:25719371	6	25719371	A	G	0.68	1.8e-10	0.76-0.60
rs4712958	6	25719819	G	C	1.32	5.3e-09	1.45-1.20
chr6:25720424	6	25720424	T	C	1.47	1.8e-10	1.66-1.31
rs4481423	6	25720761	T	C	0.76	2.5e-09	0.83-0.69
chr6:25721477	6	25721477	A	T	0.68	3.6e-10	0.77-0.61
rs17341475	6	25722306	T	C	1.46	3.6e-10	1.64-1.30
chr6:25722838	6	25722838	A	G	0.68	3.6e-10	0.77-0.61
chr6:25723034	6	25723034	T	C	1.46	3.6e-10	1.64-1.30
chr6:25726274	6	25726274	A	G	0.68	1.7e-10	0.76-0.60
chr6:25733083	6	25733083	A	G	0.68	2e-10	0.77-0.61
rs7738984	6	25742529	A	T	1.41	3.7e-09	1.57-1.26
chr6:25743976	6	25743976	T	G	0.68	8.3e-09	0.78-0.60
rs2154220	6	25746550	A	G	0.71	3.8e-09	0.80-0.64
rs9348693	6	25751232	G	C	1.3	4.2e-09	1.41-1.19
chr6:25751868	6	25751868	A	G	0.68	2e-10	0.77-0.61
chr6:25753207	6	25753207	A	C	1.41	3.8e-09	1.57-1.25
chr6:25753589	6	25753589	A	G	1.47	2e-10	1.65-1.30
rs2154221	6	25754500	G	C	0.71	3.5e-09	0.80-0.63
chr6:25756872	6	25756872	T	C	0.68	7.9e-09	0.77-0.60
chr6:25759553	6	25759553	T	G	0.69	3.5e-10	0.77-0.61
chr6:25761219	6	25761219	T	C	0.68	5.4e-09	0.77-0.59
chr6:25764130	6	25764130	A	G	1.35	8.3e-09	1.49-1.22
rs59340721	6	25773998	T	C	0.75	3.6e-08	0.83-0.68
chr6:25790314	6	25790314	T	C	1.46	3.1e-10	1.64-1.30
chr6:25794922	6	25794922	A	C	0.69	3.1e-10	0.77-0.61
rs1165198	6	25809887	A	G	0.75	1.2e-08	0.83-0.68
chr6:25810992	6	25810992	A	G	0.69	3.1e-10	0.77-0.61
rs1165197	6	25812119	A	G	1.34	1.2e-08	1.48-1.21
rs1165194	6	25815179	A	T	1.34	1.3e-08	1.48-1.21
rs34892514	6	25819369	T	C	1.46	3.2e-10	1.64-1.30
rs2762352	6	25823379	T	C	0.75	1.4e-08	0.83-0.68
rs6904823	6	25843669	A	G	1.45	4e-10	1.63-1.29
rs6928027	6	25847089	T	C	0.73	1.6e-08	0.81-0.65
chr6:25847652	6	25847652	A	G	1.37	2.1e-08	1.53-1.23
rs34902660	6	25851102	A	C	0.69	3.7e-10	0.77-0.61
chr6:25852839	6	25852839	T	C	1.46	3.6e-10	1.64-1.30
chr6:25853717	6	25853717	T	C	0.69	3.6e-10	0.77-0.61
chr6:25855924	6	25855924	T	C	1.46	3.9e-10	1.64-1.29
chr6:25858680	6	25858680	T	C	0.69	4.3e-10	0.77-0.61
chr6:25861166	6	25861166	T	C	0.73	2.4e-08	0.82-0.66
chr6:25863176	6	25863176	A	T	1.37	2.4e-08	1.52-1.22
chr6:25866957	6	25866957	T	C	1.37	2.5e-08	1.52-1.22
chr6:25866985	6	25866985	A	G	1.45	4.3e-10	1.64-1.29
chr6:25873892	6	25873892	A	T	1.37	1.4e-08	1.53-1.23
chr6:25876566	6	25876566	T	C	0.73	2.4e-08	0.82-0.66
chr6:25878174	6	25878174	A	G	0.7	3e-09	0.79-0.62
chr6:25879137	6	25879137	T	C	1.45	5e-10	1.63-1.29
rs6909034	6	25880914	T	C	0.72	1e-08	0.81-0.65
chr6:25885419	6	25885419	T	G	1.45	5e-10	1.63-1.29
chr6:25890705	6	25890705	T	G	1.39	9.7e-09	1.55-1.24
chr6:25904885	6	25904885	T	C	0.69	3.2e-10	0.77-0.61
chr6:25905965	6	25905965	A	G	0.69	3.3e-10	0.77-0.61
chr6:25906172	6	25906172	A	G	0.69	3.3e-10	0.77-0.61
chr6:25908563	6	25908563	A	G	0.69	3.3e-10	0.77-0.61
chr6:25909476	6	25909476	T	C	1.46	3.3e-10	1.64-1.30
chr6:25924873	6	25924873	T	C	0.69	4.1e-10	0.77-0.61
chr6:25928251	6	25928251	T	C	0.69	4.1e-10	0.77-0.61
chr6:25928593	6	25928593	T	G	1.46	4.1e-10	1.64-1.29
chr6:25930736	6	25930736	A	T	0.69	4.1e-10	0.77-0.61
chr6:25931018	6	25931018	G	C	1.46	4.1e-10	1.64-1.29
chr6:25931347	6	25931347	A	G	1.46	4.1e-10	1.64-1.29
chr6:25931350	6	25931350	T	C	1.46	4.1e-10	1.64-1.29
chr6:25932306	6	25932306	A	C	1.46	4.1e-10	1.64-1.29
chr6:25935406	6	25935406	A	G	0.69	4.2e-10	0.77-0.61
chr6:25935504	6	25935504	A	G	0.69	4.2e-10	0.77-0.61
chr6:25940405	6	25940405	A	C	0.69	4.6e-10	0.77-0.61
rs60658631	6	25942700	T	C	1.45	4.5e-10	1.64-1.29
chr6:25949343	6	25949343	T	C	0.69	4.7e-10	0.77-0.61
chr6:25954229	6	25954229	G	C	0.69	4.9e-10	0.77-0.61
chr6:25955627	6	25955627	A	G	0.69	4.9e-10	0.77-0.61
chr6:25957417	6	25957417	G	C	1.45	4.9e-10	1.63-1.29
chr6:25959601	6	25959601	T	C	0.69	4.8e-10	0.77-0.61
chr6:25960536	6	25960536	A	G	0.69	4.8e-10	0.77-0.61
chr6:25960955	6	25960955	A	G	0.69	4.8e-10	0.77-0.61
chr6:25970266	6	25970266	T	C	0.69	3.7e-10	0.77-0.61
chr6:25975267	6	25975267	T	C	1.45	3.9e-10	1.64-1.29
chr6:25976691	6	25976691	A	C	1.45	3.8e-10	1.64-1.29
chr6:25978264	6	25978264	T	C	0.69	3.7e-10	0.77-0.61
rs58845848	6	25979143	A	G	0.69	3.8e-10	0.77-0.61
chr6:25982149	6	25982149	T	C	1.45	3.8e-10	1.64-1.29
chr6:25987918	6	25987918	T	C	0.69	3.8e-10	0.77-0.61
chr6:25988208	6	25988208	T	C	1.45	3.8e-10	1.64-1.29
chr6:25988871	6	25988871	A	G	0.69	4.1e-10	0.77-0.61
chr6:25989279	6	25989279	T	C	0.69	4.1e-10	0.77-0.61
chr6:25990508	6	25990508	A	G	1.45	4e-10	1.63-1.29
chr6:25996818	6	25996818	T	G	0.69	4e-10	0.77-0.61
chr6:25998577	6	25998577	T	G	1.45	4.1e-10	1.63-1.29
chr6:26008444	6	26008444	T	C	0.69	4.3e-10	0.77-0.61
chr6:26018760	6	26018760	T	C	1.45	4e-10	1.63-1.29
chr6:26019557	6	26019557	T	C	1.45	3.9e-10	1.63-1.29
rs61735217	6	26021026	A	G	0.69	3.6e-10	0.77-0.61
chr6:26022690	6	26022690	A	T	1.46	3e-10	1.64-1.30
chr6:26027017	6	26027017	T	C	1.46	3e-10	1.64-1.30
chr6:26029750	6	26029750	T	G	0.69	2.9e-10	0.77-0.61
chr6:26029765	6	26029765	T	G	0.69	2.9e-10	0.77-0.61
chr6:26030329	6	26030329	T	C	0.69	2.9e-10	0.77-0.61
rs59324656	6	26032311	G	C	0.69	2.7e-10	0.77-0.61
chr6:26033138	6	26033138	A	G	0.69	2.7e-10	0.77-0.61
chr6:26038047	6	26038047	T	C	1.46	2.7e-10	1.64-1.30
chr6:26038683	6	26038683	A	G	1.46	2.7e-10	1.64-1.30
chr6:26051809	6	26051809	T	C	1.46	2.7e-10	1.64-1.30
rs12111009	6	26056286	G	C	0.69	2.8e-10	0.77-0.61
chr6:26066206	6	26066206	A	G	0.69	3.2e-10	0.77-0.61
chr6:26069883	6	26069883	T	C	0.69	3.2e-10	0.77-0.61
chr6:26078585	6	26078585	A	G	0.69	3.4e-10	0.77-0.61
chr6:26078703	6	26078703	T	G	1.45	3.4e-10	1.64-1.29
rs62625330	6	26090184	A	G	1.35	1.6e-08	1.50-1.22
rs34555420	6	26090270	G	C	1.21	3.5e-11	1.29-1.15
rs62625350	6	26094750	A	T	1.48	2.5e-11	1.67-1.32
chr6:26110025	6	26110025	T	C	0.74	1.3e-08	0.82-0.67
chr6:26120500	6	26120500	A	G	0.69	3.2e-10	0.77-0.61
rs28365923	6	26123649	A	G	0.7	4.6e-10	0.79-0.63
chr6:26124946	6	26124946	A	T	0.67	2.1e-11	0.76-0.60
chr6:26128391	6	26128391	A	G	1.49	2e-11	1.67-1.32
rs57396536	6	26131506	T	C	0.67	2e-11	0.76-0.60
chr6:26131810	6	26131810	A	T	1.47	3.7e-13	1.64-1.33
chr6:26136408	6	26136408	T	C	0.67	2e-11	0.75-0.60
rs3819407	6	26136588	A	C	0.67	2e-11	0.75-0.60
chr6:26143498	6	26143498	G	C	1.46	3.1e-10	1.64-1.30
chr6:26143872	6	26143872	T	C	0.7	5.4e-12	0.77-0.63
chr6:26149789	6	26149789	A	G	1.45	4.4e-10	1.63-1.29
chr6:26150423	6	26150423	T	C	0.69	4.4e-10	0.78-0.61
chr6:26151776	6	26151776	G	C	0.69	4.4e-10	0.78-0.61
chr6:26153780	6	26153780	A	G	0.72	3.6e-11	0.79-0.65
chr6:26154809	6	26154809	A	G	0.69	4e-10	0.77-0.61
rs2298091	6	26158439	A	C	0.69	3.8e-10	0.77-0.61
chr6:26158973	6	26158973	T	C	1.45	3e-11	1.62-1.30
chr6:26159650	6	26159650	G	C	1.45	3.8e-10	1.63-1.29
chr6:26160134	6	26160134	T	C	1.45	3.8e-10	1.63-1.29
chr6:26160167	6	26160167	T	C	1.45	3.8e-10	1.63-1.29
chr6:26160820	6	26160820	A	G	0.69	2.8e-11	0.77-0.62
chr6:26161416	6	26161416	A	C	1.45	3.8e-10	1.63-1.29
chr6:26161871	6	26161871	A	G	0.69	3.8e-10	0.77-0.61
chr6:26162623	6	26162623	A	G	1.45	3.7e-10	1.63-1.29
rs9467684	6	26162679	A	G	0.78	5.8e-09	0.84-0.71
chr6:26162730	6	26162730	A	G	1.45	3.7e-10	1.63-1.29
chr6:26164095	6	26164095	A	C	0.69	3.7e-10	0.77-0.61
chr6:26164298	6	26164298	T	G	0.69	3.7e-10	0.77-0.61
chr6:26164363	6	26164363	A	G	0.69	2.3e-11	0.77-0.62
chr6:26165269	6	26165269	T	G	0.69	3.7e-10	0.77-0.61
chr6:26165320	6	26165320	A	G	1.45	3.7e-10	1.63-1.29
chr6:26166276	6	26166276	T	C	1.45	3.7e-10	1.63-1.29
chr6:26166303	6	26166303	A	C	1.45	3.7e-10	1.63-1.29
chr6:26166603	6	26166603	T	C	1.46	2.1e-11	1.63-1.31
chr6:26166687	6	26166687	A	G	0.69	2.1e-11	0.77-0.61
chr6:26166722	6	26166722	A	C	1.45	3.7e-10	1.63-1.29
chr6:26166912	6	26166912	A	G	1.46	2.1e-11	1.63-1.31
chr6:26167398	6	26167398	G	C	1.45	3.7e-10	1.63-1.29
chr6:26169871	6	26169871	T	G	1.45	3.7e-10	1.63-1.29
chr6:26170917	6	26170917	A	G	0.69	3.7e-10	0.77-0.61
chr6:26172548	6	26172548	T	C	1.46	2e-11	1.63-1.31
chr6:26174101	6	26174101	G	C	0.69	2e-11	0.77-0.61
chr6:26174357	6	26174357	A	G	1.45	3.8e-10	1.63-1.29
chr6:26174398	6	26174398	A	G	0.69	3.8e-10	0.77-0.61
chr6:26174557	6	26174557	A	C	0.69	3.8e-10	0.77-0.61
chr6:26175277	6	26175277	A	G	0.69	3.8e-10	0.77-0.61
chr6:26176418	6	26176418	G	C	0.69	4e-10	0.78-0.61
chr6:26176467	6	26176467	A	G	0.69	4e-10	0.78-0.61
chr6:26176533	6	26176533	A	G	0.69	4e-10	0.78-0.61
chr6:26177502	6	26177502	T	C	1.45	5e-10	1.63-1.29
chr6:26177826	6	26177826	A	G	0.69	5e-10	0.78-0.62
chr6:26178017	6	26178017	T	G	1.44	8.5e-10	1.62-1.28
chr6:26179256	6	26179256	T	C	0.64	6.6e-09	0.74-0.55
chr6:26179301	6	26179301	T	C	0.64	6.9e-09	0.74-0.55
chr6:26180426	6	26180426	A	T	1.57	7e-09	1.83-1.35
chr6:26183177	6	26183177	A	T	1.44	9.8e-10	1.61-1.28
chr6:26183765	6	26183765	T	C	1.44	9.8e-10	1.61-1.28
chr6:26184483	6	26184483	G	C	0.7	1e-09	0.78-0.62
chr6:26184879	6	26184879	T	C	1.38	1.2e-10	1.52-1.25
chr6:26188608	6	26188608	G	C	1.44	1e-09	1.61-1.28
chr6:26191653	6	26191653	T	C	0.7	1e-09	0.78-0.62
chr6:26193595	6	26193595	T	C	0.7	1.1e-09	0.78-0.62
chr6:26194962	6	26194962	A	G	1.44	1.1e-09	1.61-1.28
chr6:26194994	6	26194994	A	G	1.44	1.1e-09	1.61-1.28
chr6:26199442	6	26199442	T	C	0.7	1.1e-09	0.78-0.62
chr6:26201533	6	26201533	T	G	1.43	1.1e-09	1.61-1.28
chr6:26204685	6	26204685	A	C	0.7	1.1e-09	0.78-0.62
rs41266809	6	26205209	A	T	1.4	2.4e-11	1.55-1.27
chr6:26206563	6	26206563	T	G	1.43	1.1e-09	1.61-1.28
chr6:26206738	6	26206738	A	T	0.7	1.1e-09	0.78-0.62
rs73393463	6	26207454	T	C	1.28	1e-08	1.40-1.18
chr6:26208621	6	26208621	T	C	0.7	1.3e-09	0.78-0.62
chr6:26210850	6	26210850	T	G	0.7	1.3e-09	0.78-0.62
chr6:26212729	6	26212729	A	C	1.43	1.3e-09	1.61-1.28
chr6:26213016	6	26213016	A	G	0.7	1.3e-09	0.78-0.62
chr6:26216004	6	26216004	A	G	0.7	1.3e-09	0.78-0.62
chr6:26216105	6	26216105	A	G	0.7	1.3e-09	0.78-0.62
chr6:26216761	6	26216761	A	G	0.7	1.3e-09	0.78-0.62
chr6:26219075	6	26219075	A	C	1.43	1.2e-09	1.61-1.28
chr6:26221437	6	26221437	T	C	1.43	1.1e-09	1.61-1.28
chr6:26226219	6	26226219	T	C	1.44	1e-09	1.61-1.28
chr6:26229318	6	26229318	A	C	0.7	1e-09	0.78-0.62
chr6:26231121	6	26231121	T	G	1.44	1.1e-09	1.61-1.28
chr6:26231592	6	26231592	A	G	0.7	1.1e-09	0.78-0.62
chr6:26231656	6	26231656	A	C	1.44	1.1e-09	1.61-1.28
chr6:26232669	6	26232669	A	C	1.44	9.9e-10	1.61-1.28
chr6:26233906	6	26233906	T	C	0.7	9.9e-10	0.78-0.62
chr6:26234040	6	26234040	A	G	1.44	9.9e-10	1.61-1.28
chr6:26234598	6	26234598	T	C	0.7	9.9e-10	0.78-0.62
chr6:26235205	6	26235205	T	C	0.7	9.9e-10	0.78-0.62
chr6:26236268	6	26236268	T	C	1.44	9.9e-10	1.61-1.28
chr6:26237678	6	26237678	T	C	1.44	9.4e-10	1.62-1.28
chr6:26237779	6	26237779	T	C	0.7	9e-10	0.78-0.62
chr6:26239299	6	26239299	A	G	1.44	9e-10	1.62-1.28
chr6:26240749	6	26240749	A	G	0.69	8.5e-10	0.78-0.62
chr6:26241997	6	26241997	A	G	1.44	8.5e-10	1.62-1.28
chr6:26251745	6	26251745	T	G	1.44	8.7e-10	1.62-1.28
chr6:26252894	6	26252894	A	G	0.69	8.7e-10	0.78-0.62
chr6:26254092	6	26254092	A	G	0.69	8.9e-10	0.78-0.62
chr6:26258611	6	26258611	T	C	1.45	6.6e-11	1.62-1.30
chr6:26259241	6	26259241	G	C	0.7	9.1e-10	0.78-0.62
chr6:26261183	6	26261183	T	C	1.44	9.6e-10	1.61-1.28
chr6:26261708	6	26261708	A	G	1.44	1e-09	1.61-1.28
chr6:26262418	6	26262418	T	C	0.7	1.1e-09	0.78-0.62
chr6:26264671	6	26264671	A	G	1.44	2.7e-12	1.59-1.30
chr6:26274982	6	26274982	T	C	1.44	2.6e-12	1.59-1.30
chr6:26277864	6	26277864	T	C	1.43	1.2e-09	1.61-1.28
chr6:26283302	6	26283302	A	T	1.43	1.2e-09	1.61-1.28
chr6:26285413	6	26285413	A	G	0.7	1.2e-09	0.78-0.62
chr6:26290194	6	26290194	T	C	1.43	1.2e-09	1.61-1.28
chr6:26292452	6	26292452	T	C	0.7	1.4e-09	0.78-0.62
chr6:26322610	6	26322610	G	C	1.43	1.2e-09	1.60-1.27
chr6:26326577	6	26326577	T	G	0.7	1.6e-09	0.79-0.63
rs2006196	6	26358143	T	C	0.76	9.2e-09	0.83-0.69
chr6:26377069	6	26377069	T	C	1.46	1.6e-09	1.65-1.29
rs3757147	6	26381182	T	C	0.69	2.1e-10	0.77-0.61
rs9461247	6	26381917	T	C	1.3	2.2e-08	1.42-1.18
rs3885849	6	26384628	A	G	0.77	4.3e-08	0.85-0.71
rs3846841	6	26387160	G	C	0.77	2.3e-08	0.85-0.71
rs7356980	6	26396398	A	C	0.78	2.6e-08	0.85-0.71
rs7356982	6	26396500	A	G	1.11	1.8e-08	1.15-1.07
chr6:26396857	6	26396857	A	G	1.5	6.1e-10	1.71-1.32
rs16891666	6	26397855	T	C	0.77	4.2e-08	0.85-0.71
rs59121933	6	26397903	T	C	0.78	2.5e-08	0.85-0.71
rs6901118	6	26399586	T	C	0.83	2e-09	0.88-0.79
rs9467753	6	26399606	A	G	0.78	2.5e-08	0.85-0.71
rs72500814	6	26399758	T	G	0.78	2.5e-08	0.85-0.71
rs4712988	6	26399796	A	T	1.29	2.5e-08	1.41-1.18
rs11966630	6	26399893	T	G	0.78	2.5e-08	0.85-0.71
rs9467755	6	26400550	A	G	1.29	2.5e-08	1.41-1.18
rs3857549	6	26406053	T	C	0.83	4.1e-10	0.88-0.78
chr6:26406396	6	26406396	T	C	0.78	2.8e-08	0.85-0.71
rs41266841	6	26410011	G	C	1.51	4.6e-10	1.72-1.33
rs6456720	6	26414417	A	T	1.28	3.6e-08	1.40-1.17
rs58380352	6	26419446	T	C	0.78	3.4e-08	0.85-0.71
chr6:26430174	6	26430174	T	C	0.68	1.6e-10	0.77-0.61
rs9467757	6	26435585	T	C	0.78	2.9e-08	0.85-0.71
rs9461252	6	26437453	T	C	0.78	2.9e-08	0.85-0.71
chr6:26440820	6	26440820	G	C	1.51	1e-10	1.71-1.33
chr6:26441043	6	26441043	T	C	1.28	3.4e-08	1.40-1.17
chr6:26443614	6	26443614	T	G	1.28	2.7e-08	1.40-1.18
rs2281027	6	26446705	A	G	1.28	2.8e-08	1.40-1.18
rs17539358	6	26450771	T	C	1.47	1.1e-09	1.67-1.30
rs6935678	6	26451888	T	C	1.29	2.4e-09	1.41-1.19
rs60900866	6	26455425	A	G	1.34	2.2e-08	1.48-1.21
rs7750281	6	26459015	G	C	1.34	2.3e-08	1.48-1.21
rs9467760	6	26464637	T	C	0.75	2.2e-08	0.83-0.67
rs9461253	6	26466818	T	G	1.51	1.2e-10	1.71-1.33
rs9467761	6	26467325	T	C	1.31	6.9e-09	1.44-1.20
rs9467762	6	26467700	T	C	0.75	2.3e-08	0.83-0.68
rs4422619	6	26467759	T	C	0.76	7e-09	0.84-0.70
rs3734541	6	26468319	T	C	0.76	7e-09	0.84-0.70
[truncated: 24,287 more rows]
