# Supplementary material for: Genetic architecture study of rheumatoid arthritis and juvenile idiopathic arthritis
Source: PeerJ. 2020 Jan 15;8:e8234. doi: 10.7717/peerj.8234 (PMC6969553; doi:10.7717/peerj.8234)
Supplement: Table S4 — Novel loci are highlighted in bold. [file peerj-08-8234-s004.xls]

## Sheet: Table S4
Supplementary Table 4 Genes reaching genome-wide significance threshold of P-value < 2x10-6 in RA study. Novel loci are highlighted in bold.
Gene	Chr	Start	End	No.SNPs	SNP_start	SNP_end	Chisq(Obs)	Pvalue	TopSNP.Pvalue	TopSNP
LOC115110	1	2481358	2484284	49	rs7543665	rs10910111	640.389	2.6767e-09	1.2e-13	rs876938
LOC100133445	1	2487207	2488450	47	rs3791181	rs4379628	620.673	3.60637e-09	1.2e-13	rs876938
TNFRSF14	1	2487804	2495267	49	rs3791182	rs4474198	667.145	9.70431e-10	1.2e-13	rs876938
FAM213B	1	2517898	2522908	37	rs2477678	rs12744876	818.13	6.92989e-13	1.2e-13	rs876938
MMEL1	1	2522080	2564481	37	rs2147905	rs12744876	818.022	6.95467e-13	1.2e-13	rs876938
TTC34	1	2572806	2706230	56	rs10910098	rs59048447	686.8	1.03009e-08	5.9e-13	rs10910098
MIR3675_dup_2	1	17185443	17185516	67	rs2076606	rs10788650	634.896	2.43354e-07	3e-07	rs2647166
CROCC	1	17248444	17299474	132	rs6684770	rs12035906	1457.15	9.54245e-10	1.9e-09	rs761426
MFAP2	1	17300998	17308081	94	rs6586497	rs2454158	1023.96	8.7854e-10	1.9e-09	rs761426
ATP13A2	1	17312452	17338423	104	rs12129188	rs2977247	898.687	5.34641e-09	1.9e-09	rs761426
PADI1	1	17531620	17572501	135	rs2293920	rs730153	1613.55	2.84674e-14	2.2e-18	rs2301888
PADI3	1	17575592	17610727	107	rs1924552	rs10788672	1175.54	5.28469e-13	2.2e-18	rs2301888
SNIP1	1	38000049	38019945	62	rs11264091	rs28580415	579.178	2.3738e-08	3.6e-12	rs28411352
DNALI1	1	38022519	38032458	48	rs631457	rs12732747	532.847	5.12751e-08	3.6e-12	rs28411352
GNL2	1	38032412	38061586	55	rs569381	rs11488569	623.709	1.43497e-08	3.6e-12	rs28411352
RSPO1	1	38076950	38100595	44	rs664939	rs4653336	581.907	6.0888e-11	3.6e-12	rs28411352
C1orf109	1	38147241	38156192	51	rs61778084	rs28450036	463.41	7.04069e-07	1.1e-10	rs4281294
LOC100996251	1	113554308	113615724	105	rs12132547	rs12754133	499.236	1.37581e-06	6.7e-12	rs12086096
LRIG2	1	113615830	113667342	95	rs1007248	rs12032137	696.982	7.16234e-11	2.6e-28	rs12128454
LOC643441	1	113739403	113748875	47	rs12030192	rs12739961	685.484	1.00372e-12	2.6e-28	rs12128454
MAGI3	1	113933474	114228545	123	rs35390985	rs17032011	7729.24	6.73689e-63	1e-149	rs2476601
PHTF1	1	114239823	114301777	71	rs1217403	rs4839348	2986.5	7.40575e-43	1.7e-38	rs1217416
RSBN1	1	114304453	114355070	68	rs41283518	rs17032183	1363.32	2.08491e-19	2.8e-35	rs3811019
PTPN22	1	114356432	114414375	119	rs17852555	rs2629811	1170.03	9.00374e-11	1.1e-22	rs17032085
SSR2	1	155978838	155990758	40	rs17676026	rs4971154	350.674	1.35662e-06	2.1e-08	rs2317230
CRP	1	159682078	159684379	51	rs58840032	rs12746613	496.837	6.9974e-08	2.3e-07	rs12402741
DUSP23	1	159750758	159752333	68	rs9427386	rs56199187	540.883	1.11722e-07	3.5e-07	rs4657041
FCRL6	1	159770300	159786047	59	rs6427594	rs61801824	377.699	1.5672e-06	3.5e-07	rs4657041
PRRC2C	1	171454665	171562650	109	rs55960552	rs10753071	734.639	4.69973e-10	4.5e-10	rs4382762
MYOC	1	171604556	171621773	81	rs10912588	rs4310474	584.855	2.89754e-09	3.1e-10	rs2105325
PAPOLG	2	60983364	61029221	51	rs842625	rs35852308	428.225	6.22616e-08	2.6e-13	rs34695944
ACTR2	2	65454828	65498390	75	rs11896833	rs17535617	976.361	1.91733e-11	1.2e-14	rs1858036
EIF5B	2	99953833	100016728	55	rs10167214	rs60697219	589.834	2.74505e-08	8.6e-11	rs7582731
REV1	2	100016937	100106480	58	rs17436983	rs7593261	1104.02	1.26519e-13	3.3e-14	rs11123811
INPP1	2	191208195	191236391	57	rs4130844	rs1860850	380.907	5.21908e-07	6.7e-07	rs6733720
ABI2	2	204192961	204296896	86	rs4675345	rs6732274	739.588	5.55983e-09	6.4e-12	rs1980422
RAPH1	2	204298404	204400058	95	rs16840012	rs231727	1473.4	2.95055e-15	1.7e-22	rs3087243
MIR3714	3	16974687	16974752	37	rs2881771	rs4290789	459.832	1.20013e-08	7.4e-10	rs4472039
SLC34A2	4	25657434	25680368	105	rs6852146	rs36110812	683.76	2.80518e-07	8.8e-17	rs11933540
CETN4P	4	123651343	123653613	34	rs62322698	rs62322755	275.184	1.71996e-07	3.7e-06	rs62322723
BBS12	4	123653856	123666098	36	rs62322698	rs4833251	278.518	3.41561e-07	3.7e-06	rs62322723
ANKRD55	5	55395506	55529186	167	rs7736703	rs152352	1066.46	2.42021e-09	7.3e-24	rs7731626
C5orf30	5	102594441	102614361	39	rs26822	rs6886092	519.792	2.72588e-07	1.9e-09	rs2561477
JADE2	5	133861339	133918920	89	rs186628	rs10515464	514.564	6.3118e-07	1.9e-07	rs12652317
ZBED8	5	159820154	159827060	97	rs11135101	rs870635	513.715	5.86805e-07	3.6e-06	rs6879067
SLU7	5	159828647	159846168	96	rs17057781	rs12659539	493.806	1.39651e-06	3.6e-06	rs6879067
DUSP22	6	292056	351355	102	rs17751972	rs2316794	950.435	1.32536e-07	6.6e-11	rs9378816
IRF4	6	391738	411443	144	rs34318727	rs2493013	986.496	2.24423e-07	6.6e-11	rs9378816
BTN3A2	6	26365386	26378548	49	rs2022448	rs34434694	382.274	1.17299e-06	9.3e-08	rs9379845
BTN2A2	6	26383323	26395100	50	rs56119218	rs61625476	419.788	5.58619e-07	9.3e-08	rs9379845
BTN3A1	6	26402464	26415444	57	rs1000308	rs9379852	464.46	8.46011e-08	9.3e-08	rs9379845
BTN2A3P	6	26421618	26430816	63	rs11962642	rs12174602	489.154	1.52017e-07	9.3e-08	rs9379845
BTN3A3	6	26440699	26453643	77	rs9358916	rs1131936	507.822	7.49508e-07	9.1e-08	rs12216155
ABT1	6	26597170	26600277	52	rs9379874	rs6933176	466.683	1.04769e-07	1.1e-09	rs17539358
ZNF322	6	26634610	26659980	43	rs3757150	rs13208916	439.597	1.02892e-07	1.6e-09	rs7750131
HIST1H2BL	6	27775256	27775709	33	rs9393838	rs9295745	297.098	1.05728e-07	1.4e-07	rs1033450
HIST1H2AI	6	27775976	27776445	33	rs9393838	rs9295745	297.098	1.05728e-07	1.4e-07	rs1033450
HIST1H3H	6	27777841	27778314	33	rs59755365	rs57252182	297.579	2.8146e-07	1.4e-07	rs1033450
HIST1H2AJ	6	27782079	27782518	32	rs34543938	rs4713121	292.191	2.66446e-07	1.4e-07	rs1033450
HIST1H2BM	6	27782821	27783267	32	rs1033450	rs16867976	292.386	2.2715e-07	1.4e-07	rs1033450
HIST1H4J	6	27791902	27792258	32	rs6917366	rs59199903	253.846	1.55484e-06	1.4e-07	rs2393997
ZNF165	6	28048481	28057340	31	rs6933825	rs9368545	407.081	9.31294e-13	1.3e-17	rs7742858
ZSCAN12P1	6	28058584	28063493	31	rs7760871	rs9393874	408.37	1.54615e-13	1.3e-17	rs7742858
ZSCAN16-AS1	6	28089572	28105094	39	rs2116984	rs9393884	487.55	1.74756e-10	1.7e-17	rs6456804
ZSCAN16	6	28092386	28097856	36	rs276362	rs4713135	454.017	6.52797e-11	1.7e-17	rs6456804
ZKSCAN8	6	28109687	28127250	45	rs12332927	rs9368552	603.283	5.48501e-11	4e-21	rs10484404
ZNF192P1	6	28129538	28137373	41	rs16893549	rs9393891	575.303	1.79246e-11	4e-21	rs10484404
TOB2P1	6	28183115	28186707	37	rs9380045	rs9393897	455.446	3.50449e-10	4e-21	rs10484404
ZSCAN9	6	28193028	28201264	35	rs149954	rs9380064	448.976	2.14446e-10	4e-21	rs10484404
ZKSCAN4	6	28212489	28220002	37	rs16893666	rs1150686	483.408	5.05458e-11	1.6e-21	rs1150685
NKAPL	6	28227074	28228736	37	rs370266	rs735765	501.829	4.53208e-10	1.6e-21	rs1150685
ZSCAN26	6	28234787	28246000	42	rs203885	rs35001169	722.668	4.16398e-12	1.3e-24	rs1150697
PGBD1	6	28249313	28270326	49	rs35345226	rs967005	730.001	4.35085e-11	1.3e-24	rs1150697
ZSCAN31	6	28292514	28304152	54	rs16893735	rs1150726	928.367	6.10678e-12	1.3e-24	rs1150697
ZKSCAN3	6	28317690	28336954	56	rs9468306	rs34950484	1170.11	4.81427e-15	1.3e-24	rs1150697
ZSCAN12	6	28346597	28367544	48	rs1778469	rs60568488	982.581	7.64873e-16	1.3e-22	rs1778477
ZSCAN23	6	28400431	28411279	49	rs1150726	rs3799500	900.976	1.38557e-13	1.3e-22	rs1778477
GPX6	6	28471072	28483570	46	rs9468345	rs2531813	658.906	1.93351e-10	8.1e-17	rs2232428
GPX5	6	28493788	28502728	43	rs1054372	rs16894128	559.776	4.88945e-11	8.1e-17	rs2232428
ZBED9	6	28539406	28555112	54	rs1558205	rs16894143	572.833	8.29741e-10	5.4e-15	rs4624865
HCG14	6	28864306	28865097	67	rs3869043	rs209173	488.136	1.73406e-06	6.3e-15	rs28381664
ZNF311	6	28962593	28973037	48	rs209174	rs2013848	424.754	5.33649e-07	1.5e-17	rs41316614
LOC100129636	6	29003999	29044517	52	rs209153	rs6909302	731.924	3.3105e-10	7.5e-18	rs41316621
OR2W1	6	29011989	29012952	40	rs7755875	rs62407578	662.012	5.20378e-11	7.5e-18	rs41316621
OR2B3	6	29053984	29055090	34	rs2015436	rs41316633	603.077	1.33978e-11	7.5e-18	rs41316621
OR2J3	6	29079586	29080661	35	rs4947256	rs3117141	589.514	1.62787e-12	5.2e-15	rs6933672
OR2J2	6	29141310	29142351	42	rs6916161	rs3129109	689.912	1.20048e-13	6.2e-16	rs2142903
OR14J1	6	29274466	29275432	55	rs3130723	rs3117335	837.372	2.11278e-11	6e-16	rs9393949
OR5V1	6	29323006	29324054	39	rs3129180	rs9468510	777.801	1.6449e-14	6e-16	rs9393949
OR12D3	6	29341199	29343068	43	rs3129096	rs720831	828.098	6.55617e-13	3.7e-16	rs17404424
OR12D2	6	29364415	29365448	38	rs3129103	rs9257746	721.661	2.19291e-13	3.7e-16	rs17404424
OR11A1	6	29393280	29395509	44	rs3130829	rs6934993	727.48	6.42045e-13	3.7e-16	rs17404424
OR10C1	6	29407715	29408754	48	rs2394551	rs34843450	797.998	7.27076e-13	3.7e-16	rs17404424
OR2H1	6	29426229	29432099	69	rs7754451	rs62408569	918.522	3.92209e-11	3.4e-18	rs28561535
MAS1L	6	29454542	29455679	67	rs9257726	rs7349908	812.673	8.33329e-11	3.4e-18	rs28561535
LINC01015	6	29497182	29501345	68	rs9257799	rs2523444	811.459	8.73068e-11	3.4e-18	rs28561535
UBD	6	29523388	29527702	42	rs2073149	rs1233486	467.689	4.23402e-10	5.2e-19	rs9348832
SNORD32B	6	29550028	29550105	49	rs1419642	rs1592409	626.226	6.02191e-11	5.2e-19	rs9348832
OR2H2	6	29555682	29556745	50	rs9295805	rs1233425	668.351	1.66094e-11	7.6e-26	rs6913746
GABBR1	6	29570004	29600962	74	rs16894916	rs3025650	1166.73	8.84595e-15	6.3e-30	rs3025650
MOG	6	29624757	29640149	86	rs1345227	rs29251	1362.33	3.92114e-15	6.3e-30	rs3025650
ZFP57	6	29640168	29644931	82	rs2523433	rs28359977	1265.13	2.02341e-14	6.3e-30	rs3025650
HLA-F	6	29691116	29695073	85	rs388234	rs2535246	1838.55	1.42779e-24	1.1e-40	rs2252711
HLA-F-AS1	6	29694377	29716826	108	rs12174271	rs2747466	2079.96	8.07502e-22	6.9e-41	rs17184549
IFITM4P	6	29718583	29718925	92	rs56142919	rs3116813	1512.84	2.6743e-16	6.9e-41	rs17184549
HCG4	6	29758807	29760850	147	rs28359990	rs2248927	4376.51	5.86645e-28	6.9e-41	rs17184549
LOC554223	6	29759682	29765584	152	rs62392942	rs2844830	4580.69	3.16975e-28	6.9e-41	rs17184549
HLA-G	6	29794755	29798899	201	rs3763334	rs62391851	6977.94	1.68908e-31	4.1e-43	rs4713242
HLA-H	6	29855536	29858857	254	rs4713237	rs2517894	9287.58	6.88203e-27	4.1e-43	rs4713242
HCG4B	6	29892368	29894992	308	rs2523754	rs9258874	10742.4	1.67656e-27	4.7e-39	rs9380146
HLA-A	6	29910246	29913661	371	rs9258381	rs3132695	12078.8	7.59483e-29	4.7e-39	rs9380146
HCG9	6	29942891	29946177	438	rs2517937	rs2571428	11396.4	3.22629e-21	4.7e-39	rs9380146
ZNRD1-AS1	6	29968787	30028961	866	rs60167059	rs3094146	24649.6	1.30183e-23	4.7e-39	rs9380146
HLA-J	6	29973747	29977733	679	rs6922901	rs9260456	18765.2	5.75134e-22	4.7e-39	rs9380146
HCG8	6	29979877	29981699	699	rs2517862	rs9260644	19194.1	1.86177e-21	1.1e-38	rs9380147
ZNRD1	6	30029016	30032686	595	rs1611513	rs28400886	17529.1	1.04344e-23	3.6e-37	rs28780068
PPP1R11	6	30034931	30038108	576	rs2253523	rs3734836	17377.2	4.86511e-24	3.6e-37	rs28780068
RNF39	6	30038042	30043628	563	rs3128989	rs9348835	16811.1	4.86271e-24	3.6e-37	rs28780068
TRIM31	6	30070673	30080867	311	rs17879496	rs9261258	8583.6	2.28406e-26	3.6e-37	rs28780068
TRIM40	6	30103884	30116512	95	rs3132685	rs60418878	2162.19	1.9281e-19	1.5e-30	rs9295830
TRIM10	6	30119722	30128711	103	rs9260976	rs2523994	2627.94	5.43073e-24	1.5e-30	rs9295830
TRIM15	6	30130982	30140473	127	rs9261103	rs2523983	4326.23	4.26173e-38	2.1e-54	rs7767857
TRIM26	6	30152231	30181271	152	rs9261163	rs34018127	7170.72	1.16283e-51	2.1e-54	rs7767857
HCG17	6	30201815	30293911	177	rs3807033	rs3129707	9194.17	5.19659e-60	9.1e-58	rs3130396
HLA-L	6	30227338	30234728	110	rs9261403	rs58432754	6471.36	1.62478e-57	1.2e-55	rs4711211
MIR6891	6	30229276	30229317	103	rs1116221	rs2523715	5985.24	4.26097e-57	1.2e-55	rs4711211
HCG18	6	30255173	30294933	100	rs9261450	rs2844762	5865.15	1.74764e-56	9.1e-58	rs3130396
TRIM39	6	30294620	30311506	80	rs929157	rs1132547	3730.17	2.72691e-42	3.3e-58	rs4713305
TRIM39-RPP21	6	30297087	30314635	77	rs929156	rs9368632	3604.52	3.00879e-41	3.3e-58	rs4713305
RPP21	6	30312905	30314635	70	rs9261547	rs9368632	3355.65	1.45032e-40	3.3e-58	rs4713305
HLA-E	6	30457182	30461982	118	rs3094067	rs9468747	4770	4.28637e-27	2.3e-57	rs974961
GNL1	6	30509154	30525371	138	rs3094712	rs2508021	6504.44	9.21943e-28	1.8e-50	rs34982703
PRR3	6	30524485	30532473	120	rs3131113	rs2429657	6196.83	3.35145e-28	1.8e-50	rs34982703
ABCF1	6	30539169	30559309	114	rs9261836	rs3130039	5648.93	3.22974e-28	1.8e-50	rs34982703
MIR877	6	30552108	30552194	94	rs9261945	rs2516652	4847.89	4.0255e-30	1.8e-50	rs34982703
PPP1R10	6	30568176	30585084	88	rs1264518	rs2516647	4578.21	3.38456e-33	1.8e-50	rs34982703
MRPS18B	6	30585485	30594174	58	rs9501336	rs3130041	3227.57	2.01848e-47	2.2e-41	rs41265828
ATAT1	6	30594612	30614598	47	rs12174870	rs9262118	2321.19	4.45712e-36	2.2e-41	rs41265828
C6orf136	6	30614815	30620987	27	rs1059510	rs1264431	959.24	1.01303e-16	2.2e-41	rs41265828
DHX16	6	30620895	30640830	31	rs2844725	rs2267639	1227.36	1.197e-22	1.3e-40	rs1264423
PPP1R18	6	30644165	30655672	31	rs2844716	rs2517564	1252.6	1.50532e-28	1.3e-40	rs1264423
NRM	6	30655823	30659197	31	rs2534816	rs13201129	1261.34	4.89981e-30	1.3e-40	rs1264423
MDC1	6	30667583	30685458	37	rs2524222	rs1076829	1628.8	7.47642e-39	5e-43	rs1140809
TUBB	6	30688156	30693195	35	rs2074504	rs3094097	1443.59	2.66197e-37	5e-43	rs1140809
FLOT1	6	30695510	30710453	36	rs3132613	rs3129996	1473.43	1.03398e-39	5e-43	rs1140809
IER3	6	30710975	30712327	34	rs1264437	rs2269706	1410.96	1.20086e-48	5e-43	rs1140809
DDR1	6	30851860	30867933	123	rs56026300	rs11752162	5464.02	1.40522e-49	3.3e-91	rs62400982
MIR4640	6	30858659	30858749	113	rs9968884	rs1264344	4717.99	3.72395e-44	6.6e-43	rs12190167
GTF2H4	6	30875976	30881880	124	rs2535324	rs2844660	6035.38	3.8696e-53	3.3e-91	rs62400982
VARS2	6	30881981	30894235	122	rs12213680	rs10947109	5818.21	1.82192e-52	3.3e-91	rs62400982
SFTA2	6	30899126	30899952	108	rs4248148	rs3131032	5657.24	8.70061e-58	3.3e-91	rs62400982
DPCR1	6	30908776	30921998	109	rs28894085	rs1264318	6427.09	4.4111e-65	3.3e-91	rs62400982
MUC21	6	30951484	30957675	64	rs12212837	rs3095152	3996.59	2.22925e-47	3.3e-91	rs62400982
MUC22	6	30973728	31003179	84	rs28732075	rs2530704	4343.21	3.6806e-57	5.3e-76	rs34847854
HCG22	6	31021226	31027655	83	rs1264318	rs2508016	4494.68	4.12228e-71	5.3e-76	rs34847854
C6orf15	6	31078999	31080332	195	rs45627239	rs3915966	8398.08	1.43149e-53	2.2e-76	rs35590025
PSORS1C1	6	31082607	31107869	226	rs11753326	rs12191286	9526.47	5.17708e-53	2.2e-76	rs35590025
CDSN	6	31082864	31088252	205	rs11753326	rs2517510	8828.51	9.23582e-55	2.2e-76	rs35590025
PSORS1C2	6	31105310	31107127	194	rs2844679	rs6921557	8395.35	2.05675e-51	2.2e-76	rs35590025
CCHCR1	6	31110215	31126015	214	rs2517420	rs4713433	9203.81	7.91789e-49	2.2e-76	rs35590025
TCF19	6	31126302	31131992	221	rs35281047	rs7381897	8818.54	1.45187e-45	2.2e-76	rs35590025
POU5F1	6	31132113	31138470	221	rs2844667	rs1265052	8648.63	7.15284e-43	2.2e-76	rs35590025
PSORS1C3	6	31141511	31145676	238	rs28360981	rs3094210	8857.05	2.29445e-39	2.2e-76	rs35590025
HCG27	6	31165536	31171745	229	rs2517552	rs9263745	9150.59	3.78488e-39	5.1e-77	rs1265096
HLA-C	6	31236525	31239913	254	rs1265058	rs9468896	12176.1	1.11468e-51	5.1e-77	rs1265096
HLA-B	6	31321648	31324989	444	rs6922077	rs2247179	26360.1	3.27996e-47	3.8e-68	rs10807081
MIR6891_dup_1	6	31323000	31323093	432	rs9500883	rs2524131	26044.7	7.93025e-48	3.8e-68	rs10807081
MICA	6	31367560	31383092	925	rs3869122	rs9266216	47213.5	5.85539e-51	2e-74	rs35192021
HCP5	6	31430956	31433586	850	rs396038	rs9366783	44938.9	1.24796e-56	9.7e-85	rs2523627
HCG26	6	31439005	31440185	850	rs6941926	rs7775227	45214.2	2.79095e-57	9.7e-85	rs2523627
MICB	6	31462657	31478901	775	rs1634765	rs2523688	43328.3	1.07226e-61	9.7e-85	rs2523627
MCCD1	6	31496738	31498008	383	rs2596434	rs14597	26519	1.4177e-67	2.8e-116	rs2523668
DDX39B	6	31497995	31510252	416	rs2844559	rs2516506	28342.5	8.4943e-70	2.8e-116	rs2523668
ATP6V1G2-DDX39B	6	31497995	31514625	434	rs2844559	rs3130911	28772.5	7.03438e-69	2.8e-116	rs2523668
SNORD117	6	31504150	31504226	371	rs2507982	rs2516425	24588.3	5.74044e-64	2.8e-116	rs2523668
SNORD84	6	31508877	31508955	340	rs2523486	rs2523709	20326.2	8.25848e-56	2.8e-116	rs2523668
ATP6V1G2	6	31512227	31514625	330	rs2523481	rs3130911	19147.3	7.08107e-54	2.8e-116	rs2523668
NFKBIL1	6	31514627	31526606	362	rs2905713	rs61463031	20363.2	2.01894e-56	2.8e-116	rs2523668
LTA	6	31539875	31542100	298	rs7756993	rs3094000	14987.1	2.68035e-63	2.8e-116	rs2523668
TNF	6	31543343	31546112	291	rs2848711	rs2516489	14934.9	2.10054e-65	2.8e-116	rs2523668
LTB	6	31548335	31550202	289	rs10223570	rs9267466	14487.4	9.73245e-64	2.8e-116	rs2523668
LST1	6	31553955	31556686	285	rs2516451	rs3093978	14576.4	2.62754e-64	2.8e-116	rs2523668
NCR3	6	31556659	31560762	286	rs2524278	rs3131628	14596.5	2.07286e-63	2.8e-116	rs2523668
AIF1	6	31582993	31584798	234	rs2254386	rs45457097	11458.9	1.19727e-54	2.8e-116	rs2523668
PRRC2A	6	31588449	31605554	231	rs3094605	rs769178	10572.8	6.90538e-52	2.8e-116	rs2523668
SNORA38	6	31590855	31590987	209	rs11757667	rs2857709	9563.55	6.66261e-49	2.8e-116	rs2523668
MIR6832	6	31601563	31601635	182	rs16899682	rs1800629	7496.23	6.77623e-43	2.4e-101	rs2248477
BAG6	6	31606804	31620477	186	rs3749946	rs2857599	7179.61	4.36764e-41	1.2e-80	rs45457097
APOM	6	31620186	31625987	138	rs2534685	rs3130631	5492.12	1.01543e-35	1.2e-80	rs45457097
C6orf47	6	31626074	31628549	131	rs2534666	rs2507960	5287.15	4.25679e-36	1.2e-80	rs45457097
GPANK1	6	31629005	31634060	138	rs2855810	rs9348876	6170.93	1.56968e-42	1.1e-82	rs2844479
CSNK2B	6	31633656	31637847	122	rs3093952	rs2844477	5909.63	4.40793e-48	1.1e-82	rs2844479
LY6G5B	6	31638727	31640227	112	rs2516403	rs3132451	5598.97	3.61289e-54	1.1e-82	rs2844479
LY6G5C	6	31644460	31648150	110	rs3093950	rs2736173	8917.78	9.77215e-97	1.3e-185	rs34451818
ABHD16A	6	31654725	31671137	122	rs3130054	rs12055599	11153.7	7.83894e-121	2.8e-186	rs35502919
MIR4646	6	31668805	31668868	109	rs2523504	rs1077393	10880.8	7.73803e-146	2.8e-186	rs35502919
LY6G6F	6	31674683	31678372	107	rs2857607	rs813115	11205.2	9.55523e-152	2.8e-186	rs35502919
LY6G6E	6	31679752	31681842	105	rs3094594	rs9404941	10925.5	5.4994e-149	2.8e-186	rs35502919
LY6G6D	6	31683132	31685581	102	rs3093949	rs3130617	10891.1	2.21477e-160	2.8e-186	rs35502919
LY6G6C	6	31686424	31689511	103	rs17200733	rs3117580	11614.9	4.97936e-169	2.8e-186	rs35502919
C6orf25	6	31691120	31694485	104	rs2857602	rs3117578	11879.8	1.93499e-178	2.8e-186	rs35502919
DDAH2	6	31694816	31698039	103	rs9267499	rs9267532	11856.6	6.47629e-184	2.8e-186	rs35502919
CLIC1	6	31698357	31705095	100	rs746868	rs11575852	12119.1	1.90836e-192	2.8e-186	rs35502919
MSH5	6	31707724	31730455	88	rs3093562	rs34406901	11645.5	1.19982e-202	2.8e-186	rs35502919
MSH5-SAPCD1	6	31707724	31732624	90	rs3093562	rs12525100	11895.1	6.56672e-207	2.8e-186	rs35502919
SAPCD1	6	31730772	31732624	63	rs62395789	rs12525100	10336	2.47674e-195	2.8e-186	rs35502919
VWA7	6	31733370	31745108	69	rs2857609	rs1065356	11151.8	6.38236e-177	1.7e-189	rs805284
VARS	6	31745296	31763712	68	rs2736176	rs378538	11023.8	4.79371e-178	1.7e-189	rs805284
LSM2	6	31765168	31774761	62	rs28732154	rs3130484	8418.95	2.8508e-129	1.7e-189	rs805284
HSPA1L	6	31777395	31782835	56	rs3117583	rs9296001	7630.69	5.39863e-123	1.7e-189	rs805284
HSPA1A	6	31783290	31785719	59	rs707922	rs3117577	8515.78	1.00177e-135	1.7e-189	rs805284
HSPA1B	6	31795511	31798031	55	rs5872	rs707931	8299.02	3.27781e-131	1.7e-189	rs805284
C6orf48	6	31802691	31807543	56	rs9267533	rs915651	8299.2	4.23496e-123	1.7e-189	rs805284
SNORD48	6	31803039	31803103	54	rs9267533	rs707928	8191.88	1.75876e-130	1.7e-189	rs805284
SNORD52	6	31804852	31804916	54	rs11575852	rs707927	8203.13	6.21808e-131	1.7e-189	rs805284
NEU1	6	31826828	31830709	60	rs2295663	rs494718	7885.32	1.09875e-119	1.7e-189	rs805284
SLC44A4	6	31830969	31846823	66	rs9267546	rs62395828	8859.94	1.72631e-118	1.7e-189	rs805284
EHMT2	6	31847535	31865484	60	rs805292	rs733539	6448.27	2.17757e-106	7.4e-153	rs2075800
C2	6	31865561	31913451	89	rs3131382	rs7743807	12450.3	2.62232e-155	7.4e-153	rs2075800
ZBTB12	6	31867393	31869769	53	rs28745893	rs3115673	5814.17	8.76541e-119	7.4e-153	rs2075800
LOC102060414	6	31902250	31909501	70	rs2736426	rs2844458	10153.9	2.11149e-167	7.4e-153	rs2075800
CFB	6	31913720	31919861	72	rs3115670	rs28732164	10742.1	1.19831e-170	7.4e-153	rs2075800
NELFE	6	31919863	31926864	75	rs4713488	rs2844456	12434.5	1.09736e-189	3.9e-205	rs2844456
MIR1236	6	31924615	31924717	72	rs2763980	rs2844456	11994.3	1.15427e-190	3.9e-205	rs2844456
SKIV2L	6	31926580	31937532	78	rs681331	rs3128761	12478	3.87661e-192	3.9e-205	rs2844456
DXO	6	31937587	31940032	77	rs7757496	rs2844452	12536.6	6.0775e-189	3.9e-205	rs2844456
STK19	6	31938951	31949223	79	rs34416404	rs544167	12930	5.07132e-195	3.9e-205	rs2844456
C4A	6	31949833	31970457	83	rs2763979	rs9332730	14489.5	2.23462e-195	3.9e-205	rs2844456
C4B	6	31949833	31970458	83	rs2763979	rs9332730	14489.5	2.23462e-195	3.9e-205	rs2844456
C4B_2	6	31949833	31970458	83	rs2763979	rs9332730	14489.5	2.23462e-195	3.9e-205	rs2844456
CYP21A2	6	31973358	31976712	78	rs12210887	rs4151657	14490.7	1.24919e-182	3.9e-205	rs2844456
CYP21A1P	6	31973412	31976686	78	rs12210887	rs4151657	14490.7	1.24919e-182	3.9e-205	rs2844456
TNXA	6	31976196	31980800	80	rs9501157	rs630379	15072.1	8.36869e-179	3.9e-205	rs2844456
TNXB	6	31976196	31981050	80	rs9501157	rs630379	15072.1	8.36869e-179	3.9e-205	rs2844456
STK19_dup_1	6	31981517	31981961	75	rs9267649	rs630379	14491	2.08605e-176	3.9e-205	rs2844456
C4A_dup_1	6	31982571	32003194	92	rs9267649	rs41315816	16171.9	3.22844e-189	3.9e-205	rs2844456
C4B_dup_1	6	31982571	32003195	92	rs9267649	rs41315816	16171.9	3.22844e-189	3.9e-205	rs2844456
C4B_2_dup_1	6	31982571	32003195	92	rs9267649	rs41315816	16171.9	3.22844e-189	3.9e-205	rs2844456
CYP21A2_dup_1	6	32006092	32009447	72	rs589428	rs616634	12514.8	9.11196e-215	3.9e-205	rs2844456
TNXB_dup_1	6	32008931	32077151	80	rs652888	rs10046127	15079.8	2.64807e-220	3.9e-205	rs2844456
ATF6B	6	32083044	32096017	59	rs34555781	rs17207923	11260.9	4.1844e-207	5.3e-215	rs34562262
FKBPL	6	32096483	32098067	42	rs416002	rs2071295	9048.19	2.58552e-204	5.3e-215	rs34562262
PRRT1	6	32116139	32119720	41	rs28361032	rs204897	9206.06	8.23609e-214	5.3e-215	rs34562262
LOC100507547	6	32120578	32122142	41	rs28361032	rs204896	9206.06	8.23609e-214	5.3e-215	rs34562262
PPT2	6	32121228	32131458	42	rs28361032	rs439844	9776.14	8.25088e-223	5.3e-215	rs34562262
PPT2-EGFL8	6	32121775	32136062	47	rs28361032	rs411337	10367.4	6.49405e-213	5.3e-215	rs34562262
EGFL8	6	32132381	32136062	46	rs9501393	rs411337	9882.2	1.83657e-214	5.3e-215	rs34562262
AGPAT1	6	32135982	32145888	53	rs28585492	rs62402721	10975.7	2.11201e-224	5.3e-215	rs34562262
MIR6721	6	32137806	32137893	45	rs6463	rs17207986	9945.56	1.73598e-220	5.3e-215	rs34562262
RNF5	6	32146161	32148570	52	rs6463	rs204888	10963.7	6.43523e-226	5.3e-215	rs34562262
RNF5P1	6	32146231	32148567	52	rs6463	rs204888	10963.7	6.43523e-226	5.3e-215	rs34562262
MIR6833	6	32147592	32147653	52	rs6463	rs204888	10963.7	6.43523e-226	5.3e-215	rs34562262
AGER	6	32148744	32152099	52	rs6463	rs204894	10963.7	6.43523e-226	5.3e-215	rs34562262
PBX2	6	32152509	32157963	56	rs6463	rs9267802	12019.1	6.30849e-220	5.3e-215	rs34562262
GPSM3	6	32158542	32163300	58	rs6463	rs55746013	12348.6	6.72437e-224	5.3e-215	rs34562262
NOTCH4	6	32162619	32191844	78	rs6463	rs2849013	17303.8	9.20468e-267	1e-250	rs9296009
C6orf10	6	32260474	32339689	214	rs13211318	rs1018430	63887.6	5.50363e-307	1e-250	rs9296009
HCG23	6	32358286	32361468	137	rs6913558	rs28732191	62715.3	0	1e-250	rs9267989
HLA-DRA	6	32407618	32412826	131	rs9268121	rs28362674	76054.7	0	1e-250	rs9268145
HLA-DRB5	6	32485153	32498006	253	rs6904608	rs5026743	146850	0	1e-250	rs9268362
HLA-DRB6	6	32520489	32527779	254	rs41535850	rs5020944	169994	0	1e-250	rs2076533
HLA-DRB1	6	32546546	32557613	219	rs2213580	rs5020944	145695	0	1e-250	rs9268557
HLA-DQA1	6	32605182	32611429	17	rs29001620	rs2157339	16868.1	0	1e-250	rs29001620
HLA-DQB1	6	32627240	32634466	113	rs2187825	rs646159	61484.1	0	1e-250	rs2454139
HLA-DQA2	6	32709162	32714664	730	rs28366341	rs28747060	384964	0	1e-250	rs2454139
HLA-DQB2	6	32723874	32731330	787	rs9270652	rs34751870	472022	0	1e-250	rs2454139
HLA-DOB	6	32780539	32784825	532	rs9273327	rs17850863	240831	0	1e-250	rs55722612
TAP2	6	32789609	32806600	530	rs9274350	rs34043227	231686	0	1e-250	rs55722612
PSMB8	6	32808493	32812712	440	rs2858303	rs28986399	203830	0	1e-250	rs9275151
TAPSAR1	6	32811862	32814277	410	rs9275171	rs13197727	188805	0	1e-250	rs3134970
TAP1	6	32812985	32821748	416	rs2856685	rs9276724	188035	0	1e-250	rs9275185
PSMB9	6	32821937	32827628	368	rs35239297	rs2621360	139117	5.78924e-298	1e-250	rs6457619
LOC100294145	6	32861952	32871535	266	rs7744593	rs1057373	37188.9	4.23257e-132	3.8e-235	rs34422230
HLA-DMB	6	32902405	32908847	205	rs9276632	rs2127675	24300.1	3.31175e-139	3.8e-235	rs34422230
HLA-DMA	6	32916390	32920899	182	rs1158785	rs241407	20228.4	1.78308e-124	3.8e-235	rs34422230
BRD2	6	32936436	32949282	161	rs7383433	rs149392	17916.5	9.21696e-125	1.5e-228	rs41317090
HLA-DOA	6	32971959	32977389	113	rs11540142	rs6918372	9799.63	2.90417e-92	1e-176	rs35029304
HLA-DPA1	6	33032345	33048555	165	rs9296058	rs2082261	15084.3	3.45365e-142	1e-176	rs35029304
HLA-DPB1	6	33043702	33057473	171	rs35599935	rs3135195	15589	7.37729e-145	1e-176	rs35029304
HLA-DPB2	6	33080292	33096890	238	rs9378127	rs2301220	23166.7	5.92375e-139	3.5e-130	rs3128947
COL11A2	6	33130468	33160245	348	rs1044429	rs9277826	38375	3.16987e-135	2.3e-115	rs41270518
RXRB	6	33161361	33168630	300	rs423196	rs9394138	35118.2	5.1629e-132	2.3e-115	rs41270518
SLC39A7	6	33168602	33172214	294	rs35422538	rs1003979	34329.2	3.17503e-132	2.3e-115	rs41270518
HSD17B8	6	33172413	33174608	293	rs2859172	rs6916739	34423.4	5.17047e-133	2.3e-115	rs41270518
MIR219A1	6	33175611	33175721	284	rs3130577	rs3129214	33853.3	6.10061e-134	2.3e-115	rs41270518
RING1	6	33176285	33180499	289	rs3130578	rs756440	34270	7.66376e-134	2.3e-115	rs41270518
HCG25	6	33217312	33222667	194	rs2395313	rs6531	13597.4	4.27833e-64	2.3e-85	rs3117216
VPS52	6	33218048	33239742	197	rs2281388	rs2854027	13758.9	1.96296e-64	2.3e-85	rs3117216
RPS18	6	33239851	33244281	165	rs9348907	rs213212	10663	5.51366e-52	5.1e-96	rs1704996
B3GALT4	6	33244916	33246602	152	rs3117034	rs28892580	9181.98	6.93893e-49	5.1e-96	rs1704996
WDR46	6	33246879	33257304	154	rs3117031	rs213198	9149.77	1.40496e-49	5.1e-96	rs1704996
MIR6873	6	33255003	33255066	136	rs3117002	rs34859217	8183.94	6.65565e-47	5.1e-96	rs1704996
PFDN6	6	33257373	33258711	131	rs9378180	rs213198	7860.63	4.2791e-48	5.1e-96	rs1704996
MIR6834	6	33258021	33258102	124	rs4947260	rs213198	7426.75	1.00795e-49	5.1e-96	rs1704996
RGL2	6	33259430	33267165	125	rs34588178	rs1704998	7330.17	1.49343e-49	5.1e-96	rs1704996
TAPBP	6	33267471	33282164	113	rs3129249	rs213219	6782.86	1.46271e-53	5.1e-96	rs1704996
ZBTB22	6	33282181	33285719	87	rs9277911	rs12191464	5156.29	1.38498e-50	5.1e-96	rs1704996
DAXX	6	33286334	33290793	69	rs9368757	rs213201	4368.2	5.27294e-56	5.1e-96	rs1704996
KIFC1	6	33359312	33377699	38	rs213220	rs211476	2434.99	5.74579e-43	3.9e-53	rs1704998
PHF1	6	33378772	33384230	37	rs213217	rs3106192	2233.68	2.76596e-40	2.5e-44	rs9277976
CUTA	6	33384318	33386065	36	rs12191464	rs9278019	2164.5	3.34707e-39	2.5e-44	rs9277976
SYNGAP1	6	33387846	33421466	45	rs474353	rs461887	2509.43	1.78281e-41	2.5e-44	rs9277976
MIR5004	6	33406107	33406214	37	rs213215	rs2747479	2178.65	9.13196e-42	2.5e-44	rs9277976
ZBTB9	6	33422355	33425320	35	rs2282850	rs391500	2098.37	7.63082e-42	2.5e-44	rs9277976
BAK1	6	33540322	33548070	56	rs41267647	rs191902	1852.26	6.4345e-25	7.7e-59	rs41267649
GGNBP1	6	33551475	33556803	54	rs2076775	rs1794687	1448.82	6.28864e-20	1.7e-31	rs13211714
LINC00336	6	33553882	33561115	54	rs1106606	rs62405926	1369.74	3.3292e-19	1.7e-31	rs13211714
ITPR3	6	33589155	33664348	144	rs1755047	rs12207576	3059.99	4.7899e-23	7.6e-39	rs55844831
UQCC2	6	33664537	33679528	124	rs404778	rs1408711	2543.61	1.95972e-25	7.6e-39	rs55844831
IP6K3	6	33689442	33714762	164	rs9380369	rs11759396	4363.43	2.33936e-32	1.4e-49	rs2296330
LEMD2	6	33738989	33756906	137	rs578452	rs6457740	4701.1	3.05479e-38	1.4e-49	rs2296330
MLN	6	33762448	33771793	118	rs12660617	rs602399	4713.99	4.82855e-42	1.4e-49	rs2296330
LINC01016	6	33857287	33864684	111	rs4713670	rs10947455	5058.44	1.61599e-45	6.5e-42	rs3763258
MIR7159	6	33866911	33866977	106	rs568901	rs7768569	4524.67	2.06919e-41	6.5e-42	rs3763258
MIR1275	6	33967748	33967828	190	rs12207818	rs2499736	1231.73	2.26253e-11	2.2e-21	rs9368779
KCTD20	6	36410543	36458920	150	rs1004632	rs1535510	761.384	1.02545e-07	1.6e-09	rs1885205
STK38	6	36461668	36515247	93	rs12530018	rs2146333	749.826	1.09494e-09	1.6e-09	rs1885205
SPATS1	6	44310396	44344904	137	rs34558317	rs12176561	733.369	1.02233e-08	7.6e-19	rs2233424
CDC5L	6	44355250	44418161	120	rs41282662	rs11571917	852.644	1.81756e-09	7.6e-19	rs2233424
MIR4642	6	44403377	44403459	61	rs325018	rs3757288	544.561	1.30257e-08	2.3e-17	rs61742784
LOC100130476	6	138144806	138189370	67	rs12526015	rs5029949	573.312	2.05988e-09	2.4e-25	rs5029949
TNFAIP3	6	138188324	138204451	60	rs62434183	rs601035	595.961	7.1302e-12	2.4e-25	rs5029949
RSPH3	6	159398265	159421198	92	rs60593959	rs2451962	737.14	8.54248e-09	2e-10	rs2485363
RPS6KA2-AS1	6	167317185	167318557	60	rs41269595	rs9295385	1066.59	1.5763e-11	3.4e-12	rs2236313
RNASET2	6	167343003	167370077	42	rs2149093	rs6921588	915.471	2.58625e-12	1.2e-16	rs6456150
MIR3939	6	167411294	167411400	48	rs2181059	rs3093017	1983.47	9.20925e-21	6.1e-30	rs1571878
FGFR1OP	6	167412804	167455906	87	rs2237274	rs34253640	2263.04	3.22023e-21	6.1e-30	rs1571878
FAM71F2	7	128312319	128327926	101	rs35279564	rs56351500	983.772	6.82231e-10	2e-14	rs3757387
FAM71F1	7	128349114	128371797	82	rs35168289	rs12672081	1011.48	7.322e-12	2e-14	rs3757387
CALU	7	128379345	128413477	75	rs34110914	rs6974262	1016.01	1.73065e-11	2e-14	rs3757387
OPN1SW	7	128412542	128415844	43	rs3778754	rs4731541	670.641	2.03734e-10	2e-14	rs3757387
CCDC136	7	128431463	128462187	59	rs2280714	rs55839334	564.845	1.4983e-09	1.1e-11	rs12539741
FLNC	7	128470482	128499328	95	rs2305323	rs58412690	697.849	4.39707e-08	1.2e-11	rs34725944
ATP6V1F	7	128502856	128505903	95	rs34381587	rs2037738	662.566	5.32742e-07	1.3e-11	rs17339836
LOC100130705	7	128506463	128512101	100	rs11762968	rs28491302	664.404	1.36075e-06	1.3e-11	rs17339836
ZBTB10	8	81397853	81438500	63	rs11784890	rs534369	758.355	3.21665e-07	1.5e-07	rs6986109
CCL19	9	34689566	34691274	61	rs1061758	rs62549297	420.533	1.0286e-06	2.1e-13	rs11574914
CCL21	9	34709001	34710164	60	rs13299387	rs561280	573.749	1.40791e-09	2.1e-13	rs11574914
FAM205A	9	34723049	34729535	60	rs10972195	rs277600	572.271	9.71865e-10	2.1e-13	rs11574914
IL2RA	10	6052656	6104333	263	rs7090411	rs10752194	1055.55	4.57724e-07	1.5e-10	rs706778
RBM17	10	6130948	6159422	196	rs41294643	rs10905862	1159.5	7.72073e-08	1.5e-10	rs706778
PFKFB3	10	6186842	6277507	298	rs2256852	rs7906185	1036.72	1.2859e-06	1.5e-10	rs706778
MIR3155A	10	6194158	6194240	141	rs7072793	rs35420438	714.371	1.67132e-06	6.1e-10	rs10795791
MIR3155B	10	6194169	6194225	141	rs7072793	rs35420438	714.371	1.67132e-06	6.1e-10	rs10795791
PRKCQ	10	6469104	6622263	222	rs35296711	rs2435587	1195.47	6.20469e-08	1.5e-08	rs947474
GATA3	10	8096666	8117164	118	rs4747647	rs12412241	684.297	6.25642e-07	5.4e-08	rs3824660
C10orf107	10	63422718	63526091	104	rs10994981	rs4979759	862.572	2.79045e-12	5e-20	rs7902146
AMICA1	11	118064441	118095809	62	rs483598	rs529717	858.324	4.46418e-10	7.4e-15	rs55894437
MPZL3	11	118097404	118123083	59	rs687190	rs10892294	833.064	1.24566e-10	7.4e-15	rs55894437
MPZL2	11	118124130	118135251	53	rs4486664	rs1784300	937.285	1.00775e-12	7.4e-15	rs55894437
CD3E	11	118175294	118186890	52	rs488219	rs34561290	719.113	5.48838e-10	3.6e-15	rs11217044
CD3D	11	118209788	118213459	66	rs2508916	rs497916	849.708	4.14542e-11	3.6e-15	rs11217044
CD3G	11	118215058	118224497	74	rs1784295	rs11217081	862.052	1.05678e-10	3.6e-15	rs11217044
UBE4A	11	118230295	118269926	96	rs675003	rs647769	917.256	1.9901e-11	3.6e-15	rs11217044
LOC100131626	11	118251934	118289530	93	rs571470	rs4635088	633.616	1.21702e-08	4e-14	rs4938573
ATP5L	11	118272103	118280562	74	rs7107756	rs11217102	516.07	1.23246e-08	4e-14	rs4938573
CBX5	12	54624730	54673915	30	rs7302957	rs1131017	224.804	1.19977e-08	6.5e-10	rs705699
MIR3198-2	12	54625180	54625260	22	rs7302957	rs34962186	152.641	4.14564e-07	6.5e-10	rs705699
HNRNPA1	12	54674487	54679030	25	rs10783775	rs2456972	221.604	3.33811e-09	6.5e-10	rs705699
HNRNPA1P10	12	54674532	54678663	25	rs10783775	rs12831468	221.604	3.33811e-09	6.5e-10	rs705699
NFE2	12	54685890	54694821	27	rs1052165	rs11171733	281.355	3.452e-09	6.5e-10	rs705699
COPZ1	12	54718873	54745635	35	rs705698	rs2640569	407.42	1.47778e-08	6.5e-10	rs705699
MIR148B	12	54730999	54731098	26	rs7297662	rs2292238	306.217	3.17216e-08	2.6e-09	rs7971751
LOC102724050	12	54747474	54860814	53	rs35961650	rs1274494	447.467	1.54335e-07	2.6e-09	rs7971751
GPR84	12	54756228	54758270	32	rs58547071	rs17118317	350.309	3.48705e-08	2.6e-09	rs7971751
ZNF385A	12	54762912	54785089	33	rs35485002	rs61938988	347.785	3.80233e-08	2.6e-09	rs7971751
ITGA5	12	54789044	54813050	35	rs34228181	rs773643	343.632	3.52503e-07	2.6e-09	rs7971751
WIBG	12	56295196	56321697	63	rs10783832	rs11836228	496.36	1.70292e-06	4.2e-06	rs10783834
PMEL	12	56347888	56360496	61	rs903067	rs41292013	553.692	1.61806e-06	3.7e-07	rs701006
CDK2	12	56360552	56366573	59	rs703832	rs12422249	554.327	1.33941e-06	3.7e-07	rs701006
RAB5B	12	56367696	56390467	56	rs1027315	rs3741423	511.976	9.6604e-07	3.7e-07	rs701006
SUOX	12	56391042	56399309	50	rs1678532	rs703842	427.156	6.94963e-07	3.7e-07	rs701006
IKZF4	12	56414688	56432219	39	rs1689586	rs2307097	339.548	1.46649e-06	3.7e-07	rs701006
LINC00366	13	39141860	39153653	56	rs2324449	rs6563745	599.257	1.50454e-08	4.3e-10	rs9603603
FREM2	13	39261172	39461267	134	rs3012153	rs9549043	759.017	8.98496e-08	4.6e-12	rs9603616
ZFYVE26	14	68213236	68283306	203	rs8007479	rs8011558	901.459	1.5328e-06	1.9e-08	rs927292
IQCH	15	67547137	67794142	180	rs8027594	rs57781987	1347.15	9.84812e-10	6.5e-19	rs8026898
IQCH-AS1	15	67695948	67814182	150	rs2081538	rs8024781	1251.82	4.37598e-13	6.5e-19	rs8026898
C15orf61	15	67813521	67819641	65	rs4777176	rs12901014	855.76	4.08793e-15	6.5e-19	rs8026898
ZNF768	16	30535321	30537910	11	rs34114657	rs885107	154.661	5.76444e-07	4.6e-07	rs3747481
ZNF747	16	30542778	30546194	12	rs6565192	rs8051050	134.66	1.66905e-06	4.6e-07	rs3747481
ZNF764	16	30565084	30569642	11	rs55875685	rs6565197	125.936	5.49306e-07	4.6e-07	rs3747481
ZNF688	16	30581018	30583728	12	rs12918327	rs7197770	179.312	8.76717e-08	3.1e-07	rs35969813
ZNF785	16	30591993	30597092	10	rs7186852	rs7204278	143.154	7.97297e-08	3.1e-07	rs35969813
ZNF689	16	30613878	30622096	10	rs3747481	rs6565201	109.832	2.84542e-07	3.1e-07	rs35969813
PRR14	16	30662240	30667734	11	rs6565197	rs8058961	161.733	2.17274e-07	3.1e-07	rs35969813
FBRS	16	30675777	30682131	11	rs8058578	rs4889490	132.08	3.19042e-07	3.2e-07	rs8058578
LOC730183	16	30709024	30709810	13	rs11645367	rs11150596	197.117	7.05831e-07	3.2e-07	rs56656810
SRCAP	16	30710461	30751450	25	rs11645367	rs8050107	304.278	1.94494e-06	3.2e-07	rs56656810
SNORA30	16	30721857	30721986	14	rs11645367	rs2125293	214.666	6.35012e-07	3.2e-07	rs56656810
TBC1D3H_dup_1	17	34746062	34757007	21	rs612194	rs10491128	306.578	2.10863e-08	1.5e-07	rs665413
LOC101060321_dup_1	17	34746118	34756993	21	rs612194	rs10491128	306.578	2.10863e-08	1.5e-07	rs665413
TBC1D3F_dup_1	17	34746118	34808060	28	rs612194	rs8076041	418.924	3.73148e-08	1.3e-07	rs9646419
TBC1D3B	17	34797171	34808092	20	rs28482878	rs8076041	306.018	2.96354e-07	1.3e-07	rs9646419
ZNHIT3	17	34842470	34855154	24	rs7210488	rs11078904	417.673	4.43203e-08	7.3e-08	rs12449852
MYO19	17	34851598	34891305	33	rs2338797	rs34070318	522.738	3.88526e-08	6.7e-08	rs4795379
PIGW	17	34891402	34895150	27	rs56236848	rs1054488	412.518	3.05931e-08	6.7e-08	rs4795379
GGNBP2	17	34900736	34946276	39	rs11867312	rs9903269	592.407	2.05152e-08	1.8e-08	rs8075737
DHRS11	17	34948225	34957233	32	rs12948906	rs60750878	425.074	4.83392e-08	1.8e-08	rs8075737
MRM1	17	34958024	34965407	31	rs4795373	rs11078918	368.172	8.70279e-08	1.8e-08	rs8075737
LHX1	17	35294771	35301915	29	rs62066988	rs6503525	687.379	1.01712e-11	1.9e-12	rs12232497
AATF	17	35306174	35414171	91	rs28535471	rs8070452	858.684	6.70812e-07	1.9e-12	rs12232497
PSMG2	18	12658737	12725739	109	rs9303773	rs45510799	821.247	1.42694e-09	1e-14	rs6505765
LOC100996324	18	12739484	12749421	90	rs2542174	rs1893217	829.433	5.75843e-11	3.4e-15	rs2847297
PTPN2	18	12785476	12884334	146	rs7226608	rs12607919	1617.69	9.98816e-14	1.1e-15	rs7241016
DNMT1	19	10244021	10305755	127	rs2116941	rs7249333	594.009	9.3135e-07	1.3e-08	rs2304256
TYK2	19	10461203	10491248	88	rs4804133	rs17677316	523.851	4.02156e-07	2.7e-06	rs12459219
WFDC2	20	44098393	44110172	71	rs6017721	rs56050009	430.306	4.02969e-07	1.5e-09	rs6131010
SPINT3	20	44141100	44144264	80	rs2868364	rs7270330	944.204	1.53104e-12	9e-15	rs4239702
WFDC6	20	44162835	44168134	98	rs16991026	rs6032681	1135.09	1.81183e-13	9e-15	rs4239702
EPPIN-WFDC6	20	44164918	44176065	106	rs3901163	rs6074051	1155.04	2.02381e-13	9e-15	rs4239702
EPPIN	20	44169264	44176065	104	rs1128536	rs6074051	1143.84	1.93768e-13	9e-15	rs4239702
WFDC8	20	44179790	44207965	116	rs3092502	rs6131034	1102.09	2.38937e-12	9e-15	rs4239702
URB1	21	33683329	33765312	104	rs17643419	rs2834233	728.167	1.21515e-07	3.7e-07	rs1044218
SNORA80A	21	33749495	33749631	56	rs4817565	rs7283354	587.557	5.7026e-08	3.7e-07	rs1044218
C21orf119	21	33765441	33766266	51	rs2834214	rs2007053	502.686	1.54282e-07	3.7e-07	rs1044218
EVA1C	21	33784744	33887710	60	rs4817567	rs16990773	471.57	7.58009e-07	3.7e-07	rs1044218
KCNE2	21	35736322	35743440	66	rs57824579	rs7281046	400.256	3.82549e-07	8.8e-07	rs11701941
FAM3B	21	42688660	42729654	212	rs225334	rs2839537	999.228	1.13373e-07	3.7e-12	rs1893592
MX2	21	42733949	42780869	165	rs225313	rs228061	827.533	3.52085e-07	3.7e-12	rs1893592
PKNOX1	21	44394619	44454041	175	rs7281270	rs762424	1126.07	6.70744e-07	1.3e-07	rs2236668
CBS	21	44473300	44496472	177	rs62228182	rs9983978	1046.17	1.09546e-06	1.3e-07	rs2236668
RTN4R	22	20228937	20255816	11	rs5754100	rs4821116	165.577	8.22186e-07	9.1e-06	rs5754344
MIR1286	22	20236656	20236734	10	rs5754100	rs2283790	163.935	8.43901e-07	9.8e-06	rs2266961
GGA1	22	38004480	38029571	128	rs58510506	rs137699	1089.45	6.7337e-09	6.3e-14	rs909685
SH3BP1	22	38035683	38052050	120	rs36069260	rs1297231	1159.01	1.16611e-09	6.3e-14	rs909685
LOC101927051	22	38037838	38054384	118	rs6001523	rs1297231	1156.68	1.16449e-09	6.3e-14	rs909685
PDXP	22	38054736	38062939	96	rs1007117	rs1007337	947.381	6.34906e-10	6.3e-14	rs909685
LGALS1	22	38071612	38075809	93	rs62228372	rs4821892	883.583	3.55463e-10	6.3e-14	rs909685
NOL12	22	38082343	38089485	88	rs971964	rs35748716	810.417	7.92628e-10	6.3e-14	rs909685
TRIOBP	22	38092994	38172563	127	rs470081	rs62230591	824.567	2.30096e-07	6.3e-14	rs909685
